# Supplementary material for: Visible light induced deaminative alkylation of difluoroenoxysilanes: a transition metal free strategy
Source: Royal Society of Chemistry journal article supplement (doi:10.1039/d1qo00507c), 2021-01-01

# Visible Light Induced Deaminative Alkylation of Difluoroenoxy silanes: A Transition Metal Free Strategy

Qi-Ping Huang,<sup>a</sup> Yang Huang,<sup>a</sup> An-Jun Wang,<sup>a</sup> Liang Zhao,<sup>a, b</sup> Jia Jia,<sup>a</sup> Yanbo Yu,<sup>c</sup> Jie Tong,<sup>d</sup>  
Jiwei Gu<sup>c</sup> and Chun-Yang He<sup>\*, a, b</sup>

<sup>a</sup> Key Laboratory of Biocatalysis & Chiral Drug Synthesis of Guizhou Province, Generic Drug Research Center of Guizhou Province, Zunyi Medical University, Zunyi, Guizhou, P. R. China. \* hechy2002@163.com

<sup>b</sup> Key Laboratory of Basic Pharmacology of Ministry of Education and Joint International Research Laboratory of Ethnomedicine of Ministry of Education. School of Pharmacy. Zunyi Medical University, Zunyi, Guizhou, P. R. China

<sup>c</sup> School of Medicine, Washington University in St. Louis, St. Louis, Missouri 63110, United States

<sup>d</sup> School of Medicine, Yale University, New Haven, Connecticut 06510, United States.

\*E-mail: hechy2002@163.com

## List of Contents

|                                                                                          |     |
|------------------------------------------------------------------------------------------|-----|
| 1) General information                                                                   | S03 |
| 2) General procedure for the synthesis of Katritzky salts <b>1</b>                       | S03 |
| 3) General procedure for visible light promoted deaminative difluoroalkylation of Amines | S06 |
| 4) Detailed procedure for the 1 mmol-scale synthesis of compound <b>3a, 3ad.</b>         | S07 |
| 5) Mechanism studies                                                                     | S09 |
| 6) Data for compounds <b>1, 3, 6</b>                                                     | S14 |
| 7) References                                                                            | S33 |
| 8) Copies of NMR spectra of <b>1, 3, 5, 6</b>                                            | S34 |

## 1. General information.

$^1\text{H}$  NMR and  $^{13}\text{C}$  NMR spectra were recorded on an Agilent MR400 spectrometer.  $^{19}\text{F}$  NMR was recorded on an Agilent MR400 spectrometer ( $\text{CFCl}_3$  as outside standard and low field is positive). Chemical shifts ( $\delta$ ) are reported in ppm, and coupling constants ( $J$ ) are in Hertz (Hz). The following abbreviations were used to explain the multiplicities: s = singlet, d = doublet, t = triplet, q = quartet, m = multiplet, br = broad. NMR yield was determined by  $^{19}\text{F}$  NMR using p-fluorotoluene as an internal standard before working up the reaction.

**Materials:** All reagents were used as received from commercial sources, unless specified otherwise, or prepared as described in the literature. All reagents were weighed and handled in air at room temperature.

## 2. General procedure for the synthesis of Katritzky salts 1.

1a<sup>[1]</sup>, 1b<sup>[2]</sup>, 1c<sup>[2]</sup>, 1d<sup>[2]</sup>, 1e<sup>[2]</sup>, 1f<sup>[2]</sup>, 1g<sup>[2]</sup>, 1h<sup>[2]</sup>, 1i<sup>[2]</sup>, 1j<sup>[1]</sup>, 1k<sup>[2]</sup>, 1l<sup>[2]</sup>, 1n<sup>[2]</sup>, 1o<sup>[2]</sup>, 1p<sup>[2]</sup>, 1q<sup>[2]</sup>, 1r<sup>[2]</sup>, 1s<sup>[2]</sup>, 1t<sup>[2]</sup>, 1u<sup>[2]</sup>, 1v<sup>[2]</sup>, 1w<sup>[2]</sup>, 1y<sup>[3]</sup>, 1aa<sup>[3]</sup>, 1ab<sup>[2]</sup>, 1ac<sup>[2]</sup>, 1ad<sup>[2]</sup>, 1ae<sup>[2]</sup>, 1af<sup>[2]</sup>, 1ag<sup>[2]</sup>, 1ah<sup>[2]</sup>, 1ai<sup>[2]</sup>, 1al<sup>[4]</sup>, 1am<sup>[5]</sup>, 1an<sup>[6]</sup>, were prepared according to previous reported procedures. 1m, 1n, 1z, 1aj, 1ak (unknown Katritzky salts) were prepared according to literature procedures<sup>[2]</sup> as described as follows:

**Procedure 2a.** A 25 mL Schlenk tube equipped with a magnetic stirrer bar was charged with triphenylpyrylium tetrafluoroborate (2.5 mmol, 1.0 equiv.) and the corresponding primary amine (3.0 mmol, 1.2 equiv., if solid). Ethanol (2.5 mL, 1.0 M) was added followed by the corresponding primary amine (3.0 mmol, 1.2 equiv., if liquid). No precautions were taken to exclude oxygen or water. The reaction mixture was stirred and heated at reflux in an oil bath at 90 °C for 5 h. If precipitation occurred during the reaction, the solid was collected by filtration and washed with  $\text{Et}_2\text{O}$  (3×25 mL). If no precipitation occurred,  $\text{Et}_2\text{O}$  (7.5 mL) was added and the crude mixture was stirred for 1 h. The resulting solid was collected by filtration and washed with  $\text{Et}_2\text{O}$  (3×25 mL). If

precipitation did still not take place, the solvent was removed under reduced pressure and the crude product was purified by flash column chromatography, eluting with  $\text{CH}_2\text{Cl}_2/\text{MeOH}$ .

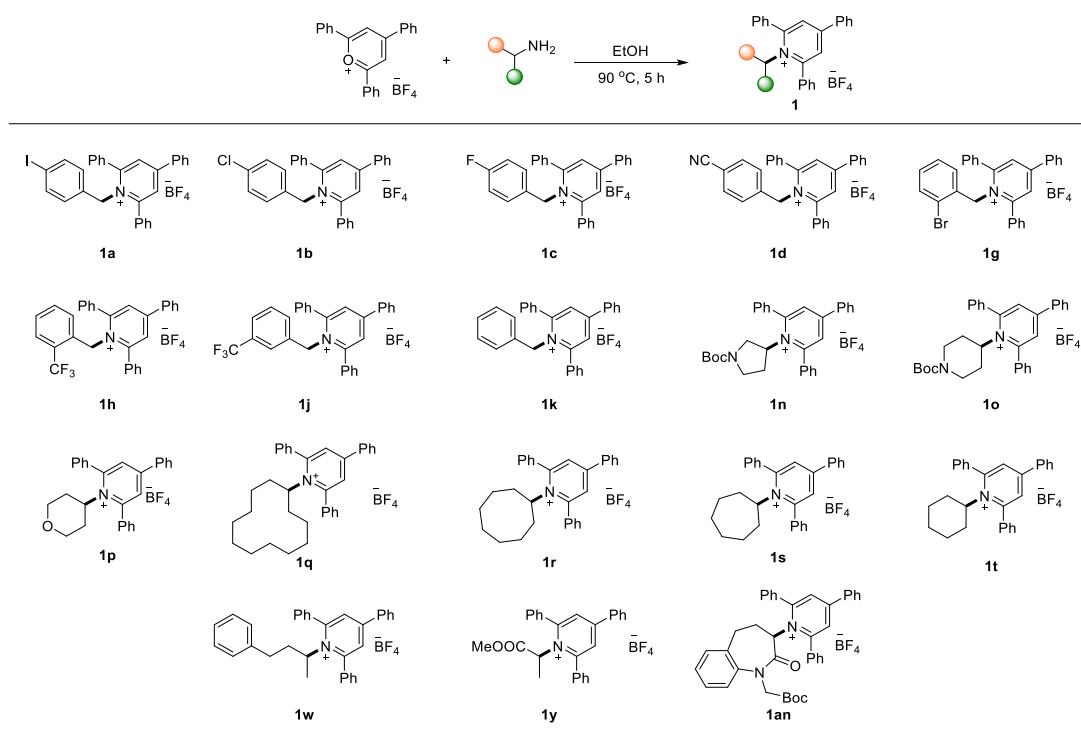

**Amine hydrochlorides as starting materials:** The corresponding amine hydrochloride (3.0 mmol, 1.2 equiv.) was weighed into a 25 mL Schlenk tube containing a magnetic stirring bar. EtOH (2.5 mL, 1.0 M) and  $\text{Et}_3\text{N}$  (3.0 mmol, 1.2 equiv.) were added successively. The resulting suspension was stirred at room temperature for 30 min. 2,4,6-Triphenylpyrylium tetrafluoroborate (2.5 mmol, 1.0 equiv.) was added in one portion and the reaction mixture was stirred and heated at reflux in an oil bath at 90 °C for 5 h. If precipitation occurred during the reaction, the solid was collected by filtration and washed with  $\text{H}_2\text{O}$  ( $3 \times 25$  mL, to remove  $\text{Et}_3\text{N} \cdot \text{HCl}$  salts) and  $\text{Et}_2\text{O}$  ( $3 \times 25$  mL). If no precipitation occurred,  $\text{Et}_2\text{O}$  (7.5 mL) was added and the crude mixture was stirred for 1 h. The resulting solid was collected by filtration and washed with  $\text{H}_2\text{O}$  ( $3 \times 25$  mL, to remove  $\text{Et}_3\text{N} \cdot \text{HCl}$  salts) and  $\text{Et}_2\text{O}$  ( $3 \times 25$  mL). If precipitation did still not take place, the solvent was removed under reduced pressure. The crude product was then dissolved in  $\text{CH}_2\text{Cl}_2$ , washed with  $\text{H}_2\text{O}$  and concentrated

under reduced pressure. The crude product was purified by flash column chromatography, eluting with CH<sub>2</sub>Cl<sub>2</sub>/MeOH.

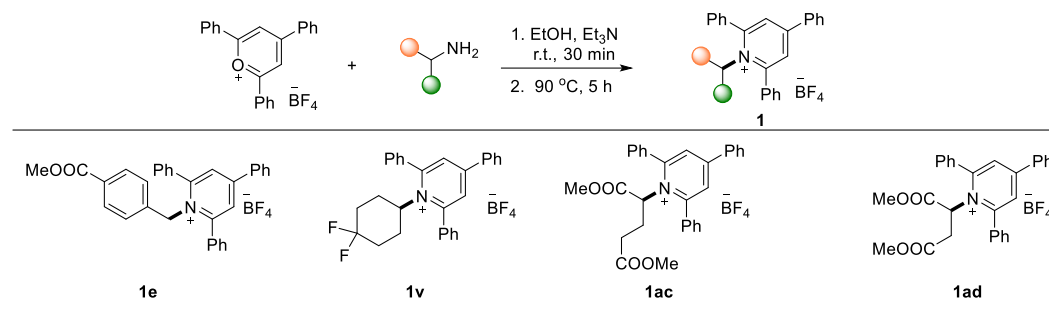

**Procedure 2b.** The triphenylpyrylium tetrafluoroborate (2.5 mmol, 1.0 equiv.) and the corresponding primary amine (2.5 mmol, 1.0 equiv.) was weighed into a 25 ml Schlenk tube containing a magnetic stirring bar. CH<sub>2</sub>Cl<sub>2</sub> (5.0 mL, 0.5 M) and then Et<sub>3</sub>N (1.0 equiv. for free base amines; 2.0 equiv. for amine hydrochloride salts) were added successively. The mixture was stirred at room temperature for 30 min. Acetic acid (2.0 equiv.) was added and the reaction mixture was stirred at room temperature for 6 h. The reaction mixture was diluted with CH<sub>2</sub>Cl<sub>2</sub>, washed successively with aq. HCl (1.0 M, 2×25 mL), aq. NaHCO<sub>3</sub> (sat., 2×25 mL) and brine (3×25 mL), dried over anhydrous Na<sub>2</sub>SO<sub>4</sub>, filtered and concentrated. The crude product was purified by flash column chromatography, eluting with CH<sub>2</sub>Cl<sub>2</sub>/MeOH.

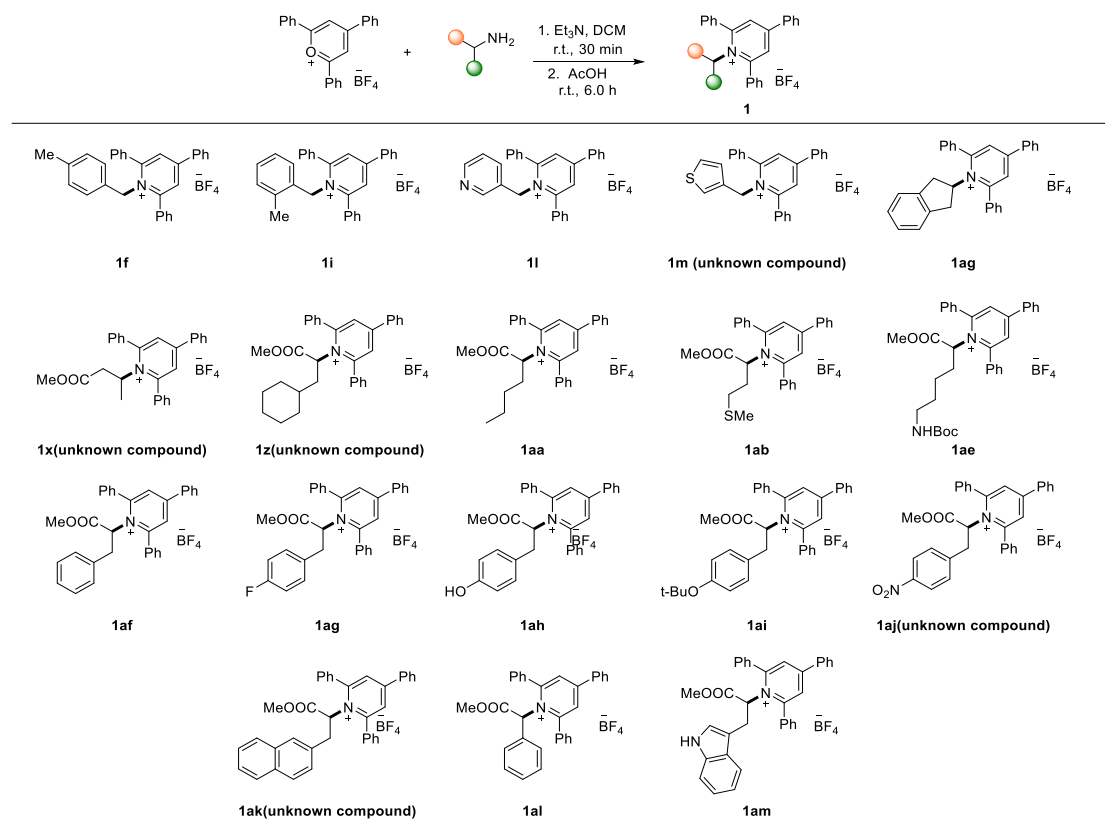

### 3. General procedure for visible light promoted deaminative difluoroalkylation of aliphatic amines.

#### Procedure a:

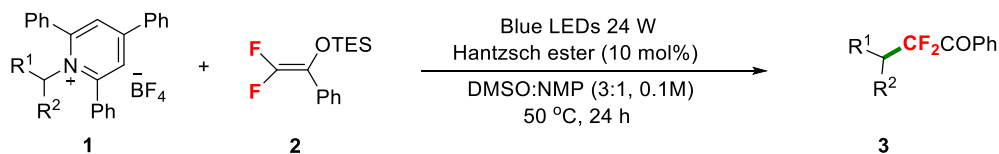

A 25 mL oven-dried Schlenk tube equipped with a magnetic stirrer bar was charged with the Katritzky salt (**1**) (0.2 mmol, 1.0 equiv.), Hantzsch ester (10-50 mol%). The tube was evacuated and backfilled with argon three times, followed by DMSO and NMP (3:1, 2.0 mL) with stirring. Difluoroenoxytriethylsilane (**2**) (0.4 mmol, 2.0 equiv.) was added subsequently. The tube was screw capped and heated to 50 °C under irradiation of blue LEDs. After stirring for 24 h, the reaction mixture was cooled to room temperature, diluted with ethyl acetate, washed with H<sub>2</sub>O and brine, dried over anhydrous Na<sub>2</sub>SO<sub>4</sub>, filtered and concentrated. The residue was purified with silica gel chromatography to provide pure product.

### Procedure b:

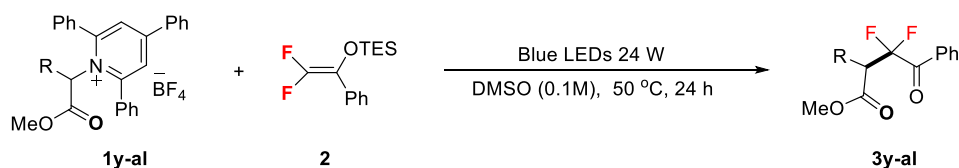

A 25 mL oven-dried Schlenk tube equipped with a magnetic stirrer bar was charged with the Katritzky salt (**1**) (0.2 mmol, 1.0 equiv.). The tube was evacuated and backfilled with argon three times, followed by DMSO (2.0 mL) with stirring. Difluoroenoxytriethylsilane (**2**) (0.4 mmol, 2.0 equiv.) was added subsequently. The tube was screw capped and heated to 50 °C under irradiation of blue LEDs. After stirring for 24 h, the reaction mixture was cooled to room temperature, diluted with ethyl acetate, washed with H<sub>2</sub>O and brine, dried over anhydrous Na<sub>2</sub>SO<sub>4</sub>, filtered and concentrated. The residue was purified with silica gel chromatography to provide pure product.

### 4. Detailed procedure for the gram scale synthesis of compound **3a**, **3af**.

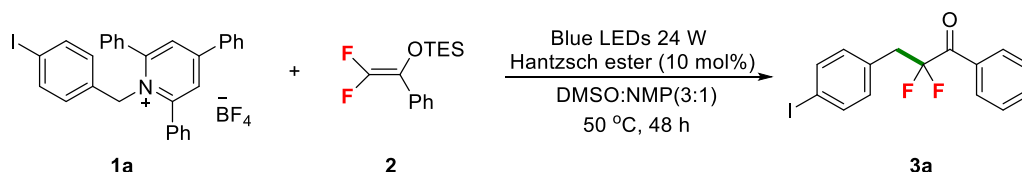

A 25 mL oven-dried Schlenk tube equipped with a magnetic stirrer bar was charged with the **1a** (4.0 mmol, 1.0 equiv.), Hantzsch ester (0.4 mmol, 10 mol%). The tube was evacuated and backfilled with argon three times, followed by DMSO and NMP (3:1, 16.0 mL) were added with stirring. Difluoroenoxytriethylsilane (**2**) (8.0 mmol, 2.0 equiv.) was added subsequently. The tube was screw capped and heated to 50 °C under irradiation of blue LEDs. After stirring for 48 h, the reaction mixture was cooled to room temperature, diluted with ethyl acetate, washed with H<sub>2</sub>O and brine, dried over anhydrous Na<sub>2</sub>SO<sub>4</sub>, filtered and concentrated. The product **3a** (1012 mg, 68% yield) was purified with silica gel chromatography (Petroleum ether/ Dichloromethane = 200:1) as white solid.

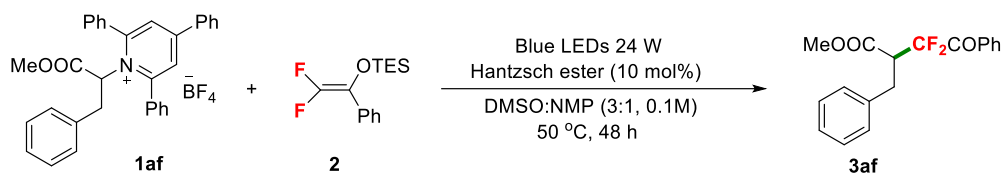

**Procedure a:** A 25 mL oven-dried Schlenk tube equipped with a magnetic stirrer bar was charged with the **1af** (4.0 mmol, 1.0 equiv.), Hantzsch ester (0.4 mmol, 10 mol%). The tube was evacuated and backfilled with argon three times, followed by DMSO and NMP (3:1, 16.0 mL) with stirring. Difluoroenoxytriethylsilane (**2**) (8.0 mmol, 2.0 equiv.) was added subsequently. The tube was screw capped and heated to 50 °C under irradiation of blue LEDs. After stirring for 48 h, the reaction mixture was cooled to room temperature, diluted with ethyl acetate, washed with H<sub>2</sub>O and brine, dried over anhydrous Na<sub>2</sub>SO<sub>4</sub>, filtered and concentrated. The product **3af** (904 mg, 71% yield) was purified with silica gel chromatography (Petroleum ether/ Ethyl acetate = 100:1) as pale yellow oil.

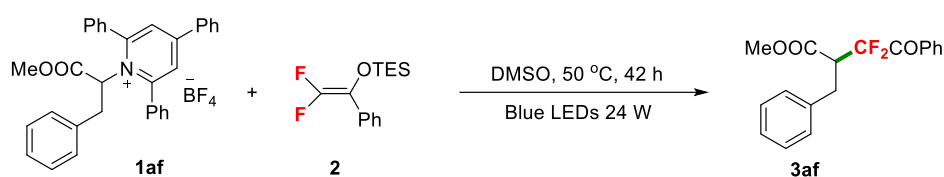

**Procedure b:** A 25 mL oven-dried Schlenk tube equipped with a magnetic stirrer bar was charged with the **1af** (4.0 mmol, 1.0 equiv.). The tube was evacuated and backfilled with argon three times, followed by DMSO (16.0 mL) with stirring. Difluoroenoxytriethylsilane (**2**) (8.0 mmol, 2.0 equiv.) was added subsequently. The tube was screw capped and heated to 50 °C under irradiation of blue LEDs. After stirring for 42 h, the reaction mixture was cooled to room temperature, diluted with ethyl acetate, washed with H<sub>2</sub>O and brine, dried over anhydrous Na<sub>2</sub>SO<sub>4</sub>, filtered and concentrated. The product **3af** (777 mg, 61% yield) was purified with silica gel chromatography (Petroleum ether/ Ethyl acetate = 100:1) as pale yellow oil.



## 5. Mechanism studies.

### 5.1 Addition of radical and SET inhibitors.

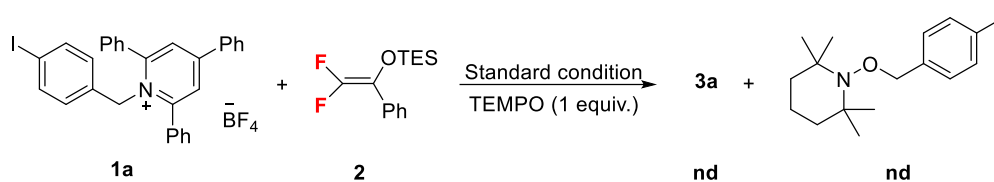

**Typical procedure:** A 25 mL oven-dried Schlenk tube equipped with a magnetic stirrer bar was charged with the Katritzky salt (**1a**) (0.2 mmol, 1.0 equiv.), Hantzsch ester (0.02 mmol, 10 mol%) and TEMPO (0.2 mmol, 1.0 equiv.). The tube was evacuated and backfilled with argon three times, followed by DMSO and NMP (3:1, 2.0 mL) were added with stirring. Difluoroenoxytriethylsilane (**2**) (0.4 mmol, 2.0 equiv.) was added subsequently. The tube was screw capped and heated to 50 °C under irradiation of blue LEDs 24 W. After stirring for 24 h, the reaction mixture was cooled to room temperature, monitored by TLC. The reaction was totally suppressed by the addition of a radical scavenger TEMPO (100 mol%), which suggests that the involvement of radical intermediates is likely during the reaction.

### 5.2 Trapping of intermediates.

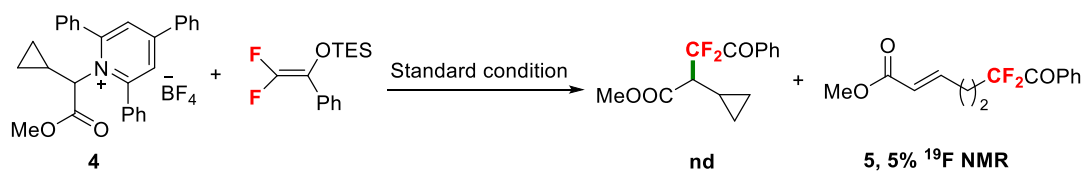

**Typical procedure:** A 25 mL oven-dried Schlenk tube equipped with a magnetic bar was charged with the Katritzky salt (**4**)<sup>[7]</sup> (0.2 mmol, 1.0 equiv.), Hantzsch ester (0.02 mmol, 10 mol%). The tube was evacuated and backfilled with argon three times, followed by DMSO and NMP (3:1, 2.0 mL) were added with stirring. Difluoroenoxytriethylsilane (**2**) (0.4 mmol, 2.0 equiv.) was added subsequently. The tube was screw capped and heated to 50 °C under irradiation of blue LEDs 24 W. After stirring for 24 h, the reaction mixture was cooled to room temperature, diluted with ethyl acetate, washed with H<sub>2</sub>O and brine, dried over anhydrous Na<sub>2</sub>SO<sub>4</sub>, filtered and concentrated. The residue was purified with silica gel chromatography to provide

product **5**<sup>[21]</sup>. (The yield of the crude ring-opened product **5** was determined to be 5% by <sup>19</sup>F-NMR analysis with p-fluorotoluene as an internal standard). <sup>1</sup>H NMR (400 MHz, CDCl<sub>3</sub>) δ 8.11 (d, *J* = 7.6 Hz, 2H), 7.65 (t, *J* = 7.4 Hz, 1H), 7.50 (t, *J* = 8.0 Hz, 2H), 7.02 – 6.95 (m, 1H), 5.90 (dt, *J* = 15.6, 1.5 Hz, 1H), 3.73 (s, 3H), 2.54 – 2.48 (m, 2H), 2.42 – 2.30 (m, 2H). <sup>19</sup>F NMR (376 MHz, CDCl<sub>3</sub>) δ - 100.16 (t, *J* = 17.1 Hz, 2F). <sup>13</sup>C NMR (101 MHz, CDCl<sub>3</sub>) δ 188.8 (t, *J* = 31.8 Hz), 166.7, 146.6, 134.5, 131.6, 130.2 (t, *J* = 3.0 Hz), 128.7, 121.9, 119.1 (t, *J* = 254.9 Hz), 51.6, 32.1 (t, *J* = 23.1 Hz), 24.3 (t, *J* = 5.1 Hz).

### 5.3 UV-Vis spectroscopic measurement.

**Solution 1:** **1a** (0.2 mmol, 1.0 equiv.) were added in DMSO/NMP (4.0 mL, 3:1). The mixture was stirred for 20 minutes and filtered.

**Solution 2:** Hantzsch ester (0.2 mol, 1.0 equiv.) was added in DMSO/NMP (4.0 mL, 3:1). The mixture was stirred for 20 minutes and filtered.

**Solution 3:** **1a** (0.2 mmol, 1.0 equiv.) combine Hantzsch ester (0.2 mol, 1 equiv.) was added in DMSO/NMP (4.0 mL, 3:1). The mixture was stirred for 20 minutes and filtered. Performed on UV visible spectrophotometer, recorded in 1 cm path quartz cuvettes using T6 Xinyue visible spectrophotometer (PERSEETM), DMSO/NMP (3:1) as blank sample.

| A<br>λ (nm) | <b>1a</b> | HE    | <b>1a + HE</b> | A<br>λ (nm) | <b>1a</b> | HE    | <b>1a + HE</b> |
|-------------|-----------|-------|----------------|-------------|-----------|-------|----------------|
| <b>440</b>  | 0.213     | 0.505 | 0.852          | <b>530</b>  | 0.075     | 0.007 | 0.078          |
| <b>450</b>  | 0.183     | 0.052 | 0.295          | <b>540</b>  | 0.063     | 0.007 | 0.065          |
| <b>460</b>  | 0.164     | 0.013 | 0.217          | <b>550</b>  | 0.053     | 0.008 | 0.055          |
| <b>470</b>  | 0.15      | 0.009 | 0.187          | <b>560</b>  | 0.046     | 0.007 | 0.047          |
| <b>480</b>  | 0.136     | 0.007 | 0.163          | <b>570</b>  | 0.041     | 0.008 | 0.041          |
| <b>490</b>  | 0.124     | 0.007 | 0.143          | <b>580</b>  | 0.036     | 0.007 | 0.036          |
| <b>500</b>  | 0.111     | 0.007 | 0.124          | <b>590</b>  | 0.032     | 0.007 | 0.032          |
| <b>510</b>  | 0.099     | 0.007 | 0.108          | <b>600</b>  | 0.03      | 0.008 | 0.03           |
| <b>520</b>  | 0.088     | 0.007 | 0.094          | <b>610</b>  | 0.027     | 0.007 | 0.026          |

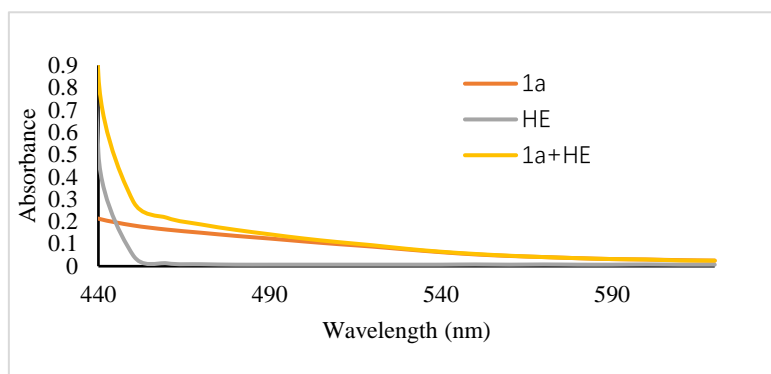

Solution 1: **1af** (0.2 mmol, 1.0 equiv.) were added in DMSO (3.0 mL). The mixture was stirred for 20 minutes and filtered.

Solution 2: Difluoroenoxytriethylsilane (0.4 mol, 2.0 equiv.) was added in DMSO (3.0 mL). The mixture was stirred for 20 minutes and filtered.

Solution 3: **1af** (0.2 mmol, 1.0 equiv.) combine Difluoroenoxytriethylsilane (0.4 mol, 1 equiv.) was added in DMSO (3.0 mL). The mixture was stirred for 20 minutes and filtered.

Performed on UV visible spectrophotometer, recorded in 1 cm path quartz cuvettes using T6 Xinyue visible spectrophotometer (PERSEE<sup>TM</sup>), DMSO (3.0 mL) as blank sample.

| A<br>λ (nm) | <b>1af</b> | 2     | <b>1af + 2</b> | A<br>λ (nm) | <b>1af</b> | 2     | <b>1af + 2</b> |
|-------------|------------|-------|----------------|-------------|------------|-------|----------------|
| <b>420</b>  | 0.535      | 0.019 | 0.472          | <b>520</b>  | 0.037      | 0.01  | 0.058          |
| <b>430</b>  | 0.499      | 0.017 | 0.422          | <b>530</b>  | 0.029      | 0.011 | 0.052          |
| <b>440</b>  | 0.447      | 0.016 | 0.36           | <b>540</b>  | 0.022      | 0.01  | 0.046          |
| <b>450</b>  | 0.339      | 0.014 | 0.262          | <b>550</b>  | 0.019      | 0.01  | 0.043          |
| <b>460</b>  | 0.234      | 0.013 | 0.178          | <b>560</b>  | 0.016      | 0.01  | 0.04           |
| <b>470</b>  | 0.17       | 0.011 | 0.133          | <b>570</b>  | 0.014      | 0.01  | 0.039          |
| <b>480</b>  | 0.123      | 0.011 | 0.106          | <b>580</b>  | 0.013      | 0.01  | 0.037          |
| <b>490</b>  | 0.092      | 0.011 | 0.091          | <b>590</b>  | 0.012      | 0.01  | 0.036          |
| <b>500</b>  | 0.067      | 0.011 | 0.078          | <b>600</b>  | 0.011      | 0.01  | 0.036          |
| <b>510</b>  | 0.049      | 0.011 | 0.068          | <b>610</b>  | 0.011      | 0.01  | 0.035          |

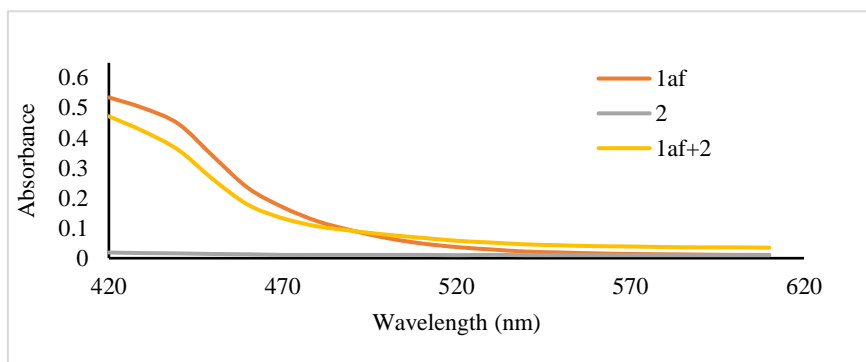

#### 5.4 The time profile of reactions.

**Typical procedure:** To 25 mL oven-dried Schlenk tube (No.1-8) equipped with a magnetic stirrer bar was charged with the Katritzky salt (**1a**) (0.2 mmol, 1.0 equiv.), Hantzsch ester (0.04 mmol, 20 mol%). The tube was evacuated and backfilled with argon three times, followed by DMSO and NMP (3:1, 2.0 mL) with stirring. Difluoroenoxytriethylsilane (**2**) (0.4 mmol, 2.0 equiv.) was added subsequently. The tube 1 was determined by  $^1\text{H}$  NMR and  $^{19}\text{F}$  NMR immediately. The tube 2-8 were heated to 50 °C and stirring for 2-24 h. After stirring for 2 h, 4 h, 8 h, 12 h, 16 h, 20 h or 24 h, the reaction mixture was cooled to room temperature, then monitored by  $^1\text{H}$  NMR and  $^{19}\text{F}$  NMR.

| Entry | Time (h) | Yield of <b>3a</b> ( $^{19}\text{F}$ -NMR) | <b>6</b> : <b>HE</b> |
|-------|----------|--------------------------------------------|----------------------|
| 1     | 0        | 0                                          | 0                    |
| 2     | 2        | 2                                          | 0.024                |
| 3     | 4        | 14                                         | 0.017                |
| 4     | 8        | 19                                         | 0.04                 |
| 5     | 12       | 30                                         | 0.57                 |
| 6     | 16       | 46                                         | 0.65                 |
| 7     | 20       | 82                                         | 0.72                 |
| 8     | 24       | 82.5                                       | 0.76                 |

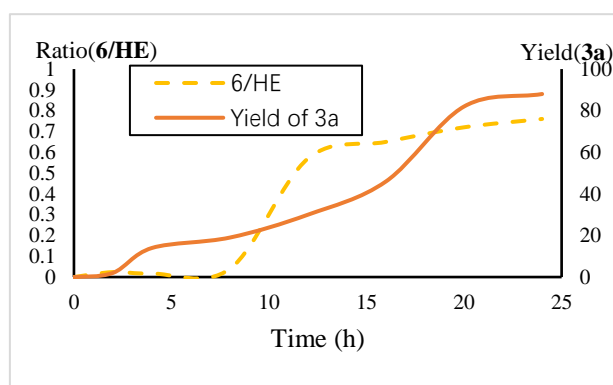

## 5.5 Determination of the quantum yield [1].

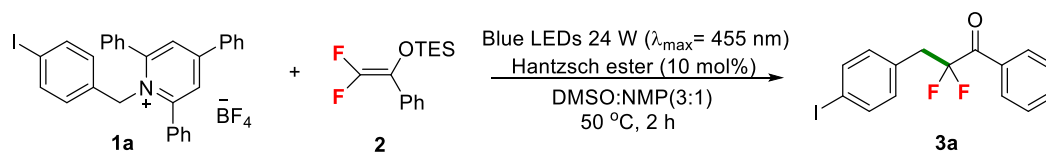

A 25 mL oven-dried Schlenk tube equipped with a magnetic stirrer bar was charged with the **1a** (0.6 mmol, 1.0 equiv.), Hantzsch ester (0.06 mmol, 10 mol%). The tube was evacuated and backfilled with argon three times, followed by DMSO and NMP (3:1, 6.0 mL) with stirring. Difluoroenoxytriethylsilane (**2**) (1.2 mmol, 2.0 equiv.) was added subsequently. The tube was stored protected from light. 2.0 mL of this stock solution was transferred to a quartz cuvette under an argon atmosphere. The cuvette was capped with a stopper and sealed with parafilm. The reaction mixture was heated to 50 °C under irradiation of blue LEDs ( $\lambda_{\max} = 455$  nm). After stirring for 2 h, the yield determined by HPLC analysis with styrene as an internal standard. The yield of the desired product **3a** was determined to be 4.7 % ( $8.68 \times 10^{-6}$  mol). The reaction quantum yield ( $\Phi$ ) was determined using eq 1.

$$\Phi = \frac{\text{mol of product}}{\text{photon flux} \cdot t \cdot f} \quad (1)$$
$$\Phi = \frac{8.68 \times 10^{-6} \text{ mol}}{2.5 \times 10^{-9} \text{ E s}^{-1} \cdot 7200 \cdot 0.943} = 0.51$$

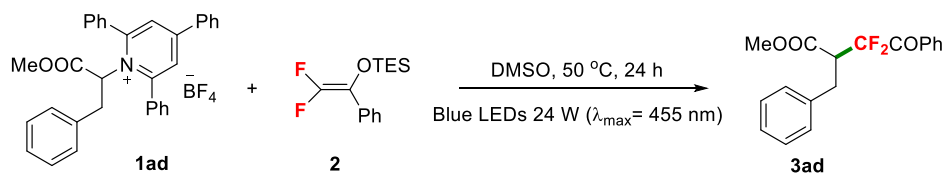

A 25 mL oven-dried Schlenk tube equipped with a magnetic stirrer bar was charged with the **1af** (0.6 mmol, 1.0 equiv.). The tube was evacuated and backfilled with argon three times, followed by DMSO (6.0 mL) with stirring. Difluoroenoxytriethylsilane (**2**) (1.2 mmol, 2.0 equiv.) was added subsequently. The

tube was stored protected from light. 2.0 mL of this stock solution was transferred to a quartz cuvette under an argon atmosphere. The cuvette was capped with a stopper and sealed with parafilm. The reaction mixture was heated to 50 °C under irradiation of blue LEDs ( $\lambda_{\text{max}} = 455 \text{ nm}$ ). After stirring for 2 h, the yield determined by HPLC analysis with styrene as an internal standard. The yield of the desired product 3ad was determined to be 1.3 % ( $2.34 \times 10^{-6} \text{ mol}$ ). The reaction quantum yield ( $\Phi$ ) was determined using eq 1.

$$\Phi = \frac{\text{mol of product}}{\text{photon flux} \cdot t \cdot f} \quad (1)$$

$$\Phi = \frac{2.34 \times 10^{-6} \text{ mol}}{2.5 \times 10^{-9} \text{ E s}^{-1} \cdot 7200 \cdot 0.868} = 0.15$$

## 6. Data for compounds 1, 3, 6.

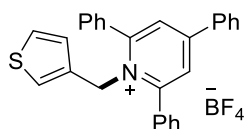

**2,4,6-triphenyl-1-(thiophen-2-ylmethyl)pyridin-1-ium tetrafluoroborate (1m).** The product (651.0 mg, 53% yield) was purified with silica gel chromatography (DCM/ MeOH = 100:1) as yellow solid.  $^1\text{H}$  NMR (400 MHz,  $\text{CDCl}_3$ )  $\delta$  7.84 (s, 2H), 7.72 – 7.71 (m, 2H), 7.66 (d,  $J = 6.8 \text{ Hz}$ , 4H), 7.52 – 7.47 (m, 9H), 6.06 (s, 1H), 6.39 (s, 1H), 6.26 (s, 1H), 5.71 (s, 2H).  $^{19}\text{F}$  NMR (376 MHz,  $\text{CDCl}_3$ )  $\delta$  -152.62 (minor,  $^{11}\text{BF}_4$ ), -152.67 (major,  $^{10}\text{BF}_4$ ).  $^{13}\text{C}$  NMR (101 MHz,  $\text{CDCl}_3$ )  $\delta$  157.0, 156.1, 133.8, 133.6, 132.6, 132.2, 130.9, 129.6, 129.1, 128.9, 128.0, 126.9, 126.5, 125.5, 123.7, 54.0. MS (ESI):  $m/z$  (%) 404.1 ( $[\text{M}-\text{BF}_4]^+$ , 100). HRMS (ESI): calculated for  $\text{C}_{28}\text{H}_{22}\text{NS}$  ( $[\text{M}-\text{BF}_4]^+$ ): 404.1467; Found: 404.1469.

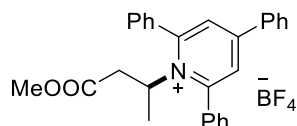

**1-(4-methoxy-4-oxobutan-2-yl)-2,4,6-triphenylpyridin-1-ium tetrafluoroborate (1x).** The product (520.1 mg, 42% yield) was purified with silica gel chromatography (DCM/ MeOH = 100:1) as yellow solid.  $^1\text{H}$  NMR (400 MHz,  $\text{CDCl}_3$ )  $\delta$  7.77 (s, 2H),

7.70 – 7.64 (m, 6H), 7.60 – 7.55 (m, 6H), 7.49 – 7.46 (m, 1H), 7.41 – 7.37 (m, 2H), 5.41 – 5.32 (m, 1H), 3.54 (s, 3H), 2.84 – 2.78 (m, 1H), 2.33 – 2.27 (m, 1H), 1.47 (d,  $J = 7.2$  Hz, 3H).  $^{19}\text{F}$  NMR (376 MHz,  $\text{CDCl}_3$ )  $\delta$  -152.94 (minor,  $^{11}\text{BF}_4$ ), -153.00 (major,  $^{10}\text{BF}_4$ ).  $^{13}\text{C}$  NMR (101 MHz,  $\text{CDCl}_3$ )  $\delta$  169.7, 155.1, 133.7, 133.4, 131.9, 130.9, 129.4, 129.1 – 128.6 (m), 128.1, 61.6, 52.1, 39.5, 22.0 (three carbon signal missing due to signal broadening). MS (ESI):  $m/z$  (%) 408.2 ( $[\text{M}-\text{BF}_4]^+$ , 100). HRMS (ESI): calculated for  $\text{C}_{28}\text{H}_{26}\text{NO}_2$  ( $[\text{M}-\text{BF}_4]^+$ ): 408.1958; Found: 408.1958.

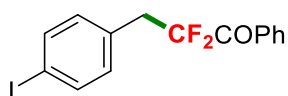

**2,2-difluoro-3-(4-iodophenyl)-1-phenylpropan-1-one (3a).** The product (60.3 mg, 81% yield) was purified with silica gel chromatography (Petroleum ether/ Dichloromethane = 200:1) as white solid.  $^1\text{H}$  NMR (400 MHz,  $\text{CDCl}_3$ )  $\delta$  8.05 (d,  $J = 8.0$  Hz, 2H), 7.66 – 7.61 (m, 3H), 7.48 (t,  $J = 7.6$  Hz, 2H), 7.06 (d,  $J = 8.0$  Hz, 2H), 3.46 (t,  $J = 17.8$  Hz, 2H).  $^{19}\text{F}$  NMR (376 MHz,  $\text{CDCl}_3$ )  $\delta$  -98.48 (t,  $J = 17.1$  Hz, 2F).  $^{13}\text{C}$  NMR (101 MHz,  $\text{CDCl}_3$ )  $\delta$  189.0 (t,  $J = 31.4$  Hz), 137.5, 134.4, 132.8, 131.8 (t,  $J = 2.7$  Hz), 130.9 (t,  $J = 3.6$  Hz), 130.1 (t,  $J = 3.3$  Hz), 128.6, 118.0 (t,  $J = 256.3$  Hz), 93.4, 39.5 (t,  $J = 23.4$  Hz). MS (EI):  $m/z$  (%) 372 ( $\text{M}^+$ ), 105 (100). HRMS (EI): calculated for  $\text{C}_{15}\text{H}_{11}\text{F}_2\text{IO}$ : 371.9823; Found: 371.9819.

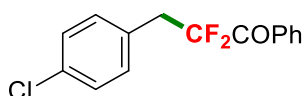

**3-(4-Chlorophenyl)-2,2-difluoro-1-phenylpropan-1-one (3b).** This compound is known<sup>[2]</sup>. The product (44.3 mg, 79% yield) was purified with silica gel chromatography (Petroleum ether/ Dichloromethane = 200:1) as white solid.  $^1\text{H}$  NMR (400 MHz,  $\text{CDCl}_3$ )  $\delta$  8.05 (d,  $J = 7.6$  Hz, 2H), 7.63 (t,  $J = 7.4$  Hz, 1H), 7.48 (t,  $J = 8.0$  Hz, 2H), 7.31 – 7.24 (m, 4H), 3.49 (t,  $J = 17.6$  Hz, 2H).  $^{19}\text{F}$  NMR (376 MHz,  $\text{CDCl}_3$ )  $\delta$  -98.58 (t,  $J = 17.7$  Hz, 2F).  $^{13}\text{C}$  NMR (101 MHz,  $\text{CDCl}_3$ )  $\delta$  189.1 (t,  $J = 31.4$  Hz), 134.4,

133.7, 132.2, 131.9 (t,  $J = 2.5$  Hz), 130.1 (t,  $J = 3.4$  Hz), 129.8 (t,  $J = 3.7$  Hz), 128.7, 128.6, 118.1 (t,  $J = 256.2$  Hz), 39.3 (t,  $J = 23.4$  Hz).

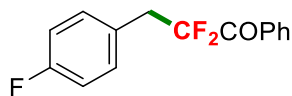

**2,2-Difluoro-3-(4-fluorophenyl)-1-phenylpropan-1-one (3c).** This compound is known<sup>[2]</sup>. The product (40.2 mg, 76% yield) was purified with silica gel chromatography (Petroleum ether/ Dichloromethane = 200:1) as white solid. <sup>1</sup>H NMR (400 MHz, CDCl<sub>3</sub>) δ 8.04 (d,  $J = 7.6$  Hz, 2H), 7.62 (t,  $J = 7.4$  Hz, 1H), 7.48 (t,  $J = 7.8$  Hz, 2H), 7.29 – 7.27 (m, 2H), 7.01 (t,  $J = 8.6$  Hz, 2H), 3.49 (t,  $J = 17.8$  Hz, 2H). <sup>19</sup>F NMR (376 MHz, CDCl<sub>3</sub>) δ -98.80 (t,  $J = 17.7$  Hz, 2F), -114.95 – -115.02 (m, 1F). <sup>13</sup>C NMR (101 MHz, CDCl<sub>3</sub>) δ 189.3 (t,  $J = 31.3$  Hz), 162.4 (d,  $J = 247.3$  Hz), 134.3, 132.4 (d,  $J = 8.2$  Hz), 132.0 (t,  $J = 2.5$  Hz), 130.1 (t,  $J = 3.4$  Hz), 128.6, 127.0 – 126.9 (m), 118.2 (t,  $J = 256.3$  Hz), 115.3 (d,  $J = 21.6$  Hz), 39.2 (t,  $J = 23.5$  Hz).

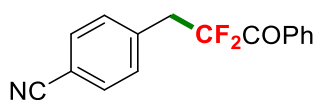

**4-(2,2-Difluoro-3-oxo-3-phenylpropyl)benzonitrile (3d).** This compound is known<sup>[2]</sup>. The product (46.1 mg, 85% yield) was purified with silica gel chromatography (Petroleum ether/ Ethyl acetate = 50:1) as white solid. <sup>1</sup>H NMR (400 MHz, CDCl<sub>3</sub>) δ 8.06 (d,  $J = 8.4$  Hz, 2H), 7.66 – 7.62 (m, 3H), 7.51 – 7.44 (m, 4H), 3.58 (t,  $J = 17.4$  Hz, 2H). <sup>19</sup>F NMR (376 MHz, CDCl<sub>3</sub>) δ -97.98 (t,  $J = 17.5$  Hz, 2F). <sup>13</sup>C NMR (101 MHz, CDCl<sub>3</sub>) δ 188.5 (t,  $J = 31.5$  Hz), 137.0 (t,  $J = 3.5$  Hz), 134.6, 132.1, 131.7, 131.6, 130.1 (t,  $J = 3.3$  Hz), 128.7, 118.6, 117.9 (t,  $J = 257.1$  Hz), 111.6, 39.8 (t,  $J = 23.4$  Hz).

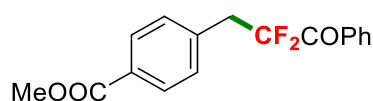



**Methyl 4-(2,2-difluoro-3-oxo-3-phenylpropyl)benzoate (3e).** This compound is known<sup>[2]</sup>. The product (51.1 mg, 84% yield) was purified with silica gel chromatography (Petroleum ether/ Ethyl acetate = 50:1) as white solid. <sup>1</sup>H NMR (400 MHz, CDCl<sub>3</sub>) δ 8.04 (d, *J* = 7.6 Hz, 2H), 7.99 (d, *J* = 8.0 Hz, 2H), 7.61 (t, *J* = 7.4 Hz, 1H), 7.46 (t, *J* = 7.8 Hz, 2H), 7.39 (d, *J* = 8.0 Hz, 2H), 3.90 (s, 3H), 3.57 (t, *J* = 17.6 Hz, 2H). <sup>19</sup>F NMR (376 MHz, CDCl<sub>3</sub>) δ -98.24 (t, *J* = 17.7 Hz, 2F). <sup>13</sup>C NMR (101 MHz, CDCl<sub>3</sub>) δ 188.9 (t, *J* = 31.4 Hz), 166.8, 136.6 (t, *J* = 3.5 Hz), 134.4, 131.8 (t, *J* = 2.8 Hz), 130.9, 130.1 (t, *J* = 3.3 Hz), 129.6, 129.4, 128.6, 118.1 (t, *J* = 256.5 Hz), 52.1, 39.9 (t, *J* = 23.4 Hz).

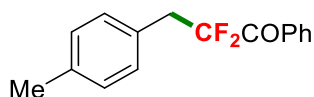

**2,2-Difluoro-1-phenyl-3-(p-tolyl)propan-1-one (3f).** This compound is known<sup>[2]</sup>. The product (33.3 mg, 64% yield) was purified with silica gel chromatography (Petroleum ether/ Dichloromethane = 200:1) as white solid. <sup>1</sup>H NMR (400 MHz, CDCl<sub>3</sub>) δ 8.06 (d, *J* = 8.0 Hz, 2H), 7.62 (d, *J* = 7.4 Hz, 1H), 7.48 (t, *J* = 7.6 Hz, 2H), 7.22 – 7.14 (m, 4H), 3.50 (t, *J* = 18.0 Hz, 2H), 2.35 (s, 3H). <sup>19</sup>F NMR (376 MHz, CDCl<sub>3</sub>) δ -98.79 (t, *J* = 17.9 Hz, 2F). <sup>13</sup>C NMR (101 MHz, CDCl<sub>3</sub>) δ 189.5 (t, *J* = 31.2 Hz), 137.3, 134.2, 132.1 (t, *J* = 2.7 Hz), 130.7, 130.1 (t, *J* = 3.3 Hz), 129.1, 128.6, 128.0 (t, *J* = 3.6 Hz), 118.3 (t, *J* = 255.5 Hz), 39.7 (t, *J* = 23.3 Hz), 21.1.

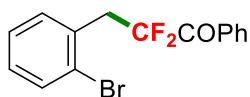

**3-(2-Bromophenyl)-2,2-difluoro-1-phenylpropan-1-one (3g).** This compound is known<sup>[2]</sup>. The product (50.1 mg, 77% yield) was purified with silica gel chromatography (Petroleum ether/ Dichloromethane = 200:1) as pale yellow oil. <sup>1</sup>H NMR (400 MHz, CDCl<sub>3</sub>) δ 8.11 (d, *J* = 8.0 Hz, 2H), 7.65 – 7.59 (m, 2H), 7.49 (t, *J* = 7.6 Hz, 2H), 7.42 (d, *J* = 7.6 Hz, 1H), 7.30 (t, *J* = 7.6 Hz, 1H), 7.17 (t, *J* = 7.8 Hz, 1H), 3.76 (t, *J* = 18.0 Hz, 2H). <sup>19</sup>F NMR (376 MHz, CDCl<sub>3</sub>) δ -98.86 (t, *J* = 18.0 Hz, 2F).

$^{13}\text{C}$  NMR (101 MHz,  $\text{CDCl}_3$ )  $\delta$  189.1 (t,  $J = 30.9$  Hz), 134.4, 133.1, 132.6, 131.8 (t,  $J = 2.6$  Hz), 131.5 (t,  $J = 2.6$  Hz), 130.2 (t,  $J = 3.4$  Hz), 129.3, 128.6, 127.3, 126.1, 118.2 (t,  $J = 256.7$  Hz), 39.3 (t,  $J = 23.1$  Hz).

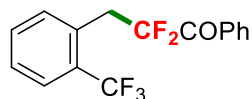

**2,2-difluoro-1-phenyl-3-(2-(trifluoromethyl)phenyl)propan-1-one (3h).** This compound is known<sup>[2]</sup>. The product (45.9 mg, 73% yield) was purified with silica gel chromatography (Petroleum ether/ Dichloromethane = 200:1) as pale yellow oil.  $^1\text{H}$  NMR (400 MHz,  $\text{CDCl}_3$ )  $\delta$  8.12 (d,  $J = 8.4$  Hz, 2H), 7.71 (d,  $J = 7.6$  Hz, 1H), 7.64 (t,  $J = 7.4$  Hz, 1H), 7.58 – 7.41 (m, 5H), 3.77 (t,  $J = 18.2$  Hz, 2H).  $^{19}\text{F}$  NMR (376 MHz,  $\text{CDCl}_3$ )  $\delta$  -58.64 (t,  $J = 5.8$  Hz, 3F), -98.34 – -98.45 (m, 2F).  $^{13}\text{C}$  NMR (101 MHz,  $\text{CDCl}_3$ )  $\delta$  189.0 (t,  $J = 31.4$  Hz), 134.4, 133.1, 131.6, 130.5, 130.2 (t,  $J = 3.4$  Hz), 130.0, 128.7, 127.7, 126.4 (q,  $J = 5.7$  Hz), 124.2 (q,  $J = 275.2$  Hz), 117.8 (t,  $J = 256.9$  Hz), 35.7 (t,  $J = 22.7$  Hz).

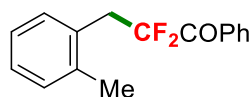

**2,2-difluoro-1-phenyl-3-(o-tolyl)propan-1-one (3i).** This compound is known<sup>[2]</sup>. The product (40.1 mg, 77% yield) was purified with silica gel chromatography Petroleum ether/ Dichloromethane = 200:1) as colorless oil.  $^1\text{H}$  NMR (400 MHz,  $\text{CDCl}_3$ )  $\delta$  8.06 (d,  $J = 7.6$  Hz, 2H), 7.62 (t,  $J = 7.4$  Hz, 1H), 7.48 (t,  $J = 7.8$  Hz, 2H), 7.27 (d,  $J = 7.6$  Hz, 1H), 7.22 - 7.15 (m, 3H), 3.57 (t,  $J = 18.4$  Hz, 2H), 2.38 (s, 3H).  $^{19}\text{F}$  NMR (376 MHz,  $\text{CDCl}_3$ )  $\delta$  -98.67 (t,  $J = 18.4$  Hz, 2F).  $^{13}\text{C}$  NMR (101 MHz,  $\text{CDCl}_3$ )  $\delta$  189.8 (t,  $J = 31.3$  Hz), 138.0, 134.2, 132.1 (t,  $J = 2.4$  Hz), 131.7, 130.5, 130.1 (t,  $J = 3.4$  Hz), 129.8 (t,  $J = 2.8$  Hz), 128.6, 127.7, 125.8, 118.8 (t,  $J = 255.7$  Hz), 36.7 (t,  $J = 23.3$  Hz), 19.9 (t,  $J = 1.9$  Hz).

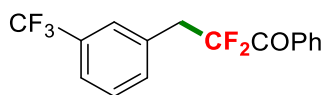

**2,2-Difluoro-1-phenyl-3-(3-(trifluoromethyl)phenyl)propan-1-one (3j).** This compound is known<sup>[2]</sup>. The product (54.7 mg, 87% yield) was purified with silica gel chromatography (Petroleum ether/ Dichloromethane = 200:1) as pale yellow oil. <sup>1</sup>H NMR (400 MHz, CDCl<sub>3</sub>) δ 8.08 (d, *J* = 7.2 Hz, 2H), 7.65 – 7.44 (m, 7H), 3.58 (t, *J* = 17.8 Hz, 2H). <sup>19</sup>F NMR (376 MHz, CDCl<sub>3</sub>) δ -62.68 (s, 3F), -98.54 (t, *J* = 17.7 Hz, 2F). <sup>13</sup>C NMR (101 MHz, CDCl<sub>3</sub>) δ 188.8 (t, *J* = 31.4 Hz), 134.5, 134.3, 132.4 (t, *J* = 3.5 Hz), 131.7 (t, *J* = 3.0 Hz), 130.8 (q, *J* = 32.3 Hz), 130.2 (t, *J* = 3.3 Hz), 128.8, 128.7, 127.6 (q, *J* = 3.8 Hz), 124.5 (q, *J* = 3.8 Hz), 123.9 (q, *J* = 273.6 Hz), 118.0 (t, *J* = 256.6 Hz), 39.6 (t, *J* = 23.4 Hz).

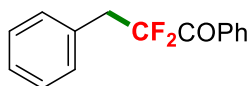

**2,2-difluoro-1,3-diphenylpropan-1-one (3k).** This compound is known<sup>[2]</sup>. The product (36.4 mg, 74% yield) was purified with silica gel chromatography Petroleum ether/ Dichloromethane = 200:1) as white solid. <sup>1</sup>H NMR (400 MHz, CDCl<sub>3</sub>) δ 8.05 (d, *J* = 8.0 Hz, 2H), 7.62 (t, *J* = 7.6 Hz, 1H), 7.47 (t, *J* = 7.8 Hz, 2H), 7.33 (s, 5H), 3.54 (t, *J* = 17.8 Hz, 2H). <sup>19</sup>F NMR (376 MHz, CDCl<sub>3</sub>) δ -98.68 (t, *J* = 17.9 Hz, 2F). <sup>13</sup>C NMR (101 MHz, CDCl<sub>3</sub>) δ 189.5 (t, *J* = 31.3 Hz), 134.2, 132.1 (t, *J* = 2.6 Hz), 131.2 (t, *J* = 3.7 Hz), 130.8, 130.1 (t, *J* = 3.4 Hz), 128.6, 128.4, 127.6, 118.3 (t, *J* = 255.7 Hz), 40.1 (t, *J* = 23.4 Hz).

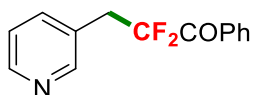

**2,2-Difluoro-1-phenyl-3-(pyridin-3-yl)propan-1-one (3l).** This compound is known<sup>[2]</sup>. The product (40.1 mg, 81% yield) was purified with silica gel chromatography (Petroleum ether/ Ethyl acetate = 10:1) as pale yellow oil. <sup>1</sup>H NMR (400 MHz, CDCl<sub>3</sub>) δ 8.58 – 8.55 (m, 2H), 8.07 (d, *J* = 7.6 Hz, 2H), 7.70 (d, *J* = 7.6 Hz, 1H), 7.64 (t, *J* = 7.4 Hz, 1H), 7.49 (t, *J* = 7.8 Hz, 2H), 7.30 – 7.28 (m, 1H), 3.53 (t, *J* =

17.6 Hz, 2H).  $^{19}\text{F}$  NMR (376 MHz,  $\text{CDCl}_3$ )  $\delta$  -98.34 (t,  $J$  = 17.7 Hz, 2F).  $^{13}\text{C}$  NMR (101 MHz,  $\text{CDCl}_3$ )  $\delta$  188.6 (t,  $J$  = 31.6 Hz), 151.5, 148.7, 138.4, 134.5, 131.6, 130.1 (t,  $J$  = 3.3 Hz), 128.7, 127.4 (t,  $J$  = 3.0 Hz), 123.3, 117.9 (t,  $J$  = 256.6 Hz), 37.2 (t,  $J$  = 23.7 Hz).

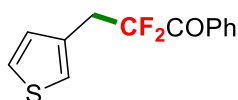

**2,2-difluoro-1-phenyl-3-(thiophen-2-yl)propan-1-one (3m).** The product (37.8 mg, 75% yield) was purified with silica gel chromatography (Petroleum ether/Dichloromethane = 120:1) as pale yellow oil.  $^1\text{H}$  NMR (400 MHz,  $\text{CDCl}_3$ )  $\delta$  8.04 (d,  $J$  = 7.6 Hz, 2H), 7.62 (t,  $J$  = 7.4 Hz, 1H), 7.47 (t,  $J$  = 7.8 Hz, 2H), 7.29 – 7.27 (m, 1H), 7.19 (s, 1H), 7.06 (d,  $J$  = 4.8 Hz, 1H), 3.58 (t,  $J$  = 17.4 Hz, 2H).  $^{19}\text{F}$  NMR (376 MHz,  $\text{CDCl}_3$ )  $\delta$  -98.47 (t,  $J$  = 17.5 Hz, 2F).  $^{13}\text{C}$  NMR (101 MHz,  $\text{CDCl}_3$ )  $\delta$  189.4 (t,  $J$  = 31.4 Hz), 134.2, 132.1, 131.0 (t,  $J$  = 4.1 Hz), 130.1 (t,  $J$  = 3.4 Hz), 129.5, 128.6, 125.6, 124.9, 118.1 (t,  $J$  = 256.0 Hz), 34.8 (t,  $J$  = 24.2 Hz). MS (ESI):  $m/z$  (%) 275 ( $[\text{M}+\text{Na}]^+$ , 100). HRMS (ESI): calculated for  $\text{C}_{13}\text{H}_{10}\text{F}_2\text{OSNa}$  ( $[\text{M}+\text{Na}]^+$ ): 275.0420; Found: 275.0313.

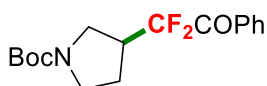

**Tert-butyl 3-(1,1-difluoro-2-oxo-2-phenylethyl)pyrrolidine-1-carboxylate (3n).** This compound is known<sup>[2]</sup>. The product (49.5 mg, 76% yield) was purified with silica gel chromatography (Petroleum ether/ Ethyl acetate = 20:1) as pale yellow oil.  $^1\text{H}$  NMR (400 MHz,  $\text{CDCl}_3$ )  $\delta$  8.11 (d,  $J$  = 7.2 Hz, 2H), 7.64 (t,  $J$  = 7.4 Hz, 1H), 7.50 (t,  $J$  = 7.6 Hz, 2H), 3.68 – 3.14 (m, 6H), 2.16 – 2.08 (m, 1H), 1.45 (s, 9H).  $^{19}\text{F}$  NMR (376 MHz,  $\text{CDCl}_3$ )  $\delta$  -105.61 – -105.94 (m, 2F).  $^{13}\text{C}$  NMR (101 MHz,  $\text{CDCl}_3$ )  $\delta$  188.7 (t,  $J$  = 32.1 Hz), 154.3, 134.6, 131.7, 130.2 (t,  $J$  = 3.3 Hz), 128.7, 119.1 (t,  $J$  = 257.1 Hz), 79.5, 45.23, 45.17, 41.7 (br), 28.5, 24.6.

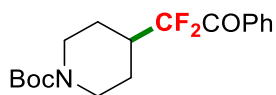

**Tert-butyl 4-(1,1-difluoro-2-oxo-2-phenylethyl)piperidine-1-carboxylate (3o).** This compound is known<sup>[2]</sup>. The product (58.4 mg, 86% yield) was purified with silica gel chromatography (Petroleum ether/ Ethyl acetate = 20:1) as pale yellow oil. <sup>1</sup>H NMR (400 MHz, CDCl<sub>3</sub>) δ 8.07 (d, *J* = 8.0 Hz, 2H), 7.63 (t, *J* = 7.4 Hz, 1H), 7.49 (t, *J* = 7.6 Hz, 2H), 4.19 (br, 2H), 2.69 (t, *J* = 11.8 Hz, 2H), 2.50 – 2.37 (m, 1H), 1.78 (d, *J* = 12.8 Hz, 2H), 1.52 – 1.47 (m, 2H), 1.44 (s, 9H). <sup>19</sup>F NMR (376 MHz, CDCl<sub>3</sub>) δ -107.87 (t, *J* = 13.3 Hz, 2F). <sup>13</sup>C NMR (101 MHz, CDCl<sub>3</sub>) δ 189.5 (t, *J* = 31.0 Hz), 154.6, 134.3, 132.4, 130.0 (t, *J* = 3.5 Hz), 128.7, 119.4 (t, *J* = 256.5 Hz), 79.6, 43.1 (br), 40.2 (t, *J* = 22.2 Hz), 28.4, 24.2.

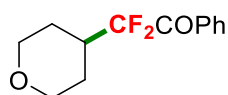

**2,2-Difluoro-1-phenyl-2-(tetrahydro-2H-pyran-4-yl)ethan-1-one (3p).** This compound is known<sup>[2]</sup>. The product (22.6 mg, 47% yield) was purified with silica gel chromatography (Petroleum ether/ Ethyl acetate = 50:1) as pale yellow oil. <sup>1</sup>H NMR (400 MHz, CDCl<sub>3</sub>) δ 8.09 (d, *J* = 8.4 Hz, 2H), 7.64 (t, *J* = 7.6 Hz, 1H), 7.51 (t, *J* = 7.6 Hz, 2H), 4.04 (d, *J* = 11.2 Hz, 2H), 3.46 – 3.38 (m, 2H), 2.64 – 2.49 (m, 1H), 1.74 – 1.61 (m, 4H). <sup>19</sup>F NMR (376 MHz, CDCl<sub>3</sub>) δ -108.57 (d, *J* = 14.3 Hz, 2F). <sup>13</sup>C NMR (101 MHz, CDCl<sub>3</sub>) δ 189.4 (t, *J* = 31.0 Hz), 134.3, 132.4 (t, *J* = 2.3 Hz), 130.0 (t, *J* = 3.6 Hz), 128.7, 119.2 (t, *J* = 256.3 Hz), 67.0, 39.1 (t, *J* = 22.4 Hz), 24.8 (t, *J* = 4.4 Hz).

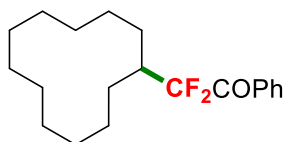

**2-Cyclododecyl-2,2-difluoro-1-phenylethan-1-one (3q).** This compound is known<sup>[2]</sup>. The product (45.8 mg, 71% yield) was purified with silica gel chromatography (Petroleum ether/ Dichloromethane = 200:1) as colorless oil. <sup>1</sup>H NMR (400 MHz,

CDCl<sub>3</sub>)  $\delta$  8.08 (d,  $J$  = 8.0 Hz, 2H), 7.62 (t,  $J$  = 7.4 Hz, 1H), 7.49 (t,  $J$  = 7.8 Hz, 2H), 2.53 – 2.41 (m, 1H), 1.61 – 1.23 (m, 22H). <sup>19</sup>F NMR (376 MHz, CDCl<sub>3</sub>)  $\delta$  -105.25 (d,  $J$  = 16.5 Hz, 2F). <sup>13</sup>C NMR (101 MHz, CDCl<sub>3</sub>)  $\delta$  190.4 (t,  $J$  = 30.6 Hz), 134.0, 132.8, 129.9 (t,  $J$  = 3.3 Hz), 128.6, 121.6 (t,  $J$  = 256.7 Hz), 38.4 (t,  $J$  = 20.6 Hz), 24.3, 23.6, 23.5, 23.4, 22.4.

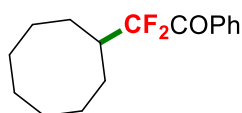

**2-Cyclooctyl-2,2-difluoro-1-phenylethan-1-one (3r).** This compound is known<sup>[2]</sup>. The product (32.5 mg, 61% yield) was purified with silica gel chromatography (Petroleum ether/ Dichloromethane = 200:1) as colorless oil. <sup>1</sup>H NMR (400 MHz, CDCl<sub>3</sub>)  $\delta$  8.08 (d,  $J$  = 8.0 Hz, 2H), 7.62 (t,  $J$  = 7.4 Hz, 1H), 7.49 (t,  $J$  = 7.8 Hz, 2H), 2.59 – 2.46 (m, 1H), 1.80 – 1.75 (m, 4H), 1.61 – 1.49 (m, 10H). <sup>19</sup>F NMR (376 MHz, CDCl<sub>3</sub>)  $\delta$  -107.04 (d,  $J$  = 15.0 Hz, 2F). <sup>13</sup>C NMR (101 MHz, CDCl<sub>3</sub>)  $\delta$  190.5 (t,  $J$  = 31.0 Hz), 134.0, 132.9, 129.9 (t,  $J$  = 3.5 Hz), 128.6, 121.4 (t,  $J$  = 256.9 Hz), 41.2 (t,  $J$  = 20.4 Hz), 26.6, 26.2, 25.6 (t,  $J$  = 4.1 Hz), 25.4.

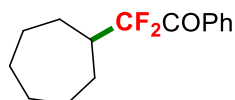

**2-Cycloheptyl-2,2-difluoro-1-phenylethan-1-one (3s).** This compound is known<sup>[2]</sup>. The product (36.3 mg, 72% yield) was purified with silica gel chromatography (Petroleum ether/ Dichloromethane = 200:1) as colorless oil. <sup>1</sup>H NMR (400 MHz, CDCl<sub>3</sub>)  $\delta$  8.08 (d,  $J$  = 6.8 Hz, 2H), 7.62 (t,  $J$  = 7.4 Hz, 1H), 7.49 (t,  $J$  = 7.8 Hz, 2H), 2.50 – 2.35 (m, 1H), 1.88 – 1.82 (m, 2H), 1.78 – 1.72 (m, 2H), 1.60 – 1.41 (m, 8H). <sup>19</sup>F NMR (376 MHz, CDCl<sub>3</sub>)  $\delta$  -106.95 (d,  $J$  = 16.5 Hz, 2F). <sup>13</sup>C NMR (101 MHz, CDCl<sub>3</sub>)  $\delta$  190.5 (t,  $J$  = 30.8 Hz), 134.0, 132.9, 129.9 (t,  $J$  = 3.6 Hz), 128.6, 121.1 (t,  $J$  = 256.6 Hz), 43.3 (t,  $J$  = 20.7 Hz), 28.2, 26.49, 26.46, 26.4.

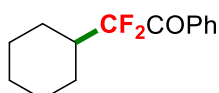

**2-Cyclohexyl-2,2-difluoro-1-phenylethan-1-one (3t).** This compound is known<sup>[2]</sup>. The product (41.5 mg, 87% yield) was purified with silica gel chromatography (Petroleum ether/ Dichloromethane = 200:1) as colorless oil. <sup>1</sup>H NMR (400 MHz, CDCl<sub>3</sub>) δ 8.08 (d, *J* = 8.0 Hz, 2H), 7.62 (t, *J* = 7.6 Hz, 1H), 7.49 (t, *J* = 7.8 Hz, 2H), 2.31 – 2.18 (m, 1H), 1.82 (t, *J* = 9.2 Hz, 4H), 1.70 – 1.68 (m, 1H), 1.34 – 1.16 (m, 5H). <sup>19</sup>F NMR (376 MHz, CDCl<sub>3</sub>) δ -108.55 (d, *J* = 15.0 Hz, 2F). <sup>13</sup>C NMR (101 MHz, CDCl<sub>3</sub>) δ 190.4 (t, *J* = 30.4 Hz), 134.0, 132.9 (t, *J* = 1.8 Hz), 130.0 (t, *J* = 3.6 Hz), 128.6, 120.3 (t, *J* = 255.5 Hz), 42.1 (t, *J* = 21.8 Hz), 25.9, 25.4, 24.8 (t, *J* = 4.2 Hz).

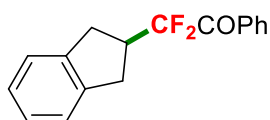

**2-(2,3-Dihydro-1H-inden-2-yl)-2,2-difluoro-1-phenylethan-1-one (3u).** This compound is known<sup>[2]</sup>. The product (40.8 mg, 75% yield) was purified with silica gel chromatography (Petroleum ether/ Dichloromethane = 200:1) as colorless oil. <sup>1</sup>H NMR (400 MHz, CDCl<sub>3</sub>) δ 8.17 (d, *J* = 7.6 Hz, 2H), 7.66 (t, *J* = 7.4 Hz, 1H), 7.53 (t, *J* = 7.8 Hz, 2H), 7.24 – 7.16 (m, 4H), 3.54 – 3.37 (m, 1H), 3.21 (d, *J* = 1.6 Hz, 2H), 3.18 (d, *J* = 2.8 Hz, 2H). <sup>19</sup>F NMR (376 MHz, CDCl<sub>3</sub>) δ -105.6 (d, *J* = 16.5 Hz, 2F). <sup>13</sup>C NMR (101 MHz, CDCl<sub>3</sub>) δ 189.3 (t, *J* = 31.8 Hz), 141.3, 134.3, 132.2 (t, *J* = 2.3 Hz), 130.2 (t, *J* = 3.4 Hz), 128.7, 126.6, 124.4, 120.2 (t, *J* = 255.7 Hz), 42.4 (t, *J* = 22.5 Hz), 32.8 (t, *J* = 4.6 Hz).

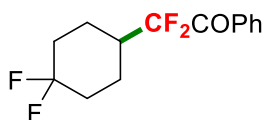

**2-(4,4-difluorocyclohexyl)-2,2-difluoro-1-phenylethan-1-one (3v).** This compound is known<sup>[2]</sup>. The product (39.5 mg, 72% yield) was purified with silica gel chromatography (Petroleum ether/ Dichloromethane = 200:1) as white solid. <sup>1</sup>H NMR (400 MHz, CDCl<sub>3</sub>) δ 8.09 (d, *J* = 7.6 Hz, 2H), 7.65 (t, *J* = 7.4 Hz, 1H), 7.51 (t, *J* = 7.6 Hz, 2H), 2.46 – 2.33 (m, 1H), 2.22 – 2.18 (m, 2H), 1.97 – 1.95 (m, 2H), 1.83 – 1.63 (m, 4H). <sup>19</sup>F NMR (376 MHz, CDCl<sub>3</sub>) δ -92.23 (d, *J* = 237.3 Hz, 1F), -102.42 – -103.23 (m,

1F), -107.02 (d,  $J = 14.3$  Hz, 2F).  $^{13}\text{C}$  NMR (101 MHz,  $\text{CDCl}_3$ )  $\delta$  189.4 (t,  $J = 31.1$  Hz), 134.4, 132.3 (t,  $J = 2.1$  Hz), 130.1 (t,  $J = 3.6$  Hz), 128.7, 122.5 (dd,  $J = 243.5, 240.9$  Hz), 119.5 (td,  $J = 257.0, 2.2$  Hz), 39.6 (td,  $J = 22.0, 1.1$  Hz), 32.7 (dd,  $J = 25.7, 23.8$  Hz), 21.5 – 21.3(m).

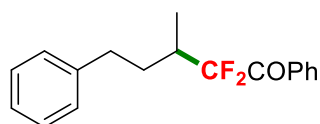

**2,2-Difluoro-3-methyl-1,5-diphenylpentan-1-one (3w).** This compound is known<sup>[2]</sup>. The product (35.2 mg, 61% yield) was purified with silica gel chromatography (Petroleum ether/ Dichloromethane = 150:1) as colorless oil.  $^1\text{H}$  NMR (400 MHz,  $\text{CDCl}_3$ )  $\delta$  8.03 (d,  $J = 8.0$  Hz, 2H), 7.62 (t,  $J = 7.4$  Hz, 1H), 7.47 (t,  $J = 7.8$  Hz, 2H), 7.26 (t,  $J = 7.6$  Hz, 2H), 7.19 – 7.14 (m, 3H), 2.84 – 2.77 (m, 1H), 2.62 – 2.54 (m, 1H), 2.49 – 2.35 (m, 1H), 2.05 – 1.96 (m, 1H), 1.67 – 1.58 (m, 1H), 1.13 (d,  $J = 6.8$  Hz, 3H).  $^{19}\text{F}$  NMR (376 MHz,  $\text{CDCl}_3$ )  $\delta$  -107.58 (t,  $J = 16.7$  Hz, 2F).  $^{13}\text{C}$  NMR (101 MHz,  $\text{CDCl}_3$ )  $\delta$  190.0 (t,  $J = 30.5$  Hz), 141.3, 134.1, 132.6, 129.9 (t,  $J = 3.6$  Hz), 128.6, 128.4, 128.3, 126.0, 120.7 (t,  $J = 256.4$  Hz), 37.0 (t,  $J = 21.7$  Hz), 33.0, 30.6 (t,  $J = 3.8$  Hz), 12.2 (t,  $J = 5.1$  Hz).

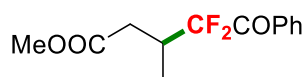

**Methyl-4,4-difluoro-3-methyl-5-oxo-5-phenylpentanoate (3x).** The product (33.3 mg, 65% yield) was purified with silica gel chromatography (Petroleum ether/ Ethyl acetate = 100:1) as pale yellow oil.  $^1\text{H}$  NMR (400 MHz,  $\text{CDCl}_3$ )  $\delta$  8.09 (d,  $J = 8.0$  Hz, 2H), 7.64 (t,  $J = 7.2$  Hz, 1H), 7.50 (t,  $J = 7.6$  Hz, 2H), 3.70 (s, 3H), 3.13 – 2.97 (m, 1H), 2.77 (m, 1H), 2.35 (m, 1H), 1.11 (d,  $J = 6.8$  Hz, 3H).  $^{19}\text{F}$  NMR (376 MHz,  $\text{CDCl}_3$ )  $\delta$  -105.41 (dd,  $J = 278.4, 11.8$  Hz, 1F), -110.67 (dd,  $J = 278.4, 17.9$  Hz, 1F).  $^{13}\text{C}$  NMR (101 MHz,  $\text{CDCl}_3$ )  $\delta$  189.1 (t,  $J = 30.6$  Hz), 172.1, 134.4, 132.2 (t,  $J = 2.0$  Hz), 130.0 (t,  $J = 3.4$  Hz), 128.7, 119.8 (dd,  $J = 257.8, 256.3$  Hz), 51.9, 34.7 (t,  $J = 22.2$  Hz), 34.2



(t,  $J = 4.4$  Hz), 13.2 (t,  $J = 4.8$  Hz). MS (ESI):  $m/z$  (%) 279 ( $[M+Na]^+$ , 100). HRMS (ESI): calculated for  $C_{13}H_{14}F_2O_3Na$  ( $[M+Na]^+$ ): 279.0911; Found: 279.0803.

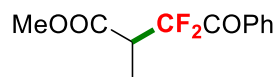

**Methyl-3,3-difluoro-2-methyl-4-oxo-4-phenylbutanoate (3y).** The product (32.9 mg, 68% yield, procedure b) was purified with silica gel chromatography (Petroleum ether/Ethyl acetate = 100:1) as pale yellow oil.  $^1H$  NMR (400 MHz,  $CDCl_3$ )  $\delta$  8.08 (d,  $J = 8.0$  Hz, 2H), 7.64 (t,  $J = 7.8$  Hz, 1H), 7.50 (t,  $J = 7.8$  Hz, 2H), 3.69 (s, 3H), 3.63 – 3.50 (m, 1H), 1.46 (d,  $J = 7.6$  Hz, 3H).  $^{19}F$  NMR (376 MHz,  $CDCl_3$ )  $\delta$  -101.41 (dd,  $J = 293.3$ , 9.0 Hz, 1F), -109.42 (dd,  $J = 293.3$ , 19.9 Hz, 1F).  $^{13}C$  NMR (101 MHz,  $CDCl_3$ )  $\delta$  189.2 (t,  $J = 30.8$  Hz), 170.7 (d,  $J = 10.8$  Hz), 134.2, 132.1, 130.0, 128.6, 117.7 (dd,  $J = 264.1$ , 254.8 Hz), 52.3, 43.6 (t,  $J = 23.7$  Hz), 9.8 (t,  $J = 4.6$  Hz). MS (ESI):  $m/z$  (%) 265 ( $[M+Na]^+$ , 100). HRMS (ESI): calculated for  $C_{12}H_{12}F_2O_3Na$  ( $[M+Na]^+$ ): 265.0755; Found: 265.0647.

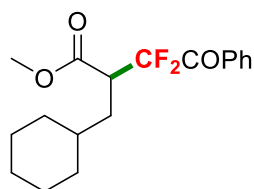

**Methyl-2-(cyclohexylmethyl)-3,3-difluoro-4-oxo-4-phenylbutanoate (3z).** The product (48.7 mg, 75% yield, procedure b) was purified with silica gel chromatography (Petroleum ether/Ethyl acetate = 150:1) as pale yellow oil.  $^1H$  NMR (400 MHz,  $CDCl_3$ )  $\delta$  8.08 (d,  $J = 8.0$  Hz, 2H), 7.64 (t,  $J = 7.4$  Hz, 1H), 7.50 (t,  $J = 7.8$  Hz, 2H), 3.71 (s, 3H), 3.56 – 3.45 (m, 1H), 1.89 – 1.82 (m, 2H), 1.70 – 1.58 (m, 4H), 1.25 – 1.13 (m, 4H), 1.00 – 0.83 (m, 3H).  $^{19}F$  NMR (376 MHz,  $CDCl_3$ )  $\delta$  -102.24 (dd,  $J = 292.9$ , 13.5 Hz, 1F), -104.29 (dd,  $J = 293.3$ , 15.8 Hz, 1F).  $^{13}C$  NMR (101 MHz,  $CDCl_3$ )  $\delta$  188.8 (t,  $J = 30.9$  Hz), 170.5 (d,  $J = 8.6$  Hz), 134.3, 132.0 (t,  $J = 2.8$  Hz), 130.1 (t,  $J = 3.4$  Hz), 128.7, 118.0 (dd,  $J = 262.7$ , 258.2 Hz), 52.2, 46.7 (dd,  $J = 23.4$ , 21.2 Hz), 35.3, 33.7,

32.8 (t,  $J = 3.1$  Hz), 32.1, 26.4, 26.0 (d,  $J = 15.4$  Hz). MS (ESI):  $m/z$  (%) 325 ( $[M+H]^+$ , 100). HRMS (ESI): calculated for  $C_{18}H_{23}F_2O_3$  ( $[M+H]^+$ ): 325.1611; Found: 325.1537.

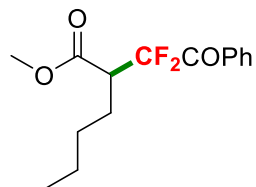

**Methyl-2-(1,1-difluoro-2-oxo-2-phenylethyl)hexanoate (3aa).** The product (40.9 mg, 72% yield, procedure b) was purified with silica gel chromatography (Petroleum ether/Ethyl acetate = 150:1) as pale yellow oil.  $^1H$  NMR (400 MHz,  $CDCl_3$ )  $\delta$  8.08 (d,  $J = 8.0$  Hz, 2H), 7.63 (t,  $J = 7.4$  Hz, 1H), 7.49 (t,  $J = 7.8$  Hz, 2H), 3.71 (s, 3H), 3.44 – 3.33 (m, 1H), 1.93 – 1.79 (m, 2H), 1.43 – 1.33 (m, 4H), 0.91 (t,  $J = 6.8$  Hz, 3H).  $^{19}F$  NMR (376 MHz,  $CDCl_3$ )  $\delta$  -101.70 (dd,  $J = 294.6, 11.5$  Hz, 1F), -104.80 (dd,  $J = 294.8, 16.5$  Hz, 1F).  $^{13}C$  NMR (101 MHz,  $CDCl_3$ )  $\delta$  188.9 (dd,  $J = 31.6, 30.6$  Hz), 170.3 (d,  $J = 8.6$  Hz), 134.3, 132.0 (t,  $J = 2.9$  Hz), 130.1 (t,  $J = 3.4$  Hz), 128.6, 117.9 (dd,  $J = 263.3, 257.2$  Hz), 52.1, 49.2 (dd,  $J = 23.8, 21.2$  Hz), 29.4, 25.2 (t,  $J = 3.6$  Hz), 22.4, 13.7. MS (ESI):  $m/z$  (%) 307 ( $[M+Na]^+$ , 100). HRMS (ESI): calculated for  $C_{15}H_{18}F_2O_3Na$  ( $[M+Na]^+$ ): 307.1116; Found: 307.1224.

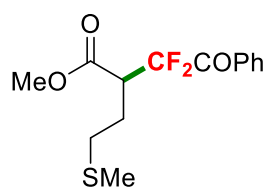

**Methyl 3,3-difluoro-2-(2-(methylthio)ethyl)-4-oxo-4-phenylbutanoate (3ab).** This compound is known<sup>[2]</sup>. The product (49.6 mg, 82% yield, procedure a) was purified with silica gel chromatography (Petroleum ether/Ethyl acetate = 100:1) as pale yellow oil.  $^1H$  NMR (400 MHz,  $CDCl_3$ )  $\delta$  8.06 (d,  $J = 8.4$  Hz, 2H), 7.63 (t,  $J = 7.6$  Hz, 1H), 7.49 (t,  $J = 7.8$  Hz, 2H), 3.75 – 3.62 (m, 4H), 2.69 – 2.67 (m, 1H), 2.60 – 2.55 (m, 1H), 2.28 – 2.15 (m, 2H), 2.10 (s, 3H).  $^{19}F$  NMR (376 MHz,  $CDCl_3$ )  $\delta$  -100.76 (dd,  $J = 293.7, 11.7$  Hz, 1F), -105.22 (dd,  $J = 293.5, 18.2$  Hz, 1F).  $^{13}C$  NMR (101 MHz,  $CDCl_3$ )  $\delta$  188.6

(t,  $J = 30.9$  Hz), 169.7 (d,  $J = 9.6$  Hz), 134.4, 131.8, 130.0 (t,  $J = 3.4$  Hz), 128.7, 117.8 (dd,  $J = 264.0, 257.4$  Hz), 52.3, 47.8 (t,  $J = 22.7$  Hz), 31.6, 24.7, 15.0.

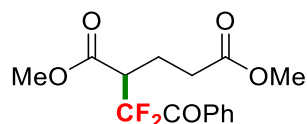

**Dimethyl 2-(1,1-difluoro-2-oxo-2-phenylethyl)pentanedioate (3ac).** This compound is known<sup>[2]</sup>. The product (44.6 mg, 71% yield, procedure a) was purified with silica gel chromatography (Petroleum ether/ Ethyl acetate = 10:1) as pale yellow oil.  $^1\text{H}$  NMR (400 MHz,  $\text{CDCl}_3$ )  $\delta$  8.07 (d,  $J = 7.6$  Hz, 2H), 7.64 (t,  $J = 7.4$  Hz, 1H), 7.50 (t,  $J = 7.8$  Hz, 2H), 3.70 (s, 3H), 3.69 (s, 3H), 3.56 – 3.46 (m, 1H), 2.60 – 2.43 (m, 2H), 2.29 – 2.17 (m, 2H).  $^{19}\text{F}$  NMR (376 MHz,  $\text{CDCl}_3$ )  $\delta$  -100.21 – -100.99 (m, 1F), -105.72 – -106.51 (m, 1F).  $^{13}\text{C}$  NMR (101 MHz,  $\text{CDCl}_3$ )  $\delta$  188.6 (t,  $J = 30.7$  Hz), 172.7, 169.6 (d,  $J = 10.2$  Hz), 134.4, 131.8 (t,  $J = 2.7$  Hz), 130.1 (t,  $J = 2.9$  Hz), 128.7, 117.7 (dd,  $J = 264.6, 256.8$  Hz), 52.3, 51.8, 48.1 (dd,  $J = 23.7, 21.7$  Hz), 31.4, 20.5 (t,  $J = 4.0$  Hz).

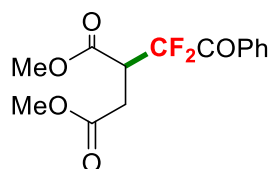

**Dimethyl 2-(1,1-difluoro-2-oxo-2-phenylethyl)succinate (3ad).** This compound is known<sup>[2]</sup>. The product (46.8 mg, 78% yield, procedure a) was purified with silica gel chromatography (Petroleum ether/ Ethyl acetate = 10:1) as pale yellow oil.  $^1\text{H}$  NMR (400 MHz,  $\text{CDCl}_3$ )  $\delta$  8.06 (d,  $J = 7.6$  Hz, 2H), 7.65 (t,  $J = 7.4$  Hz, 1H), 7.51 (t,  $J = 7.8$  Hz, 2H), 4.12 – 4.02 (m, 1H), 3.74 (s, 3H), 3.68 (s, 3H), 3.08 – 3.01 (m, 1H), 2.87 – 2.81 (m, 1H).  $^{19}\text{F}$  NMR (376 MHz,  $\text{CDCl}_3$ )  $\delta$  -99.74 (dd,  $J = 288.0, 10.5$  Hz, 1F), -105.58 (dd,  $J = 288.2, 18.2$  Hz, 1F).  $^{13}\text{C}$  NMR (101 MHz,  $\text{CDCl}_3$ )  $\delta$  188.1 (t,  $J = 29.9$  Hz), 171.2, 168.5 (dd,  $J = 7.3, 2.5$  Hz), 134.5, 131.8, 130.0 (t,  $J = 3.1$  Hz), 128.7, 117.3 (dd,  $J = 262.5, 259.1$  Hz), 52.7, 52.3, 45.9 (t,  $J = 23.1$  Hz), 30.0 (t,  $J = 4.1$  Hz).

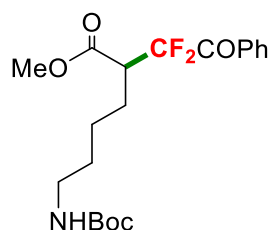

**Methyl 6-((tert-butoxycarbonyl)amino)-2-(1,1-difluoro-2-oxo-2-phenylethyl)hexanoate (3ae).** This compound is known<sup>[21]</sup>. The product (71.1 mg, 89% yield, procedure b) was purified with silica gel chromatography (Petroleum ether/ Ethyl acetate = 10:1) as pale yellow oil. <sup>1</sup>H NMR (400 MHz, CDCl<sub>3</sub>) δ 8.07 (d, *J* = 8.0 Hz, 2H), 7.64 (t, *J* = 7.4 Hz, 1H), 7.49 (t, *J* = 7.8 Hz, 2H), 4.55 (br, 1H), 3.70 (s, 3H), 3.44 – 3.33 (m, 1H), 3.12 (s, 2H), 1.97 – 1.80 (m, 2H), 1.59 – 1.50 (m, 4H), 1.42 (s, 9H). <sup>19</sup>F NMR (376 MHz, CDCl<sub>3</sub>) δ -101.45 (dd, *J* = 295.0, 11.5 Hz, 1F), -104.96 (dd, *J* = 294.8, 17.3 Hz, 1F). <sup>13</sup>C NMR (101 MHz, CDCl<sub>3</sub>) δ 188.7 (t, *J* = 31.1 Hz), 170.1 (d, *J* = 9.5 Hz), 155.9, 134.4, 131.8 (t, *J* = 2.7 Hz), 130.1 (t, *J* = 3.2 Hz), 128.6, 117.7 (dd, *J* = 263.8, 257.2 Hz), 79.1, 52.2, 49.0 (dd, *J* = 23.8, 21.3 Hz), 40.1, 29.8, 28.3, 25.1 (t, *J* = 3.6 Hz), 24.5.

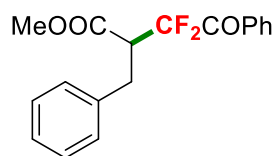

**Methyl 2-benzyl-3,3-difluoro-4-oxo-4-phenylbutanoate (3af).** This compound is known<sup>[21]</sup>. The product (52.2 mg, 82% yield, procedure b) was purified with silica gel chromatography (Petroleum ether/ Ethyl acetate = 70:1) as pale yellow oil. <sup>1</sup>H NMR (400 MHz, CDCl<sub>3</sub>) δ 8.11 (d, *J* = 8.0 Hz, 2H), 7.66 (t, *J* = 7.2 Hz, 1H), 7.51 (t, *J* = 7.6 Hz, 2H), 7.32 – 7.24 (m, 5H), 3.78 – 3.67 (m, 1H), 3.58 (s, 3H), 3.19 (d, *J* = 7.2 Hz, 2H). <sup>19</sup>F NMR (376 MHz, CDCl<sub>3</sub>) δ -101.90 (dd, *J* = 294.9, 13.7 Hz, 1F), -103.69 (dd, *J* = 295.0, 15.2 Hz, 1F). <sup>13</sup>C NMR (101 MHz, CDCl<sub>3</sub>) δ 188.4 (t, *J* = 31.0 Hz), 169.5, 137.4, 134.5, 131.8, 130.1 (t, *J* = 3.3 Hz), 128.9, 128.7, 128.5, 126.8, 117.6 (dd, *J* = 263.4, 259.5 Hz), 52.1, 51.5 (dd, *J* = 23.0, 21.1 Hz), 31.7 (t, *J* = 4.3 Hz).

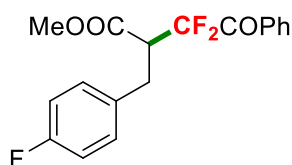

**Methyl 3,3-difluoro-2-(4-fluorobenzyl)-4-oxo-4-phenylbutanoate (3ag).** This compound is known<sup>[2]</sup>. The product (58.5 mg, 87% yield, procedure a) was purified with silica gel chromatography (Petroleum ether/ Ethyl acetate = 100:1) as pale yellow oil. <sup>1</sup>H NMR (400 MHz, CDCl<sub>3</sub>) δ 8.10 (d, *J* = 7.6 Hz, 2H), 7.65 (t, *J* = 7.6 Hz, 1H), 7.51 (t, *J* = 7.8 Hz, 2H), 7.22 – 7.18 (m, 2H), 7.01 – 6.96 (m, 2H), 3.74 – 3.63 (m, 1H), 3.58 (s, 3H), 3.16 (d, *J* = 7.2 Hz, 2H). <sup>19</sup>F NMR (376 MHz, CDCl<sub>3</sub>) δ -101.88 (dd, *J* = 295.9, 13.2 Hz, 1F), -103.55 (dd, *J* = 295.9, 14.7 Hz, 1F), -116.02 (s, 1F). <sup>13</sup>C NMR (101 MHz, CDCl<sub>3</sub>) δ 188.3 (t, *J* = 30.9 Hz), 169.3 (d, *J* = 7.7 Hz), 161.8 (d, *J* = 246.2 Hz), 134.6, 133.1 (d, *J* = 3.1 Hz), 131.7 (t, *J* = 2.9 Hz), 130.5 (d, *J* = 8.1 Hz), 130.1 (t, *J* = 3.4 Hz), 128.7, 117.5 (dd, *J* = 263.5, 259.7 Hz), 115.4 (d, *J* = 21.5 Hz) 52.2, 51.5 (t, *J* = 22.2 Hz), 30.9 (t, *J* = 4.5 Hz).

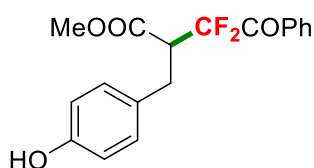

**Methyl 3,3-difluoro-2-(4-hydroxybenzyl)-4-oxo-4-phenylbutanoate (3ah).** The product (58.2 mg, 87% yield, procedure a) was purified with silica gel chromatography (Petroleum ether/ Ethyl acetate = 100:1) as white solid. <sup>1</sup>H NMR (400 MHz, CDCl<sub>3</sub>) δ 8.10 (d, *J* = 7.6 Hz, 2H), 7.65 (t, *J* = 7.6 Hz, 1H), 7.50 (t, *J* = 7.8 Hz, 2H), 7.07 (d, *J* = 8.4 Hz, 2H), 6.74 (d, *J* = 8.4 Hz, 2H), 5.66 (br, 1H), 3.73 – 3.62 (m, 1H), 3.58 (s, 3H), 3.12 – 3.10 (m, 2H). <sup>19</sup>F NMR (376 MHz, CDCl<sub>3</sub>) δ -102.04 (dd, *J* = 295.5, 13.9 Hz, 1F), -103.40 (dd, *J* = 295.5, 15.4 Hz, 1F). <sup>13</sup>C NMR (101 MHz, CDCl<sub>3</sub>) δ 188.5 (t, *J* = 31.1 Hz), 169.9 (d, *J* = 7.3 Hz), 154.6, 134.6, 131.7, 130.2 (t, *J* = 3.4 Hz), 130.1, 129.1, 128.7, 117.5 (t, *J* = 261.4 Hz), 115.4, 52.2, 51.7 (t, *J* = 21.9 Hz), 30.9 (t, *J* = 4.4 Hz). MS (ESI): *m/z* (%) 357 ([M+Na]<sup>+</sup>, 100). HRMS (ESI): calculated for C<sub>18</sub>H<sub>16</sub>F<sub>2</sub>O<sub>4</sub>Na ([M+Na]<sup>+</sup>): 357.1017; Found: 357.0908.

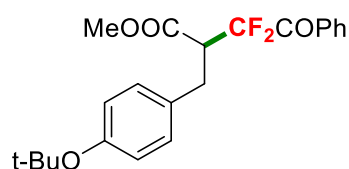

**Methyl -2-(4-(tert-butoxy)benzyl)-3,3-difluoro-4-oxo-4-phenylbutanoate (3ai).**

This compound is known<sup>[2]</sup>. The product (66.4 mg, 85% yield, procedure b) was purified with silica gel chromatography (Petroleum ether/ Ethyl acetate = 100:1) as pale yellow oil. <sup>1</sup>H NMR (400 MHz, CDCl<sub>3</sub>) δ 8.10 (d, *J* = 7.6 Hz, 2H), 7.64 (t, *J* = 7.4 Hz, 1H), 7.50 (t, *J* = 7.8 Hz, 2H), 7.11 (d, *J* = 8.4 Hz, 2H), 6.92 (d, *J* = 8.4 Hz, 2H), 3.74 – 3.63 (m, 1H), 3.54 (s, 3H), 3.15 (s, 1H), 3.13 (d, *J* = 2.8 Hz, 1H). <sup>19</sup>F NMR (376 MHz, CDCl<sub>3</sub>) δ -101.99 (dd, *J* = 295.5, 13.5 Hz, 1F), -103.72 (dd, *J* = 295.2, 15.4 Hz, 1F). <sup>13</sup>C NMR (101 MHz, CDCl<sub>3</sub>) δ 188.4 (t, *J* = 30.9 Hz), 169.5 (d, *J* = 8.2 Hz), 154.1, 134.5, 132.2, 131.8 (t, *J* = 2.7 Hz), 130.1 (t, *J* = 3.2 Hz), 129.3, 128.7, 124.2, 117.5 (dd, *J* = 263.2, 259.5 Hz), 78.3, 52.0, 51.5 (dd, *J* = 23.0, 20.8 Hz), 31.1 (t, *J* = 4.4 Hz), 28.8.

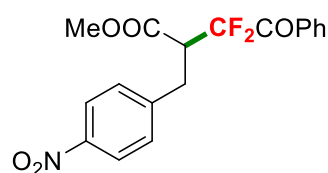

**Methyl-3,3-difluoro-2-(4-nitrobenzyl)-4-oxo-4-phenylbutanoate (3aj).** The product (51.6 mg, 71% yield, procedure b) was purified with silica gel chromatography (Petroleum ether/ Ethyl acetate = 50:1) as pale yellow solid. <sup>1</sup>H NMR (400 MHz, CDCl<sub>3</sub>) δ 8.18 (d, *J* = 8.8 Hz, 2H), 8.10 (d, *J* = 7.6 Hz, 2H), 7.67 (t, *J* = 7.6 Hz, 1H), 7.52 (t, *J* = 7.8 Hz, 2H), 7.43 (d, *J* = 8.4 Hz, 2H), 3.81 – 3.70 (m, 1H), 3.60 (s, 3H), 3.31 – 3.28 (m, 2H). <sup>19</sup>F NMR (376 MHz, CDCl<sub>3</sub>) δ -101.72 (dd, *J* = 297.2, 13.0 Hz, 1F), -104.25 (dd, *J* = 297.0, 15.4 Hz, 1F). <sup>13</sup>C NMR (101 MHz, CDCl<sub>3</sub>) δ 188.1 (t, *J* = 30.8 Hz), 168.8 (d, *J* = 8.0 Hz), 147.0, 145.2, 134.7, 131.4, 130.2, 130.0, 128.8, 123.8, 117.4 (dd, *J* = 264.2, 260.0 Hz), 52.4, 50.7 (t, *J* = 22.2 Hz), 31.5 (t, *J* = 4.3 Hz). MS (ESI): *m/z* (%) 386 ([M+Na]<sup>+</sup>, 100). HRMS (ESI): calculated for C<sub>18</sub>H<sub>15</sub>F<sub>2</sub>NO<sub>5</sub>Na ([M+Na]<sup>+</sup>): 386.0813; Found: 386.0918.

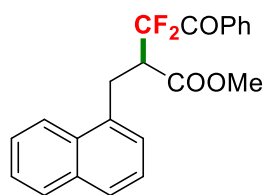

**Methyl-3,3-difluoro-2-(naphthalen-1-ylmethyl)-4-oxo-4-phenylbutanoate(3ak).**

The product (67.8 mg, 92% yield, procedure b) was purified with silica gel chromatography (Petroleum ether/ Ethyl acetate = 100:1) as pale yellow oil. <sup>1</sup>H NMR (400 MHz, CDCl<sub>3</sub>) δ 8.18 – 8.13 (m, 3H), 7.89 (d, *J* = 8.0 Hz, 1H), 7.80 – 7.78 (m, 1H), 7.67 (t, *J* = 7.4 Hz, 1H), 7.60 – 7.50 (m, 4H), 7.43 – 7.39 (m, 2H), 3.89 – 4.00 (m, 1H), 3.78 (dd, *J* = 14.0, 4.0 Hz, 1H), 3.62 – 3.55 (m, 1H), 3.49 (s, 3H). <sup>19</sup>F NMR (376 MHz, CDCl<sub>3</sub>) δ -102.27 (dd, *J* = 297.0, 14.3 Hz, 1F), -103.47 (dd, *J* = 297.2, 14.5 Hz, 1F). <sup>13</sup>C NMR (101 MHz, CDCl<sub>3</sub>) δ 188.4 (t, *J* = 31.1 Hz), 169.5 (d, *J* = 7.2 Hz), 134.6, 134.0, 133.2, 131.8, 131.7, 130.2 (t, *J* = 3.3 Hz), 129.0, 128.8, 127.9, 127.6, 126.5, 125.7, 125.4, 117.8 (dd, *J* = 262.7, 260.1 Hz), 52.1, 50.5 (t, *J* = 21.9 Hz), 29.2 (t, *J* = 4.5 Hz). MS (ESI): *m/z* (%) 369 ([M+H]<sup>+</sup>, 100). HRMS (ESI): calculated for C<sub>22</sub>H<sub>19</sub>F<sub>2</sub>O<sub>3</sub> ([M+H]<sup>+</sup>): 369.1300; Found: 369.1224.

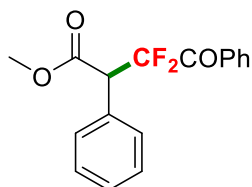

**Methyl-3,3-difluoro-4-oxo-2,4-diphenylbutanoate (3al).** This compound is known<sup>[8]</sup>.

The product (44.4 mg, 73% yield, procedure a) was purified with silica gel chromatography (Petroleum ether/ Ethyl acetate = 150:1) as pale yellow oil. <sup>1</sup>H NMR (400 MHz, CDCl<sub>3</sub>) δ 8.07 (d, *J* = 8.0 Hz, 2H), 7.63 (t, *J* = 7.4 Hz, 1H), 7.49 (t, *J* = 7.8 Hz, 2H), 7.43 – 7.39 (m, 5H), 4.72 (dd, *J* = 22.4, 8.8 Hz, 1H), 3.72 (s, 3H). <sup>19</sup>F NMR (376 MHz, CDCl<sub>3</sub>) δ -99.35 (dd, *J* = 300.2, 8.8 Hz, 1F), -107.53 (dd, *J* = 300.4, 22.2 Hz, 1F). <sup>13</sup>C NMR (101 MHz, CDCl<sub>3</sub>) δ 189.3 (t, *J* = 32.6, 29.5 Hz), 168.9 (d, *J* = 12.8 Hz, 1F), 135.0, 134.4, 132.0 (t, *J* = 3.1 Hz), 130.3, 130.2 (dd, *J* = 4.4, 2.2 Hz), 128.70, 128.67, 128.6, 116.4 (dd, *J* = 267.8, 254.1 Hz), 54.4 (dd, *J* = 25.2, 20.6 Hz), 52.6.

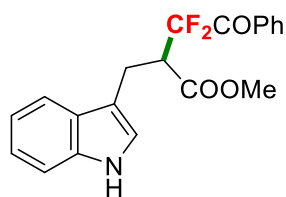

**Methyl 2-((1H-indol-3-yl)methyl)-3,3-difluoro-4-oxo-4-phenylbutanoate (3am).**

The product (36.5 mg, 51% yield) was purified with silica gel chromatography (Petroleum ether/ Ethyl acetate = 5:1) as pale yellow oil. <sup>1</sup>H NMR (400 MHz, CDCl<sub>3</sub>) δ 8.13 (d, *J* = 7.6 Hz, 2H), 8.08 (s, 1H), 7.66 (t, *J* = 7.8 Hz, 2H), 7.52 (t, *J* = 7.8 Hz, 2H), 7.35 (d, *J* = 8.0 Hz, 1H), 7.23 – 7.13 (m, 2H), 7.04 (s, 1H), 3.93 – 3.82 (m, 1H), 3.57 (s, 3H), 3.44 – 3.31 (m, 2H). <sup>19</sup>F NMR (376 MHz, CDCl<sub>3</sub>) δ -102.09 – -103.92 (m, 2F). <sup>13</sup>C NMR (101 MHz, CDCl<sub>3</sub>) δ 188.4 (t, *J* = 30.6 Hz), 169.9, 136.1, 134.4, 131.8, 130.1 (t, *J* = 3.4 Hz), 128.7, 127.0, 122.7, 122.1, 119.6, 118.5, 117.7 (t, *J* = 261.1 Hz), 111.5, 111.2, 52.1, 50.6 (t, *J* = 21.7 Hz), 21.7 (t, *J* = 4.8 Hz). MS (ESI): *m/z* (%) 380 ([M+Na]<sup>+</sup>, 100). HRMS (ESI): calculated for C<sub>20</sub>H<sub>17</sub>F<sub>2</sub>NO<sub>3</sub>Na ([M+Na]<sup>+</sup>): 380.1176; Found: 380.1068.

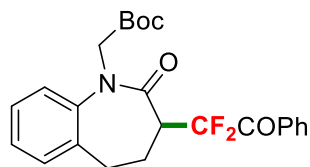

**Tert-butyl 2-(3-(1,1-difluoro-2-oxo-2-phenylethyl)-2-oxo-2,3,4,5-tetrahydro-1H-benzo[b]azepin-1-yl)acetate (3an).**

The product (37.8 mg, 44% yield) was purified with silica gel chromatography (Petroleum ether/ Ethyl acetate = 30:1) as pale yellow oil. <sup>1</sup>H NMR (400 MHz, CDCl<sub>3</sub>) δ 8.07 (d, *J* = 8.0 Hz, 2H), 7.59 (t, *J* = 7.4 Hz, 1H), 7.46 (t, *J* = 7.6 Hz, 2H), 7.36 – 7.31 (m, 1H), 7.29 – 7.27 (m, 1H), 7.24 – 7.20 (m, 2H), 4.66 (d, *J* = 17.2 Hz, 1H), 4.19 (d, *J* = 17.2 Hz, 1H), 3.62 – 3.50 (m, 1H), 3.44 – 3.35 (m, 1H), 2.78 – 2.65 (m, 2H), 2.40 – 2.30 (m, 1H), 1.39 (s, 9H). <sup>19</sup>F NMR (376 MHz, CDCl<sub>3</sub>) δ -107.77 (d, *J* = 20.3 Hz, 1F), -108.55 (d, *J* = 20.3 Hz, 1F). <sup>13</sup>C NMR (101 MHz, CDCl<sub>3</sub>) δ 189.9 (dd, *J* = 33.2, 28.4 Hz), 169.5 (d, *J* = 12.3 Hz), 167.6, 141.3, 135.7, 133.8, 132.6, 130.1 (d, *J* = 5.0 Hz), 129.4, 128.4, 127.9, 126.9, 122.5, 118.2 (dd, *J* = 268.8, 247.8 Hz), 82.0, 50.6, 45.6 (dd, *J* = 25.7, 19.9 Hz), 28.5, 27.9, 23.8. MS



(ESI): m/z (%) 452 ([M+Na]<sup>+</sup>, 100). HRMS (ESI): calculated for C<sub>24</sub>H<sub>25</sub>F<sub>2</sub>NO<sub>4</sub>Na ([M+Na]<sup>+</sup>): 452.1752; Found: 452.1645.

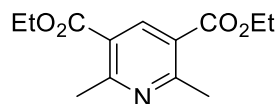

**Diethyl 2,6-dimethylpyridine-3,5-dicarboxylate (6).** This compound is known<sup>[9]</sup>. The product was purified with silica gel chromatography (Petroleum ether/ Ethyl acetate = 10:1) as white solid. <sup>1</sup>H NMR (400 MHz, CDCl<sub>3</sub>) δ 8.67 (s, 1 H), 4.38 (q, J = 6.8 Hz, 4 H), 2.84 (s, 6 H), 1.40 (t, J = 6.8 Hz, 6 H); <sup>13</sup>C NMR (101 MHz, CDCl<sub>3</sub>) δ 165.7, 162.1, 141.3, 123.3, 61.5, 24.6, 14.3.

## 7. References.

- [1] Y. Xu, Z. J. Xu, Z. P. Liu, Z. P. Liu and H. Lou, *Org. Chem. Front.*, 2019, **6**, 3902.
- [2] Y. Huang, J. Jia, Q.-P. Huang, L. Zhao, P. Wang, J. W. Gu and C.-Y. He, *Chem. Commun.*, 2020, **56**, 14247.
- [3] F. J. R. Klauck, M. J. James and F. Glorius, *Angew. Chem., Int. Ed.*, 2017, **56**, 12336.
- [4] F. J. Klauck, H. Yoon, M. J. James, M. Lautens and F. Glorius, *ACS Catal.*, 2018, **9**, 236.
- [5] I. Kim, H. Im, H. Lee and S. Hong, *Chem. Sci.*, 2020, **11**, 3192.
- [6] X. Jiang, M. M. Zhang, W. Xiong, L. Q. Lu and W. J. Xiao, *Angew. Chem., Int. Ed.*, 2019, **58**, 2402.
- [7] M. E. Hoerrner, K. M. Baker, C. H. Basch, E. M. Bampo and M. P. Watson, *Org. Lett.*, 2019, **21**, 7356.
- [8] F. M. Liao, Z. Y. Cao, J. S. Yu and J. Zhou, *Angew. Chem. Int. Ed.*, 2017, **129**, 2499.
- [9] D. Yu, W.-P. To, G. S. M. Tong, L.-L. Wu, K.-T. Chan, L. Du, D. L. Phillips, Y. Liu, and C.-M. Che, *Chem. Sci.*, 2020, **11**, 6370.

## 8. Copies of NMR spectra of 1, 3, 5, 6.

### 2,4,6-triphenyl-1-(thiophen-2-ylmethyl)pyridin-1-ium tetrafluoroborate (1m).

7.852  
7.835  
7.725  
7.707  
7.668  
7.651  
7.517  
7.495  
7.484  
7.467  
7.260  
7.068  
7.061  
6.394  
6.259  
6.249  
— 5.712  
2.029  
1.851  
1.247  
— -0.011

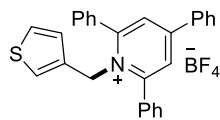

**Compound 1m**

<sup>1</sup>H NMR (400 MHz, CDCl<sub>3</sub>)

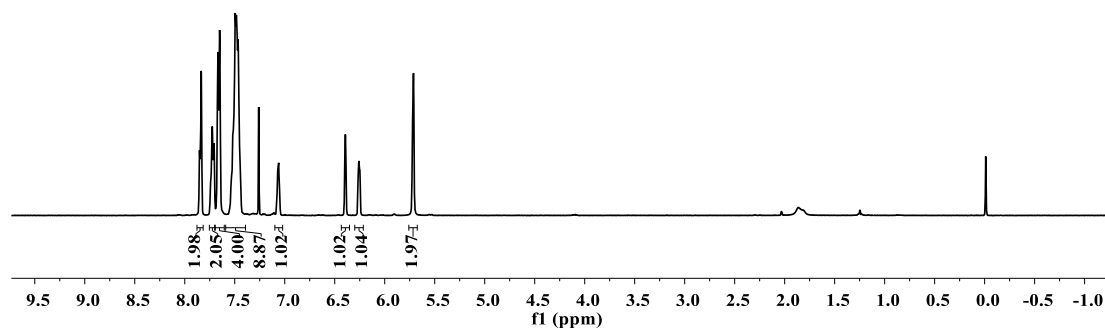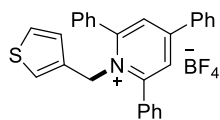

**Compound 1m**

<sup>19</sup>F NMR (376 MHz, CDCl<sub>3</sub>)

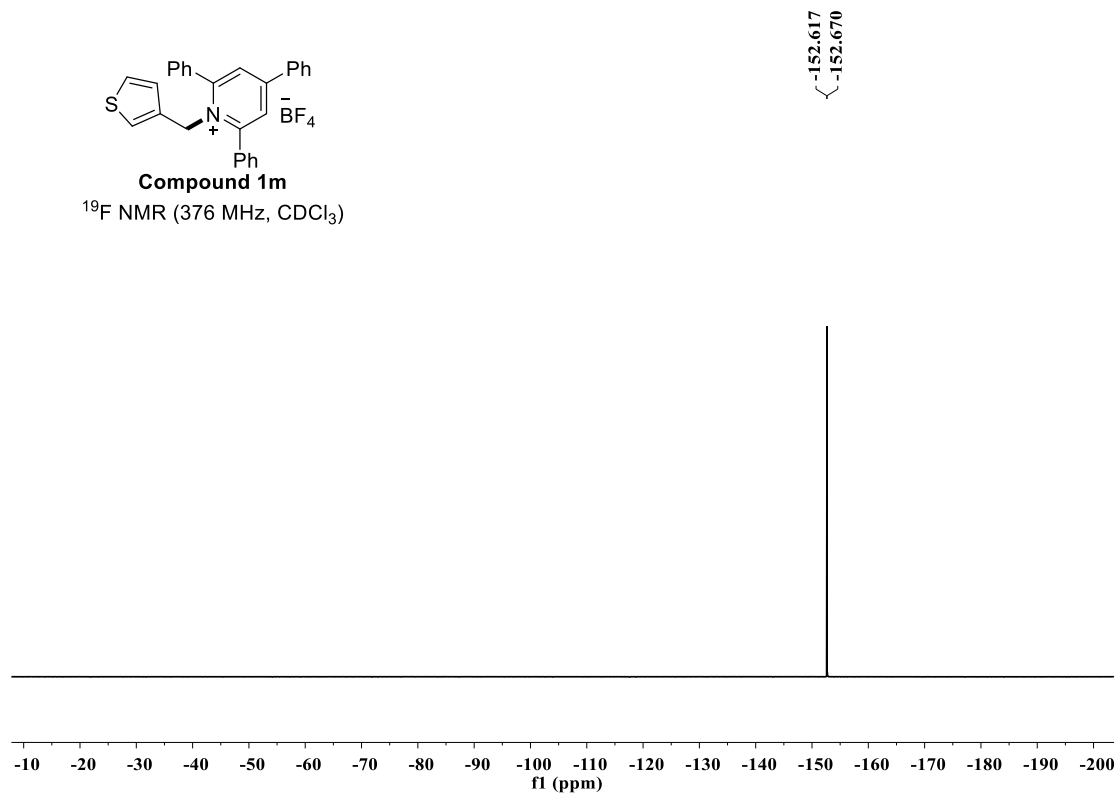

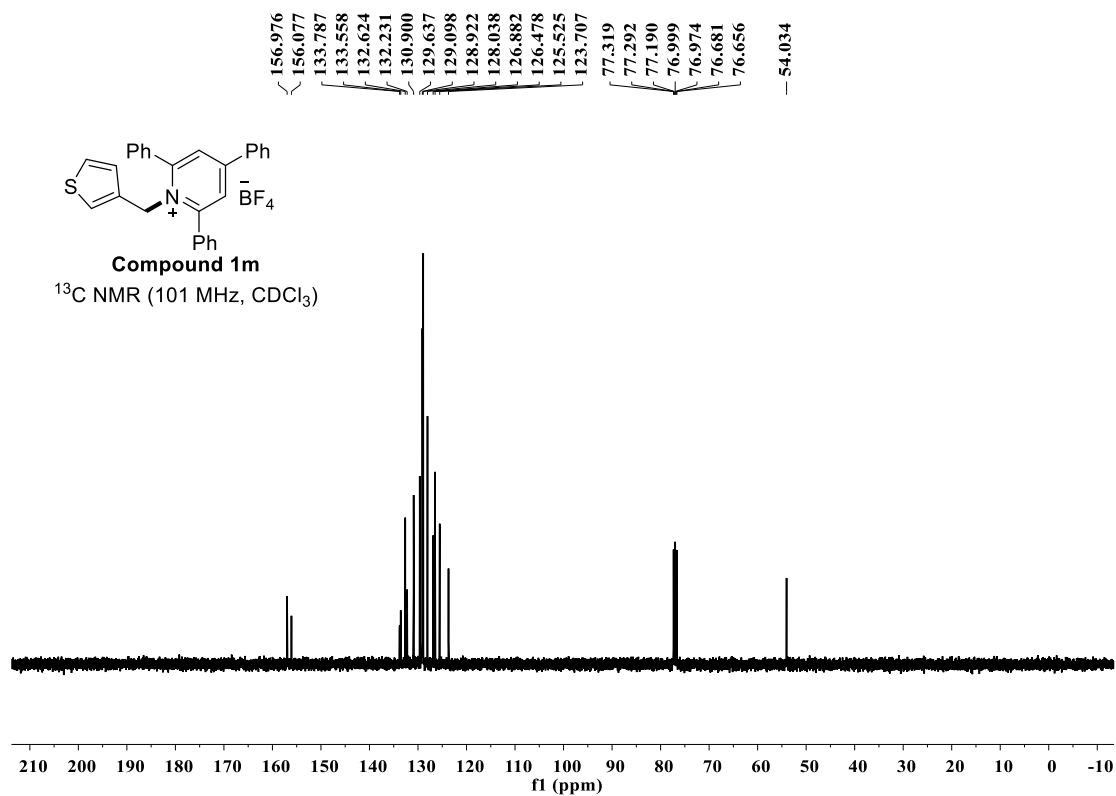

**1-(4-methoxy-4-oxobutan-2-yl)-2,4,6-triphenylpyridin-1-ium tetrafluoroborate (1x).**

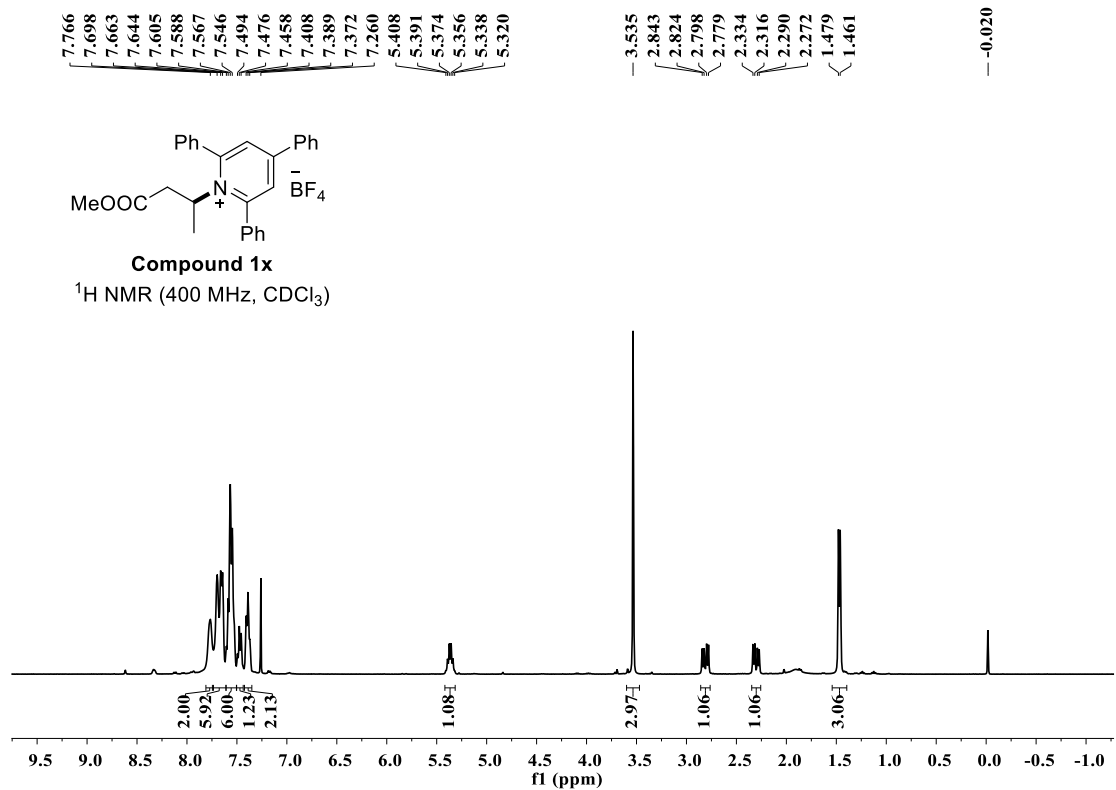

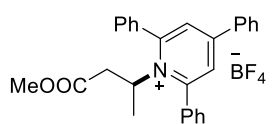

**Compound 1x**

<sup>19</sup>F NMR (376 MHz, CDCl<sub>3</sub>)

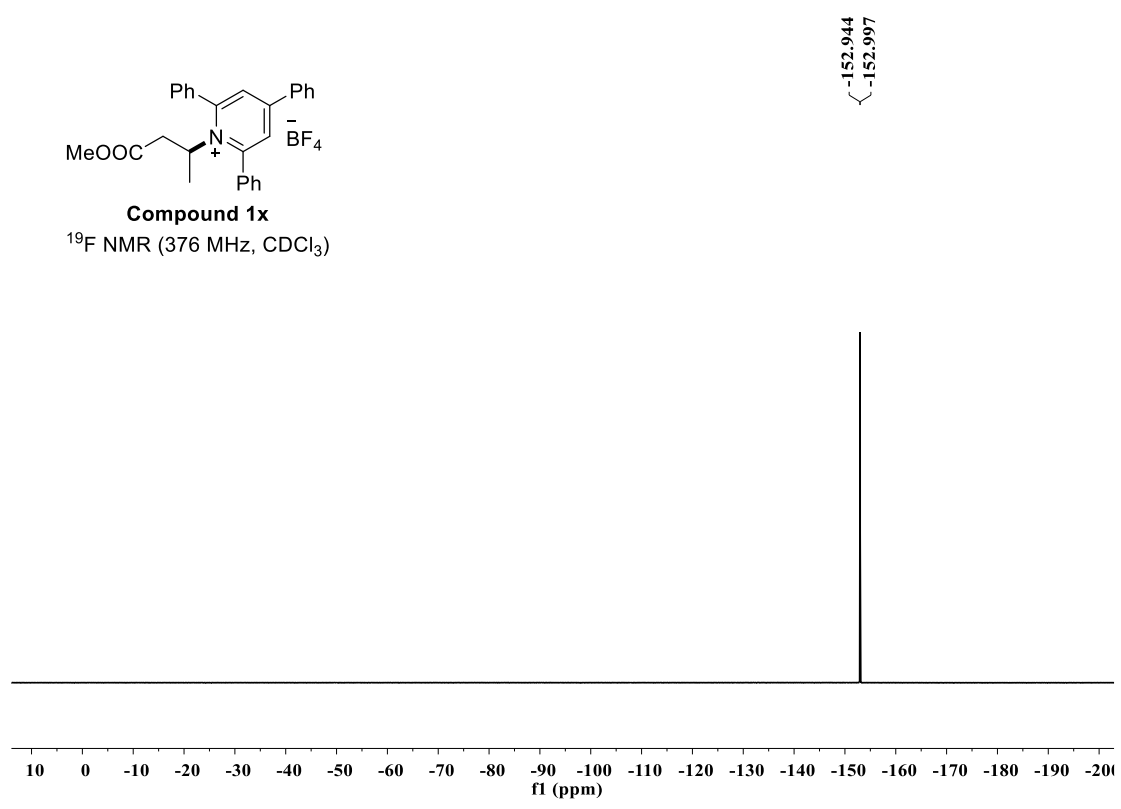

- 169.738
- 155.149
- 133.679
- 133.400
- 131.864
- 130.938
- 129.408
- 129.139
- 129.059
- 129.022
- 128.968
- 128.891
- 128.830
- 128.749
- 128.677
- 128.645
- 128.137
- 77.318
- 77.201
- 76.999
- 76.681
- 61.615
- 52.081
- 39.533
- 22.009

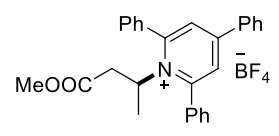

**Compound 1x**

<sup>13</sup>C NMR (101 MHz, CDCl<sub>3</sub>)

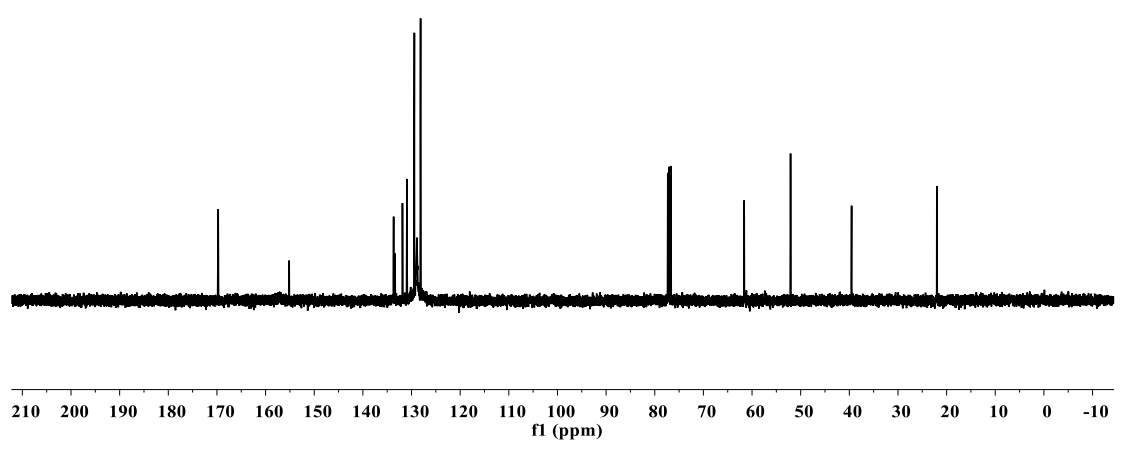

### 2,2-difluoro-3-(4-iodophenyl)-1-phenylpropan-1-one (3a.)

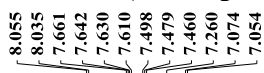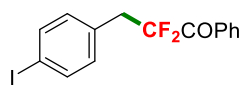

Compound 3a

$^1\text{H}$  NMR (400 MHz,  $\text{CDCl}_3$ )

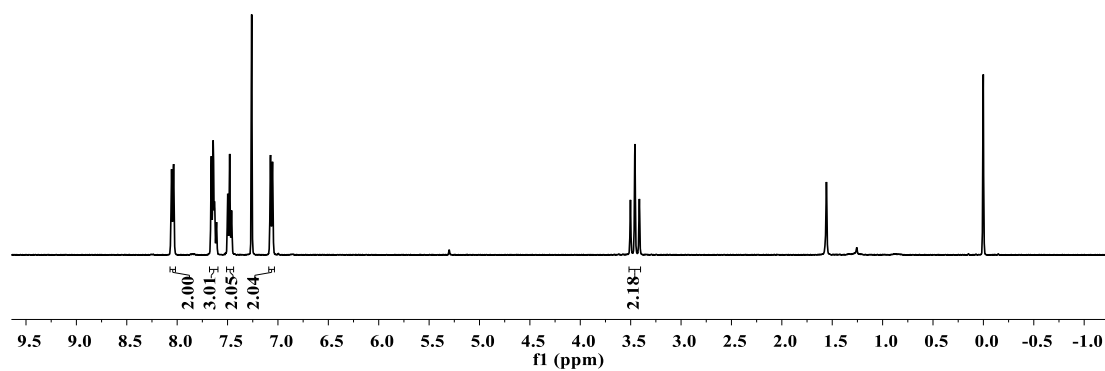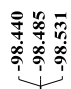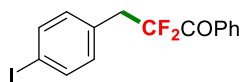

Compound 3a

$^{19}\text{F}$  NMR (376 MHz,  $\text{CDCl}_3$ )

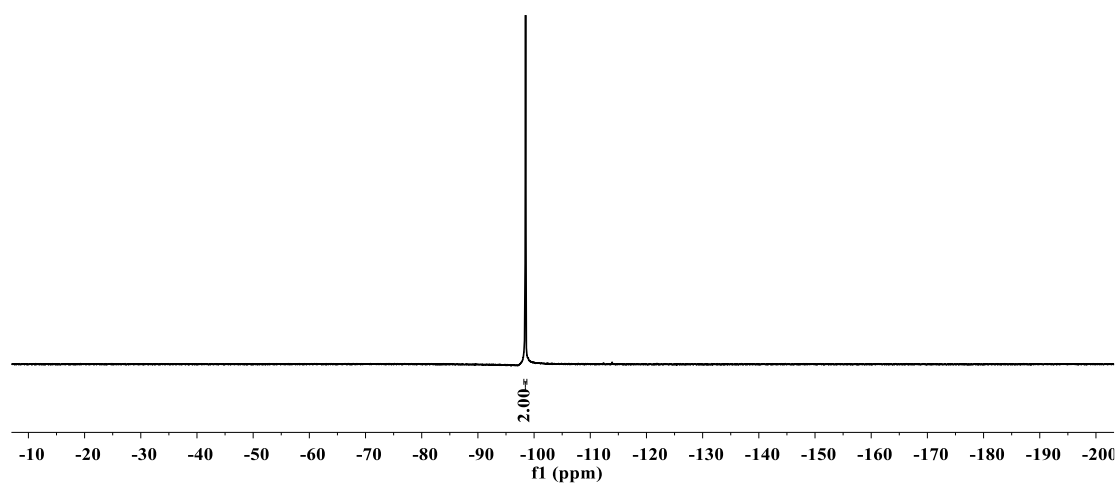

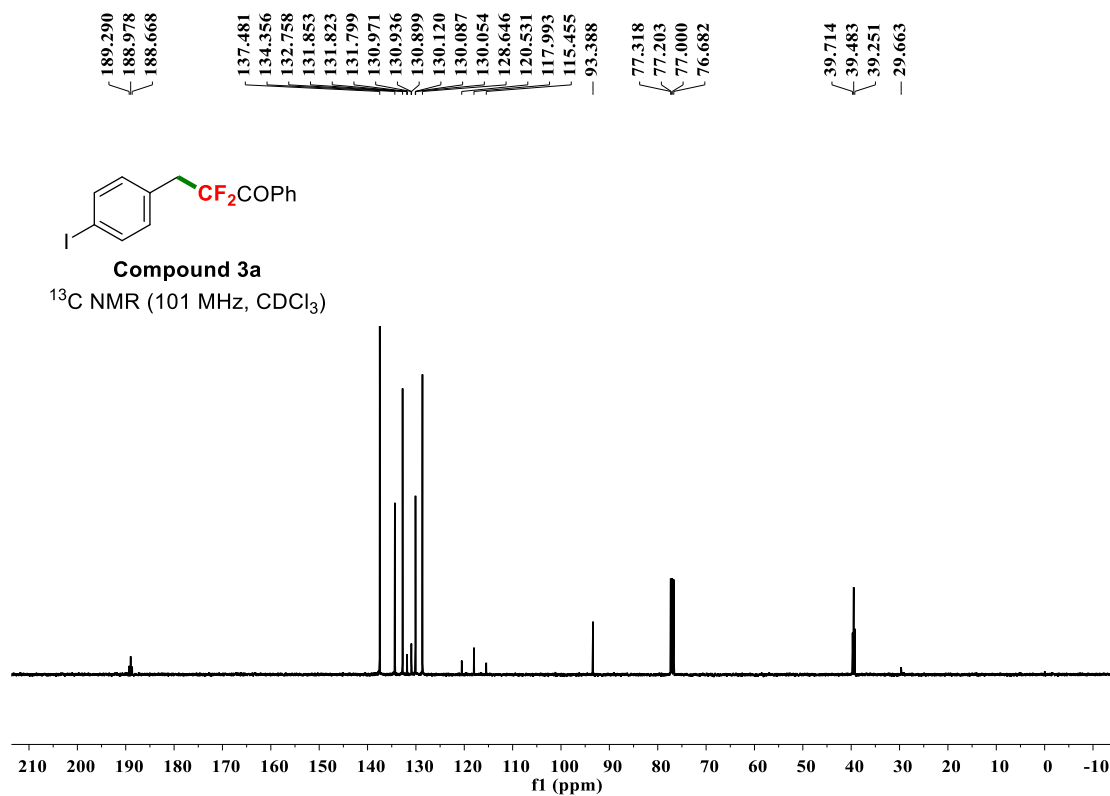

**3-(4-Chlorophenyl)-2,2-difluoro-1-phenylpropan-1-one (3b).**

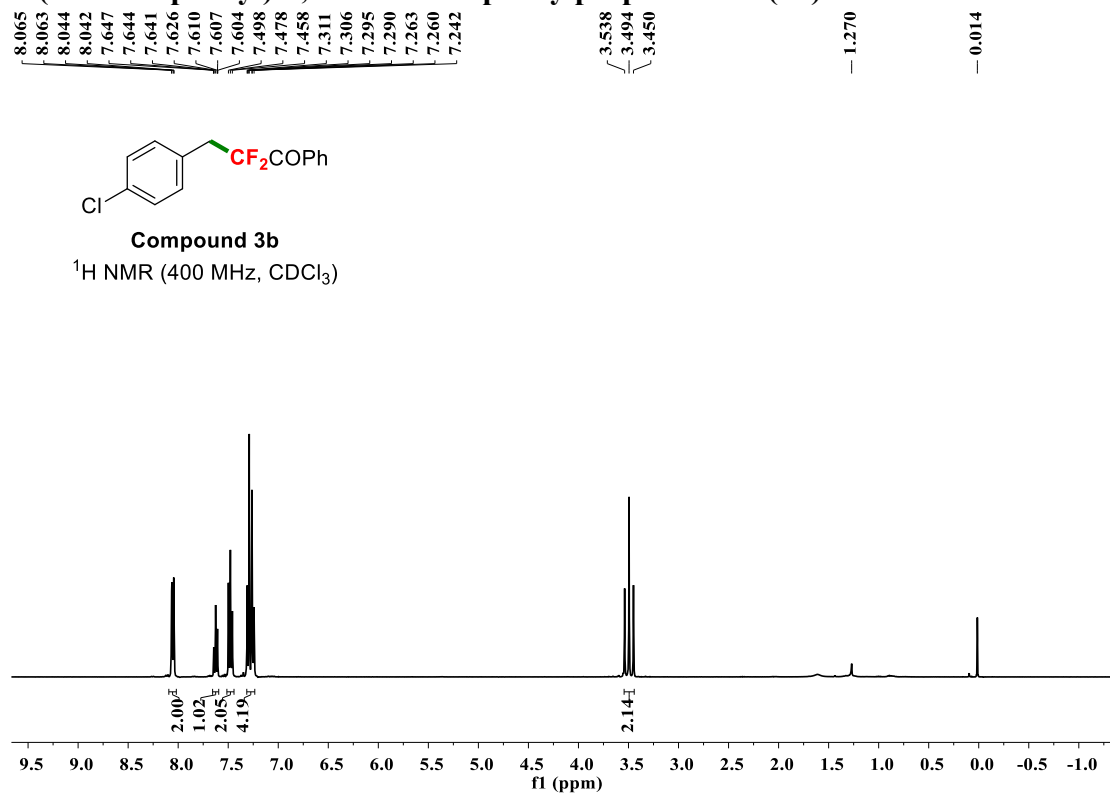

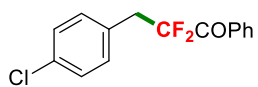

**Compound 3b**

$^{19}\text{F}$  NMR (376 MHz,  $\text{CDCl}_3$ )

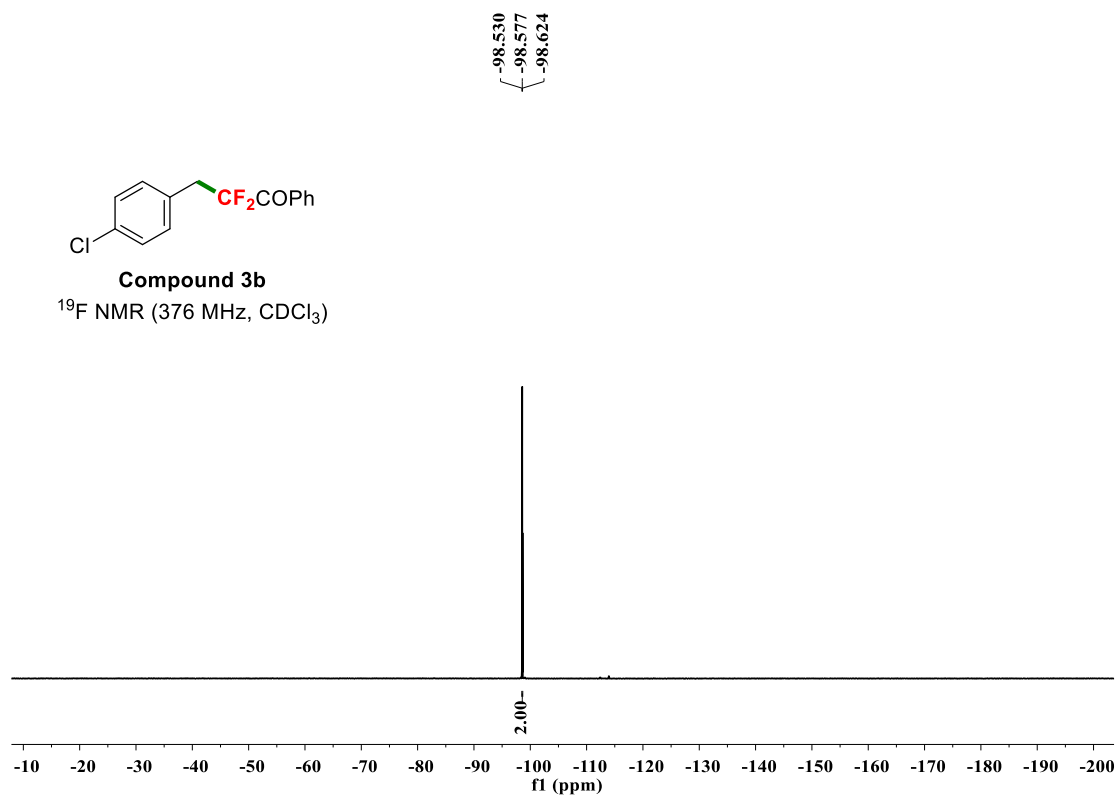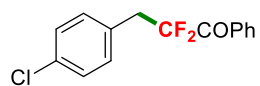

**Compound 3b**

$^{13}\text{C}$  NMR (101 MHz,  $\text{CDCl}_3$ )

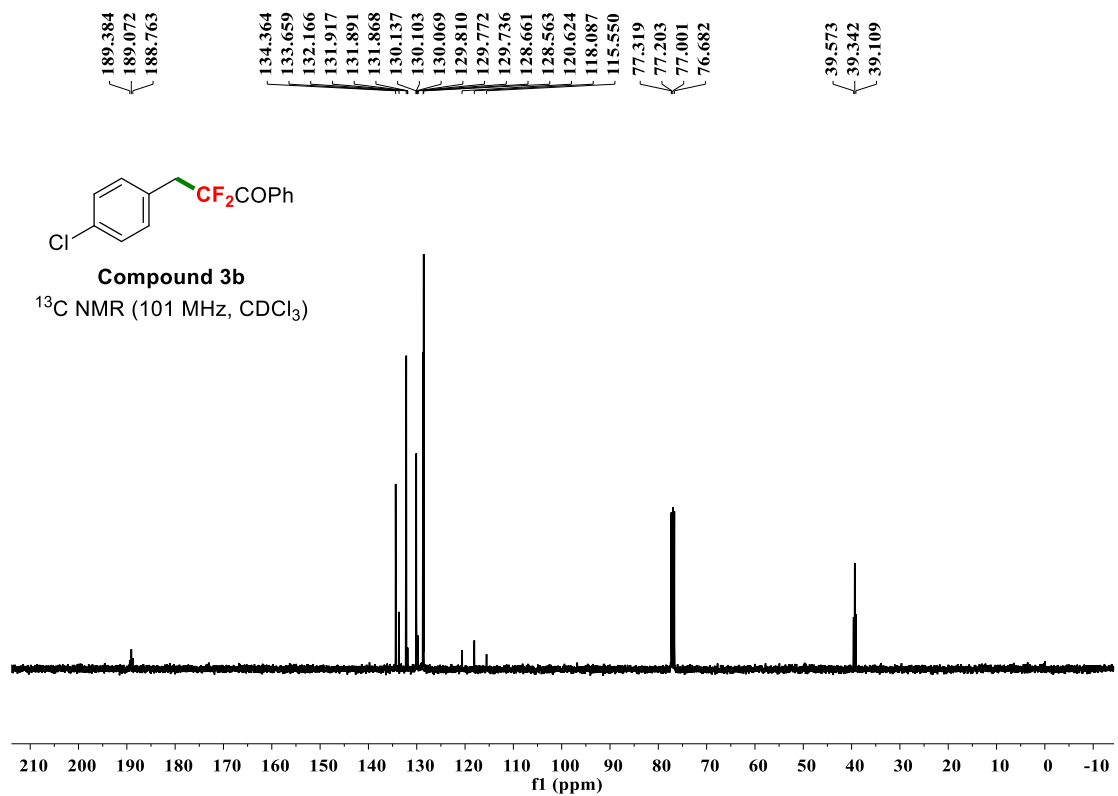

### 2,2-Difluoro-3-(4-fluorophenyl)-1-phenylpropan-1-one (3c).

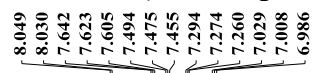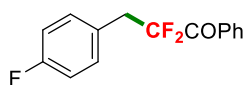

Compound 3c

<sup>1</sup>H NMR (400 MHz, CDCl<sub>3</sub>)

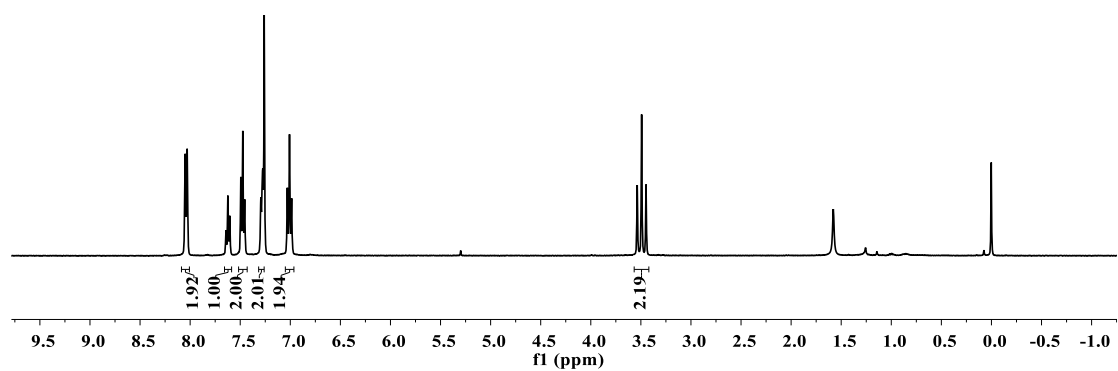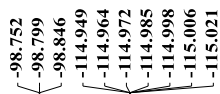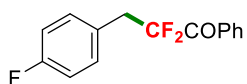

Compound 3c

<sup>19</sup>F NMR (376 MHz, CDCl<sub>3</sub>)

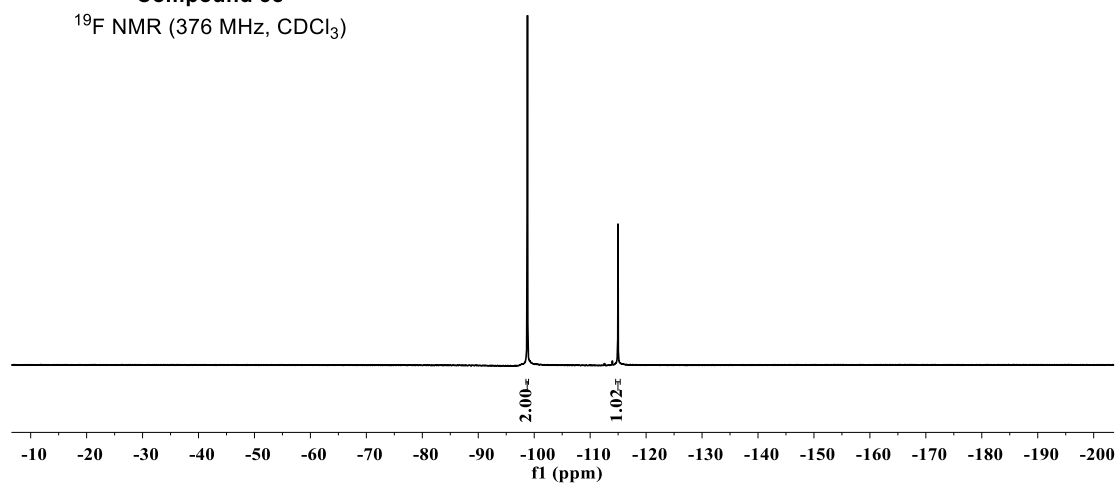



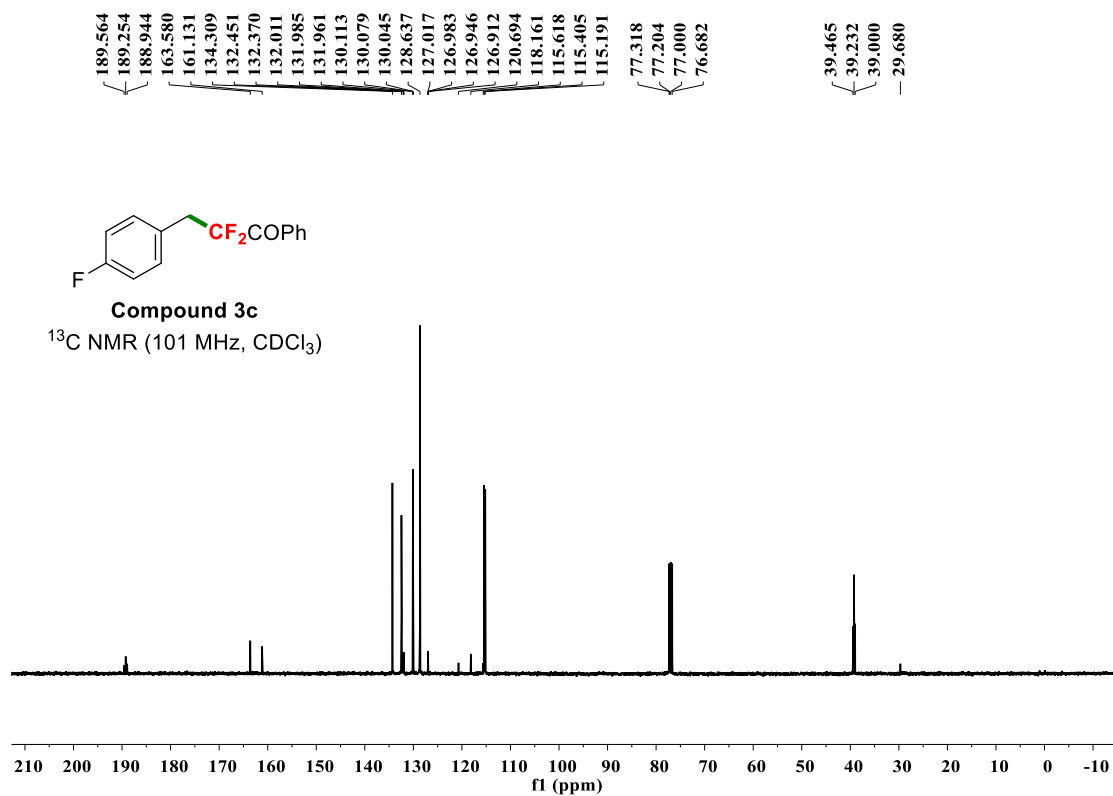

**4-(2,2-Difluoro-3-oxo-3-phenylpropyl)benzonitrile (3d).**

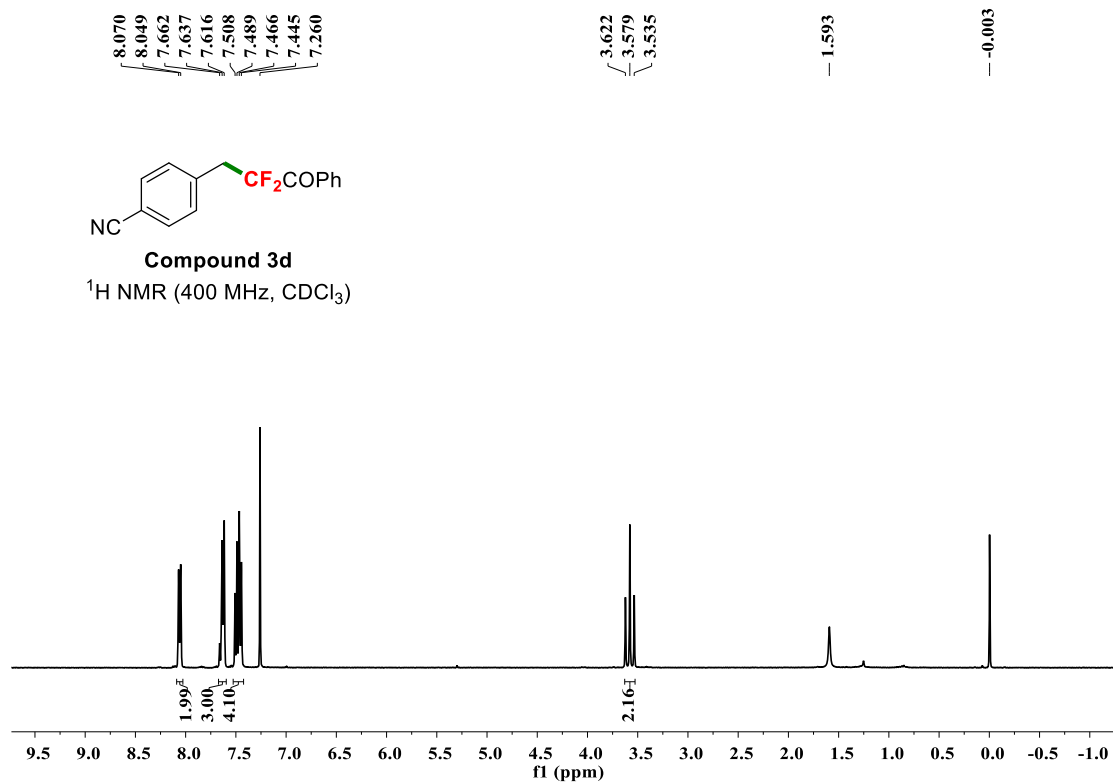

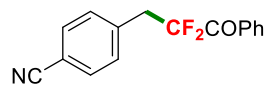

**Compound 3d**

$^{19}\text{F}$  NMR (376 MHz,  $\text{CDCl}_3$ )

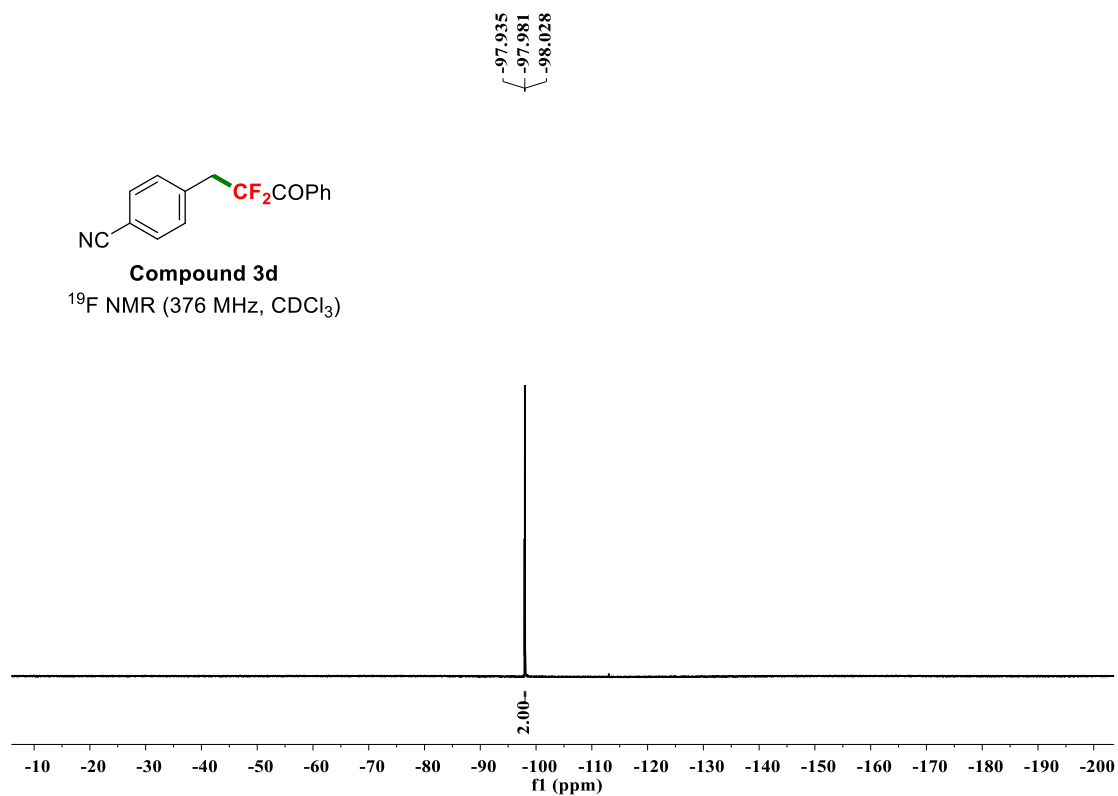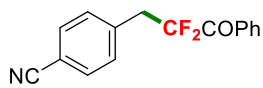

**Compound 3d**

$^{13}\text{C}$  NMR (101 MHz,  $\text{CDCl}_3$ )

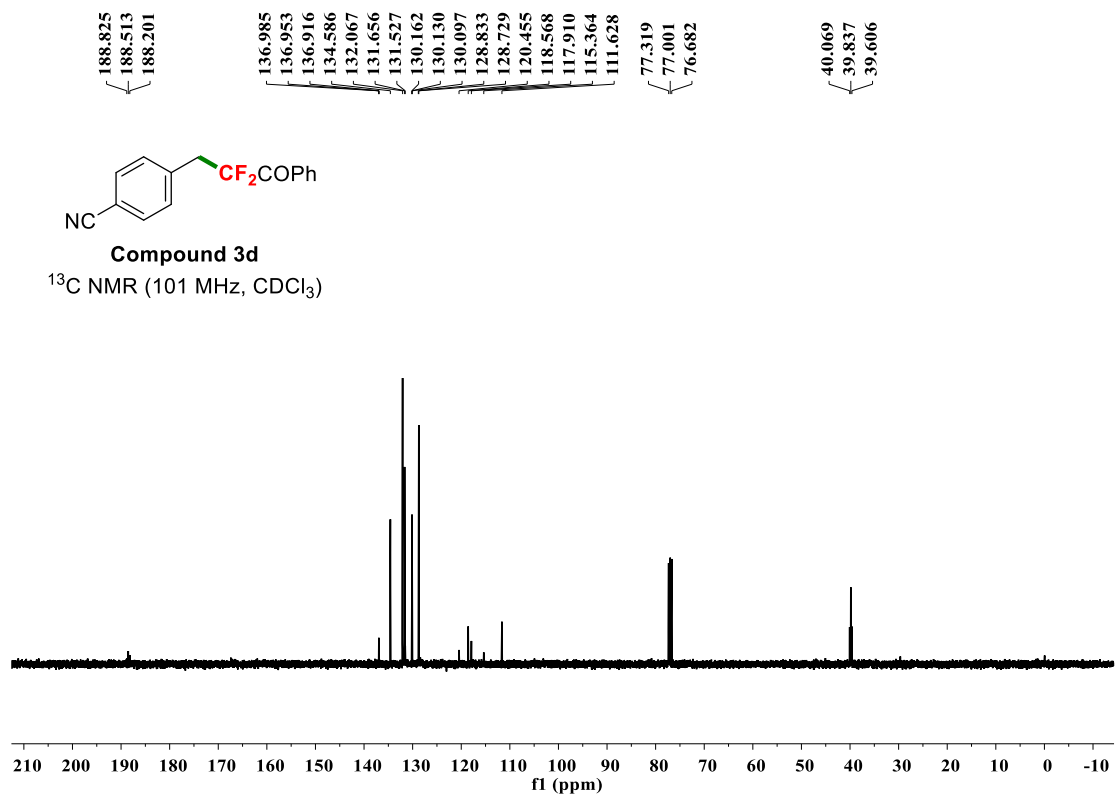

# Methyl 4-(2,2-difluoro-3-oxo-3-phenylpropyl)benzoate (3e).

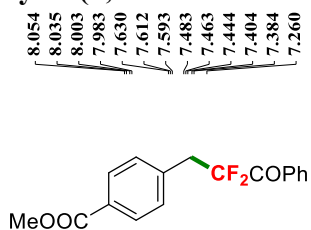

Compound 3e

<sup>1</sup>H NMR (400 MHz, CDCl<sub>3</sub>)

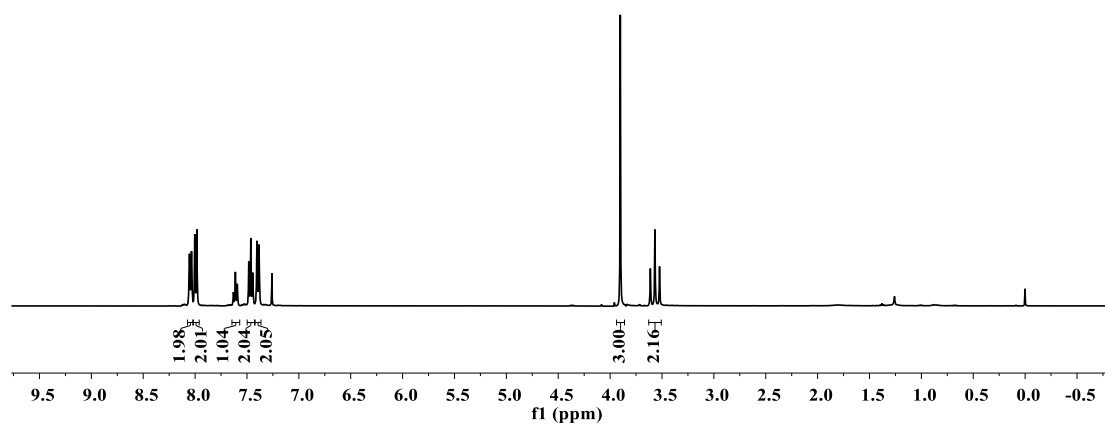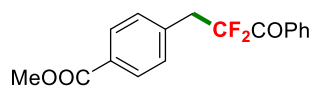

Compound 3e

<sup>19</sup>F NMR (376 MHz, CDCl<sub>3</sub>)

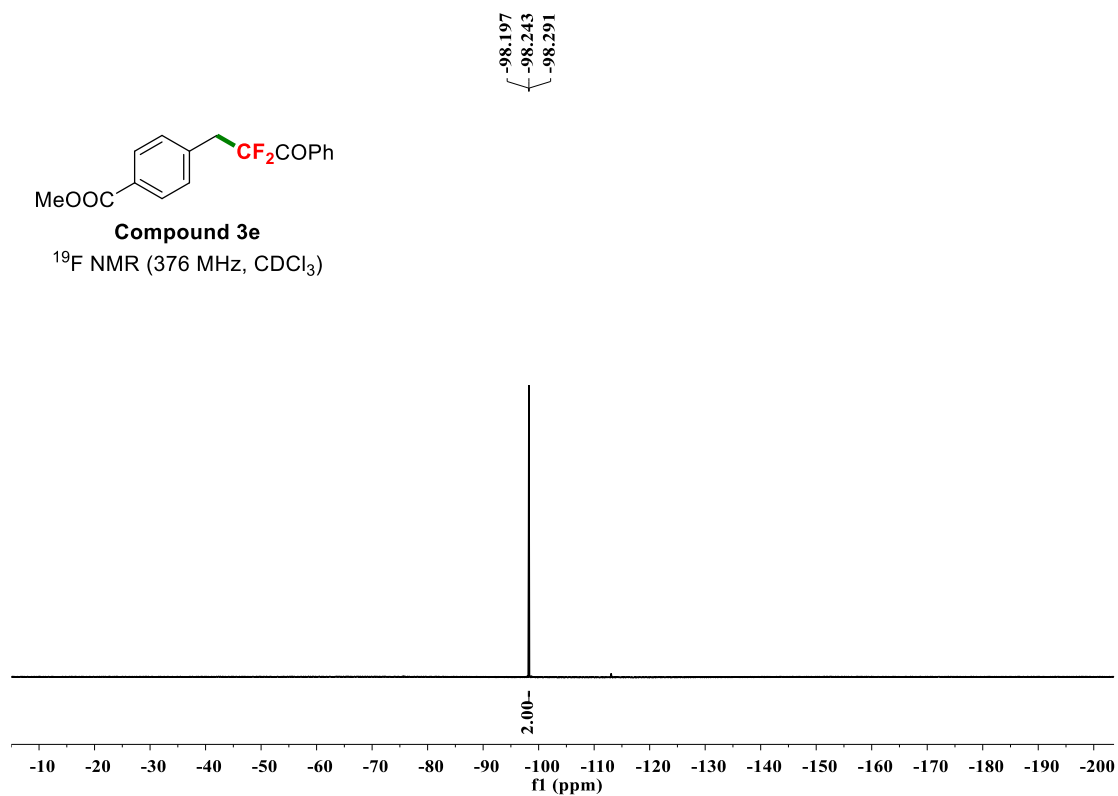

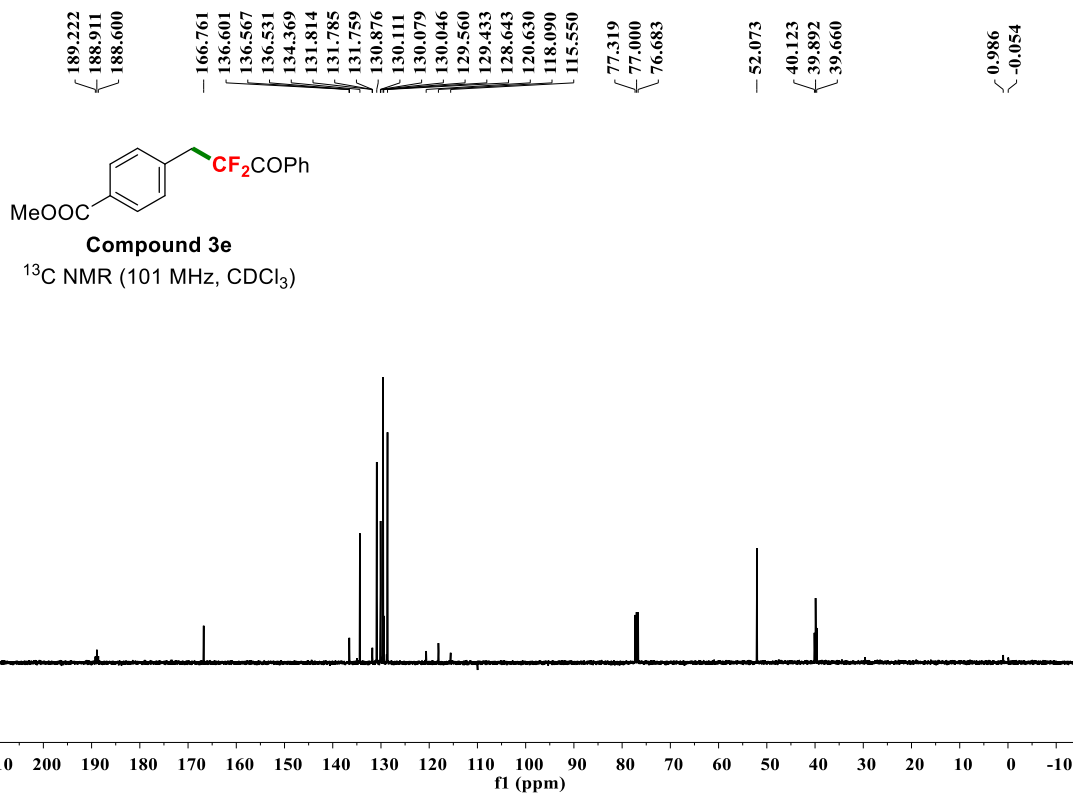

**2,2-Difluoro-1-phenyl-3-(p-tolyl)propan-1-one (3f).**

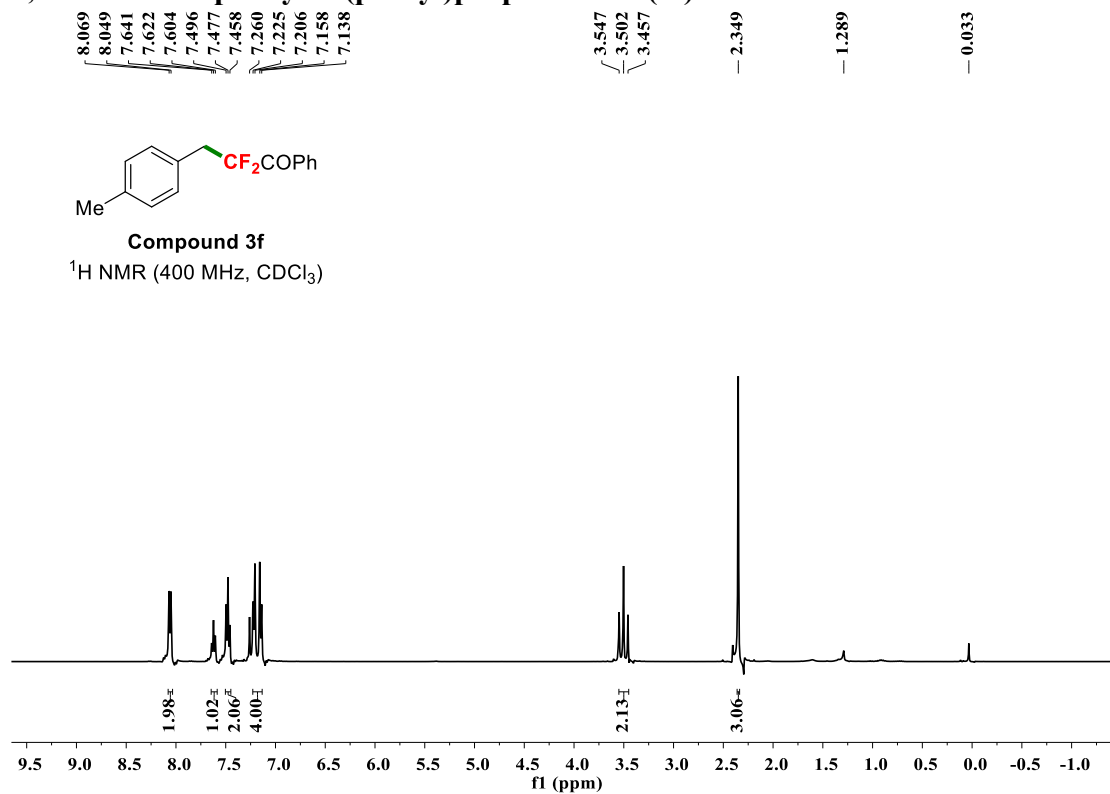

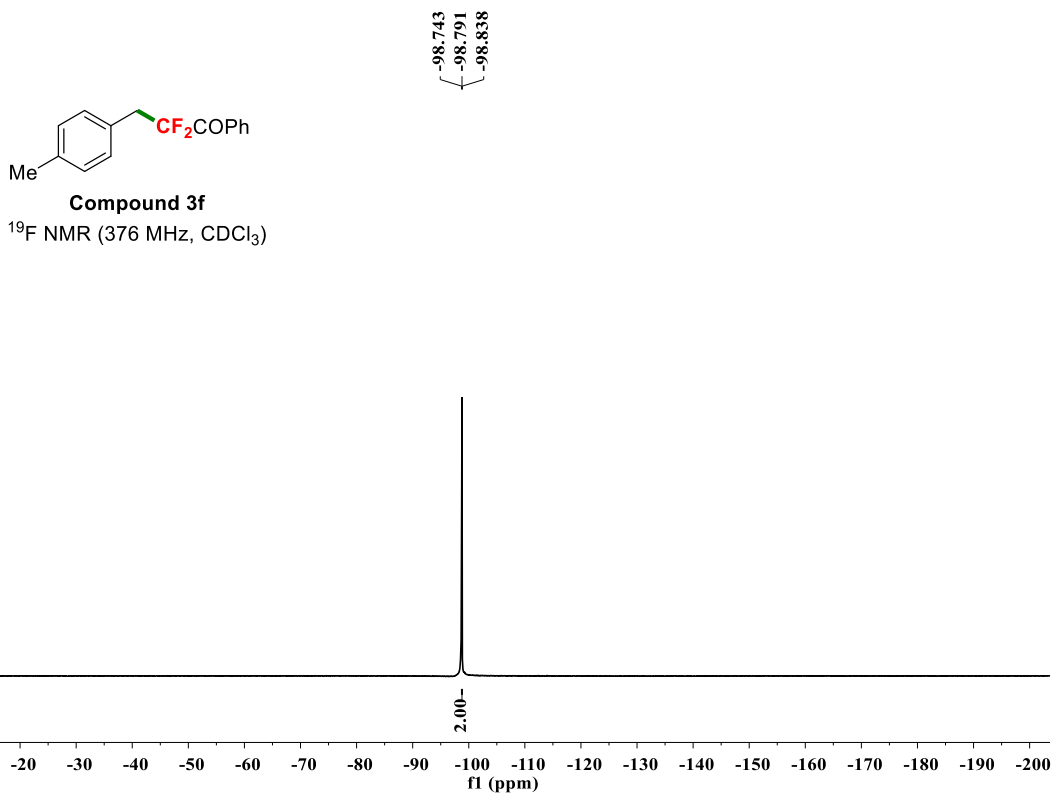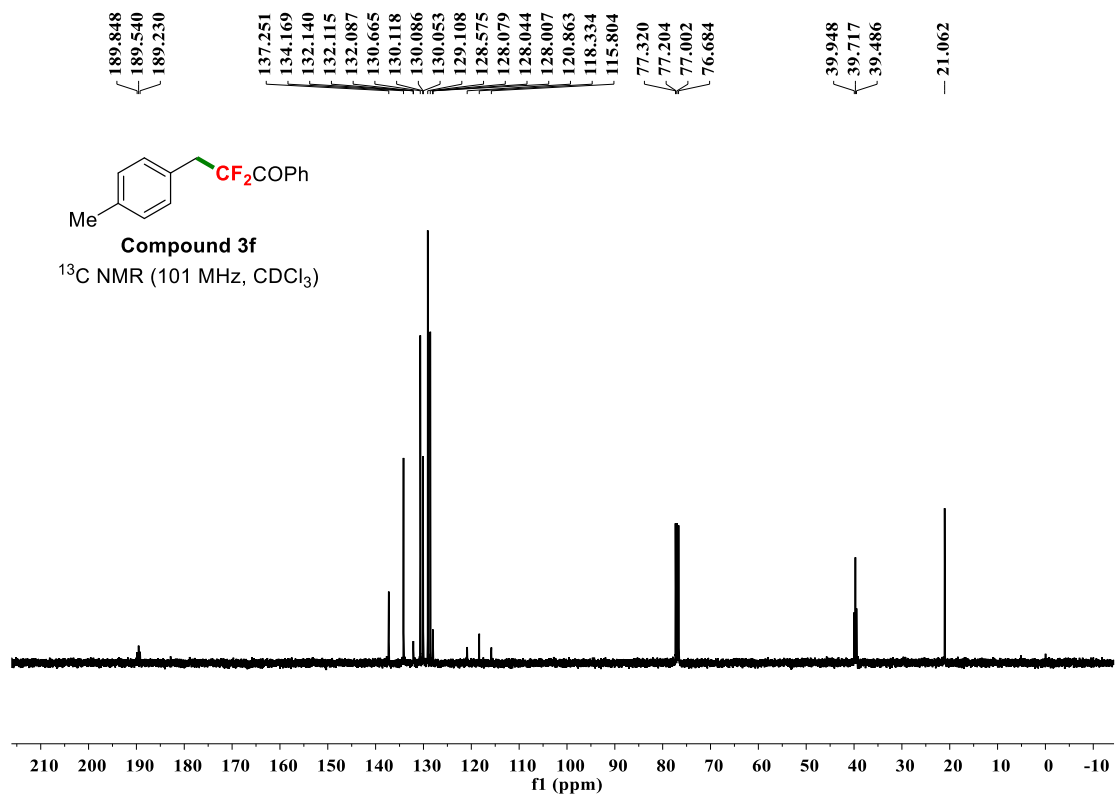

### 3-(2-Bromophenyl)-2,2-difluoro-1-phenylpropan-1-one (3g).

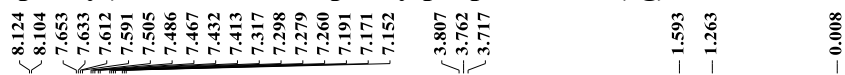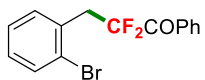

Compound 3g

<sup>1</sup>H NMR (400 MHz, CDCl<sub>3</sub>)

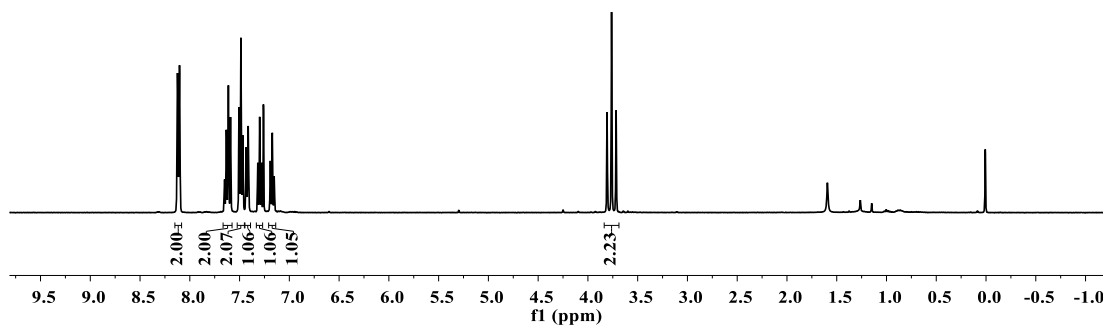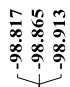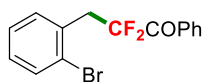

Compound 3g

<sup>19</sup>F NMR (376 MHz, CDCl<sub>3</sub>)

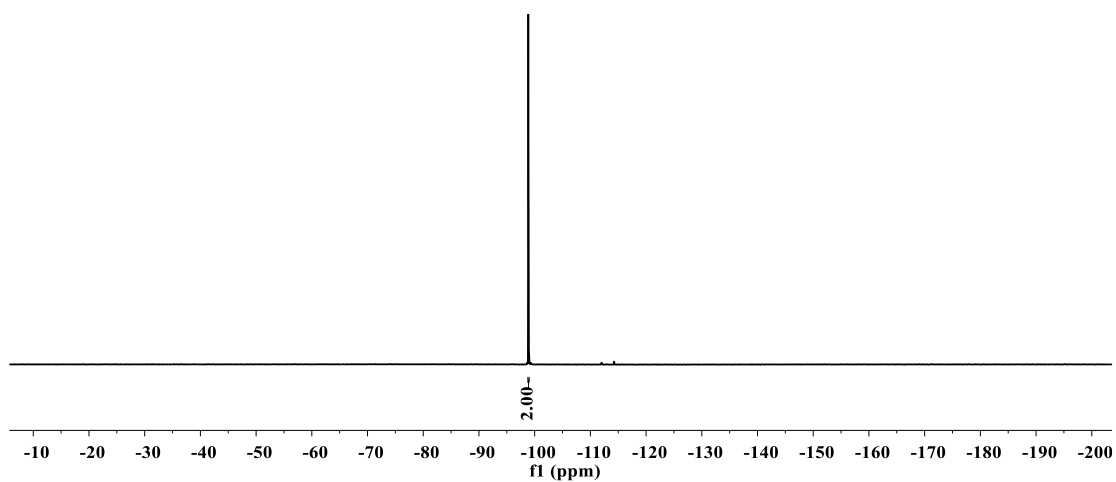

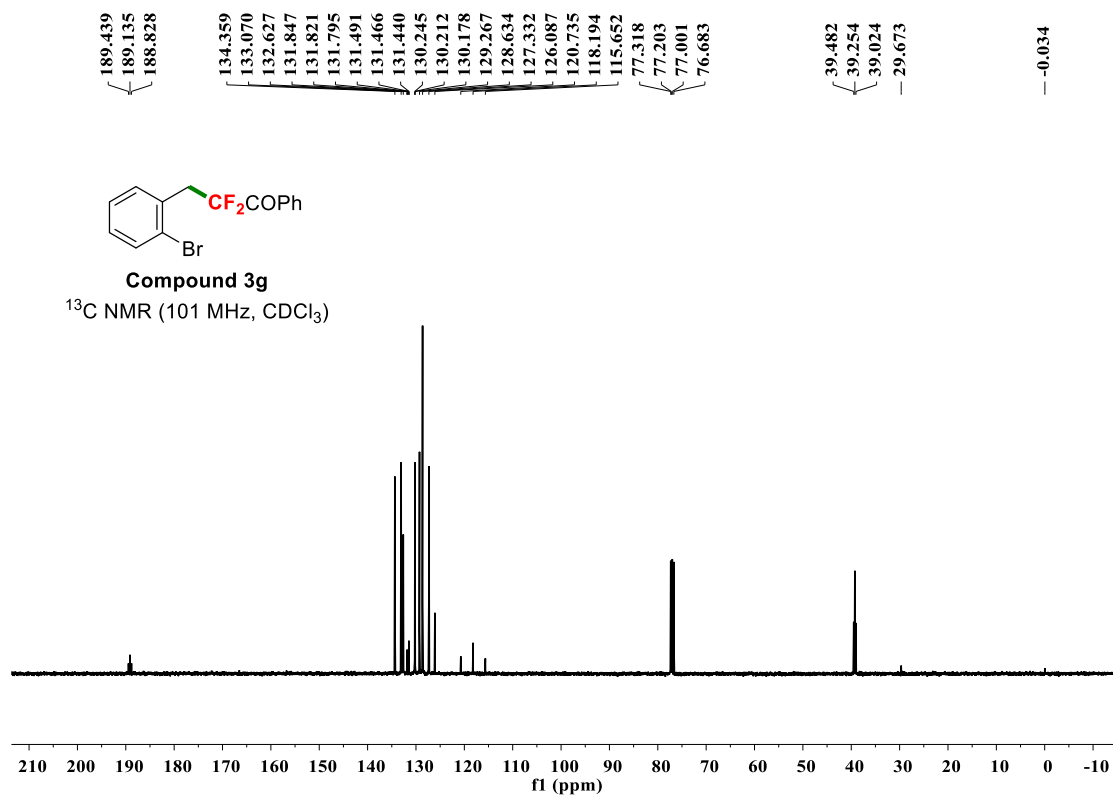

**2,2-difluoro-1-phenyl-3-(2-(trifluoromethyl)phenyl)propan-1-one (3h).**

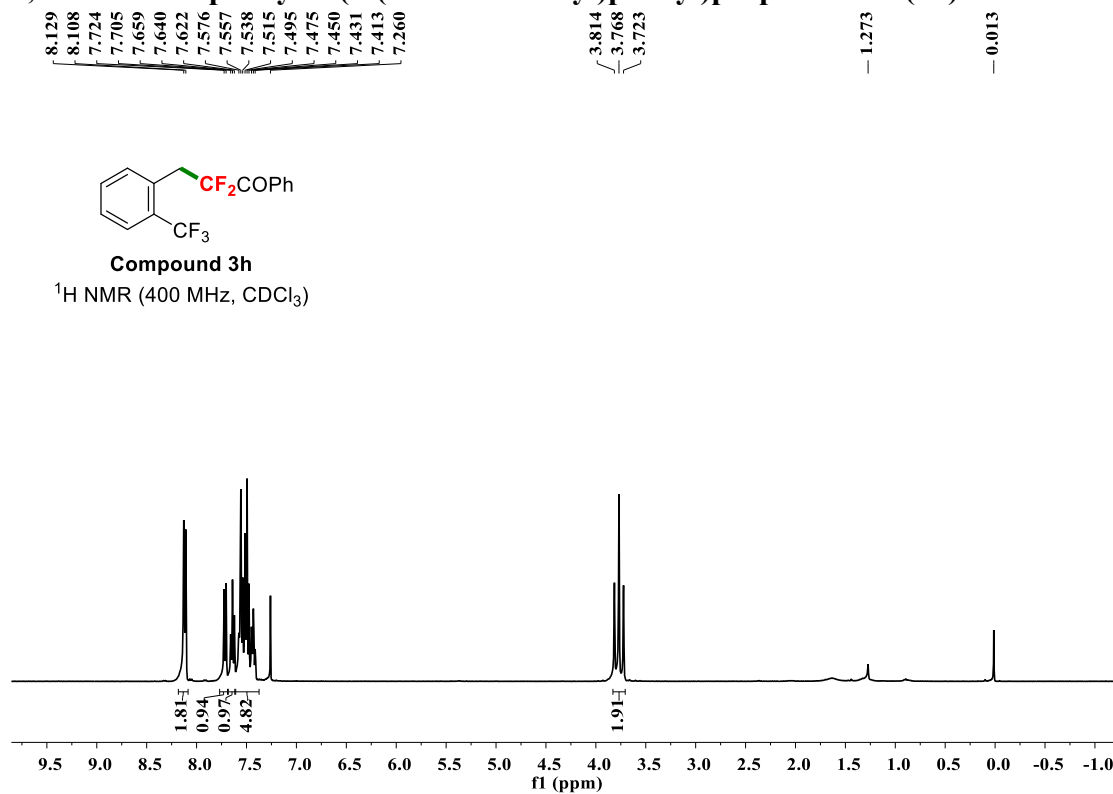

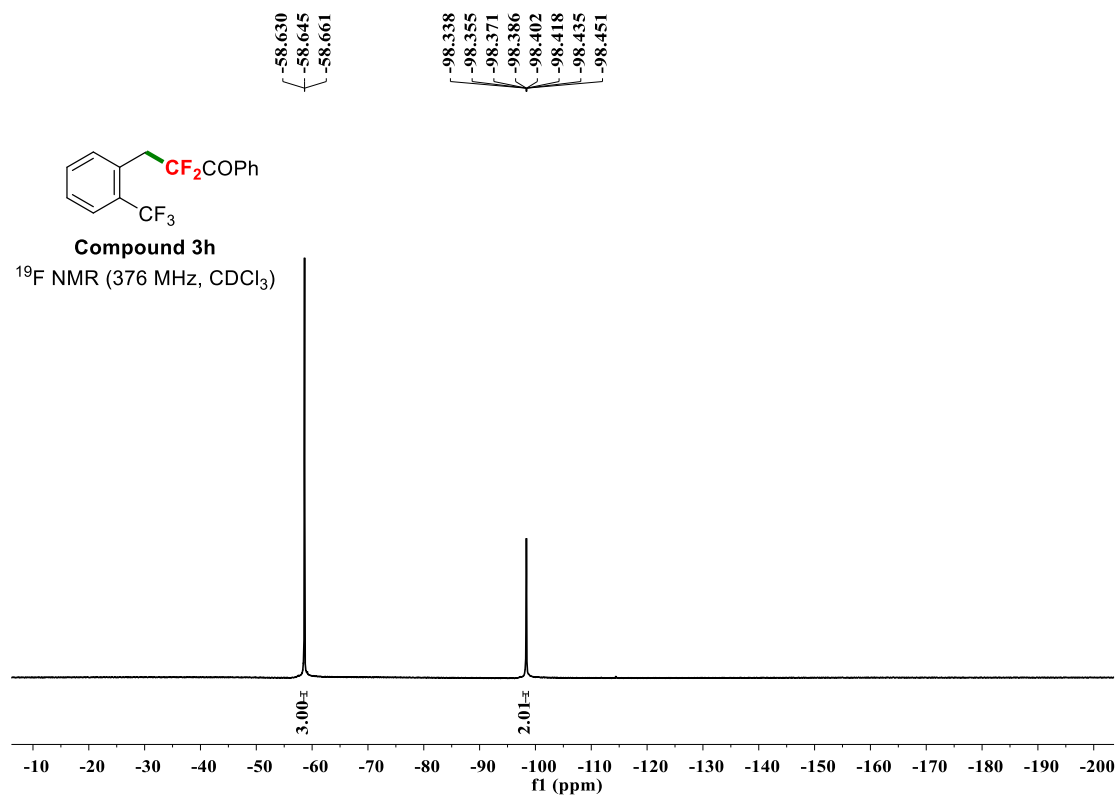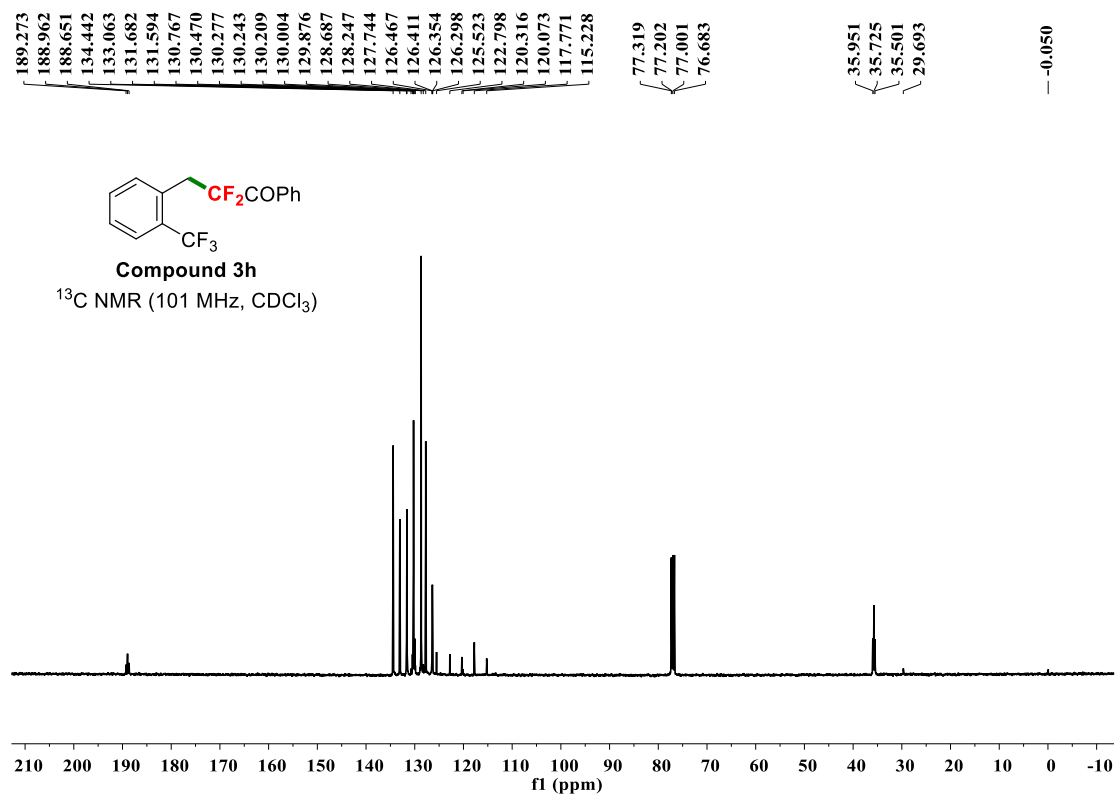



### 2,2-difluoro-1-phenyl-3-(o-tolyl)propan-1-one (3i).

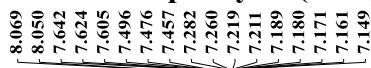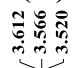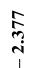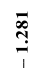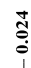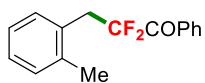

Compound 3i

<sup>1</sup>H NMR (400 MHz, CDCl<sub>3</sub>)

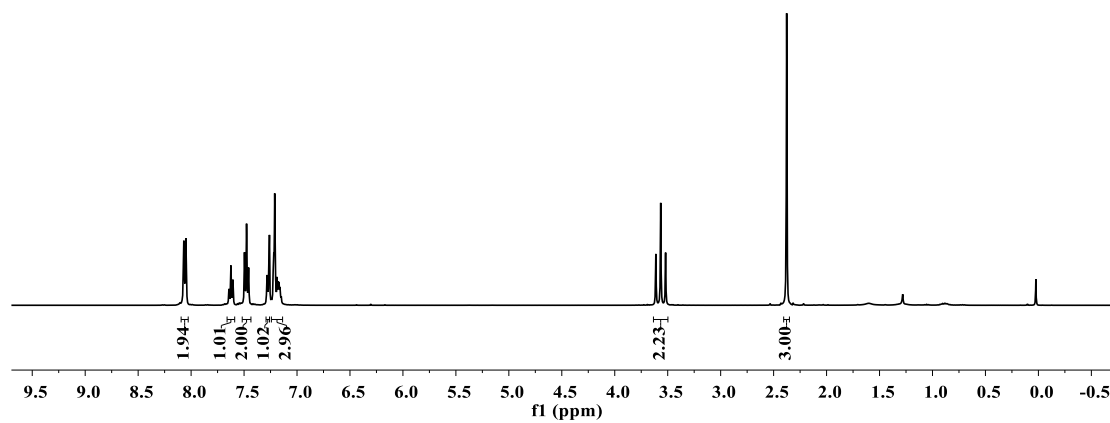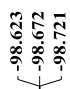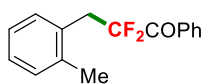

Compound 3i

<sup>19</sup>F NMR (376 MHz, CDCl<sub>3</sub>)

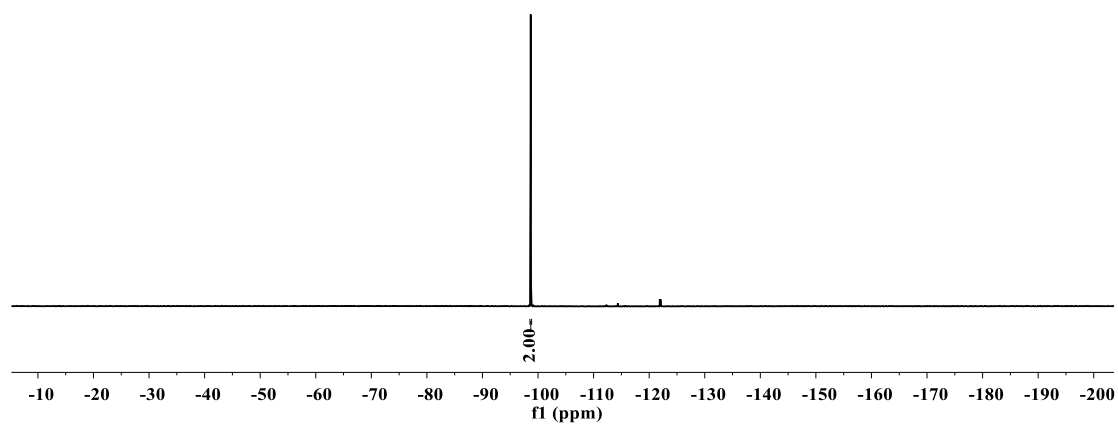

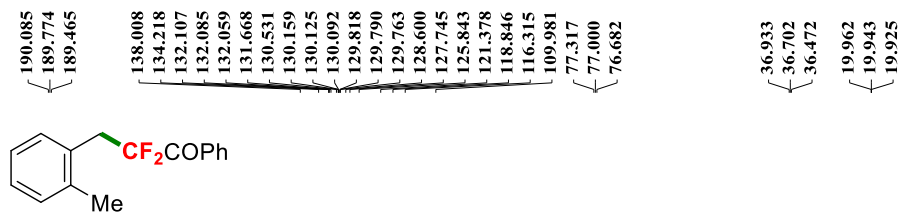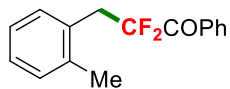

**Compound 3i**

<sup>13</sup>C NMR (400 MHz, CDCl<sub>3</sub>)

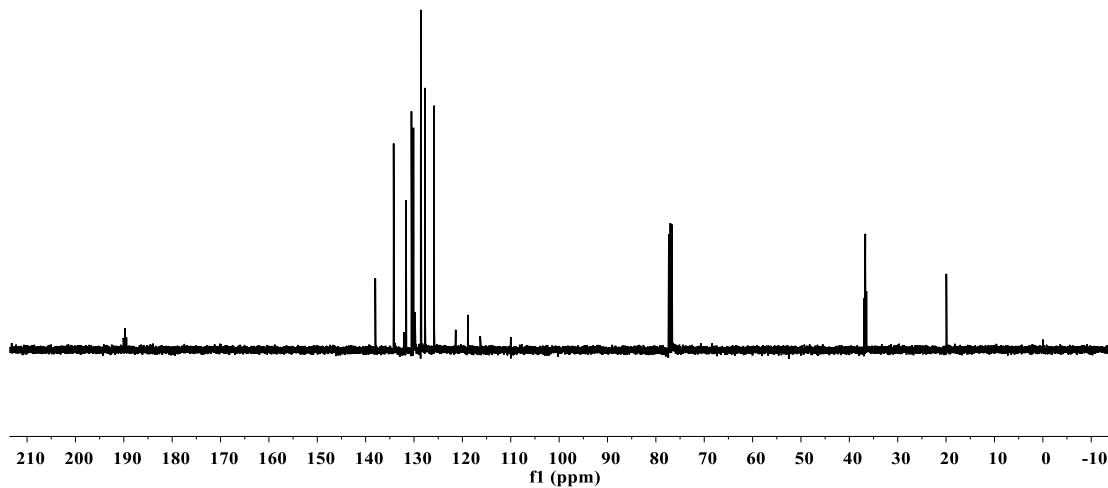

**2,2-difluoro-1-phenyl-3-(3-(trifluoromethyl)phenyl)propan-1-one (3j).**

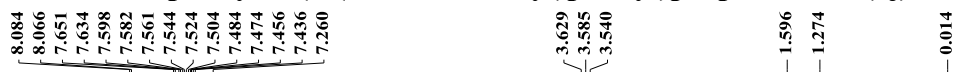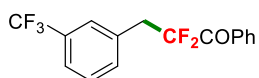

**Compound 3j**

<sup>1</sup>H NMR (400 MHz, CDCl<sub>3</sub>)

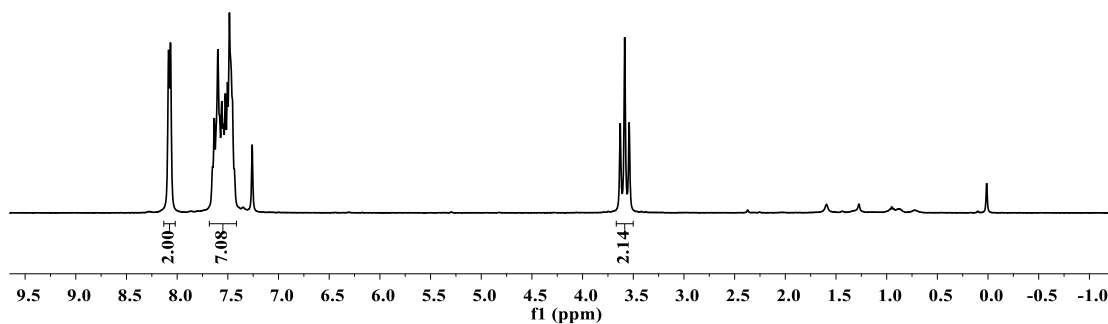

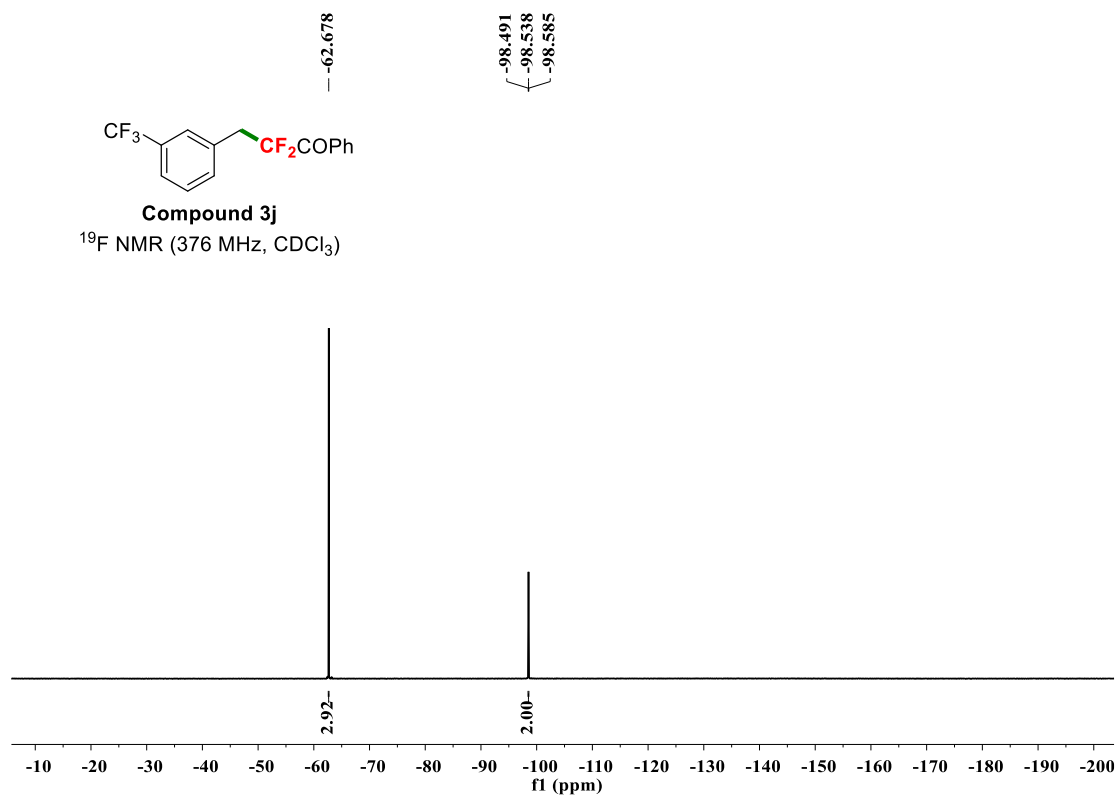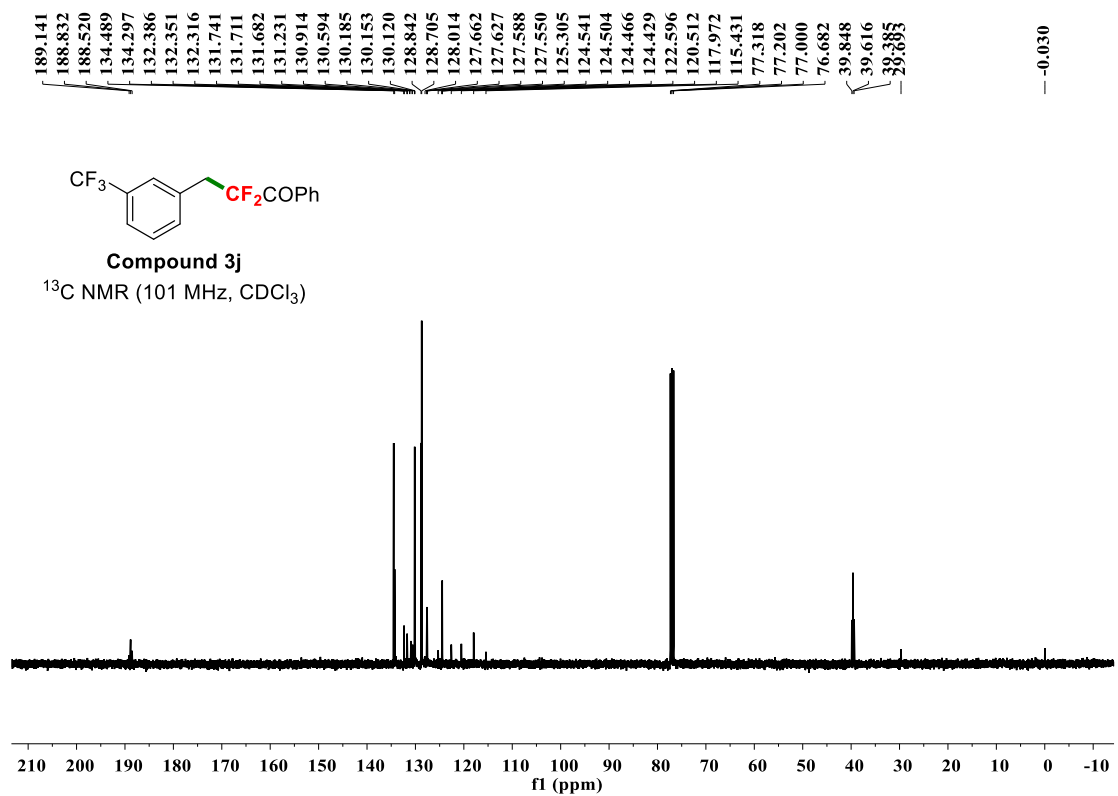

# 2,2-difluoro-1,3-diphenylpropan-1-one (3k).

8.059  
8.039  
7.636  
7.617  
7.598  
7.490  
7.471  
7.451  
7.326  
7.260

3.581  
3.536  
3.492

-0.025

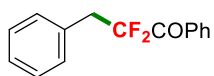

Compound 3k

<sup>1</sup>H NMR (400 MHz, CDCl<sub>3</sub>)

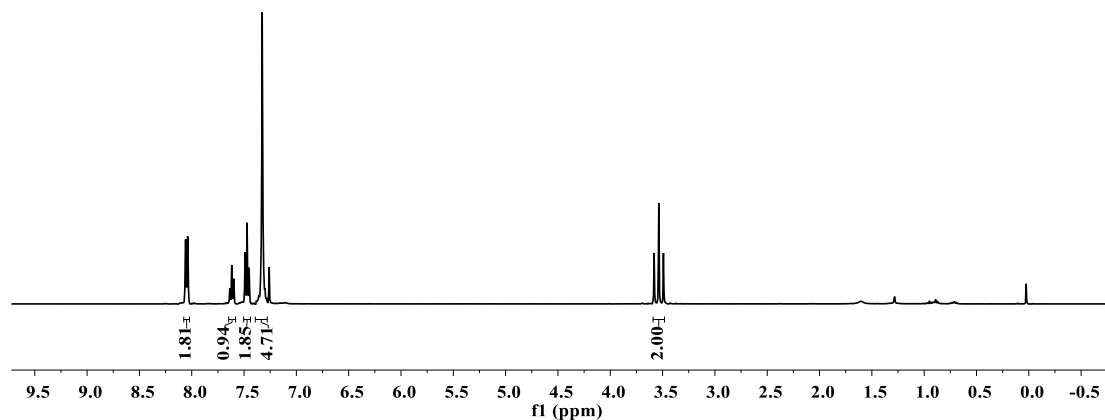

-98.633  
-98.681  
-98.728

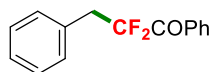

Compound 3k

<sup>19</sup>F NMR (376 MHz, CDCl<sub>3</sub>)

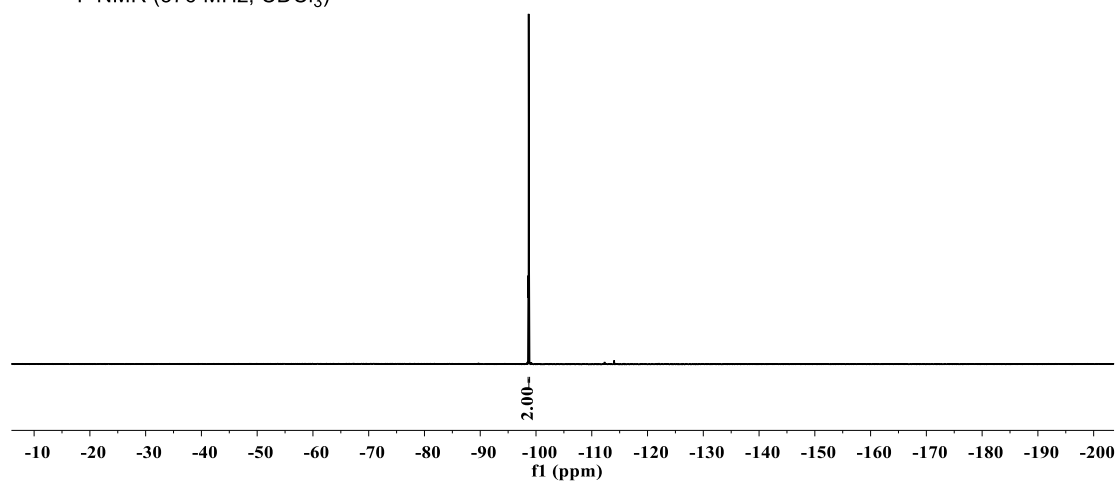

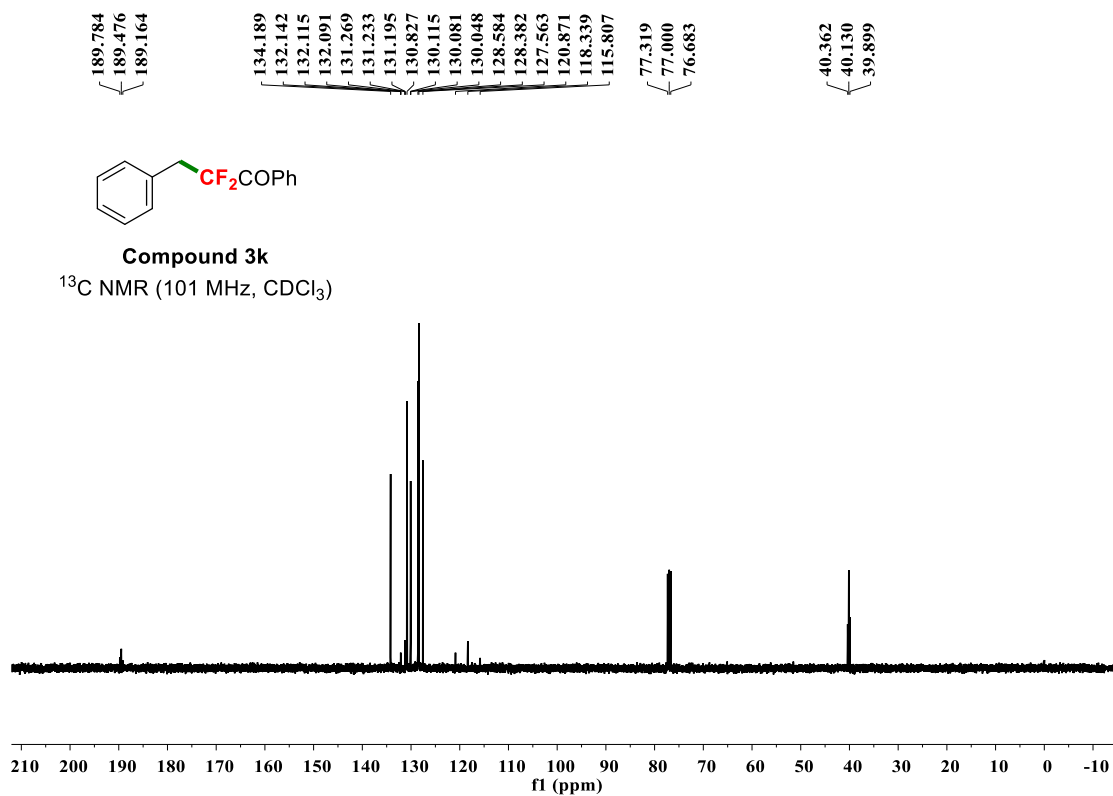

**2,2-Difluoro-1-phenyl-3-(pyridin-3-yl)propan-1-one (3l).**

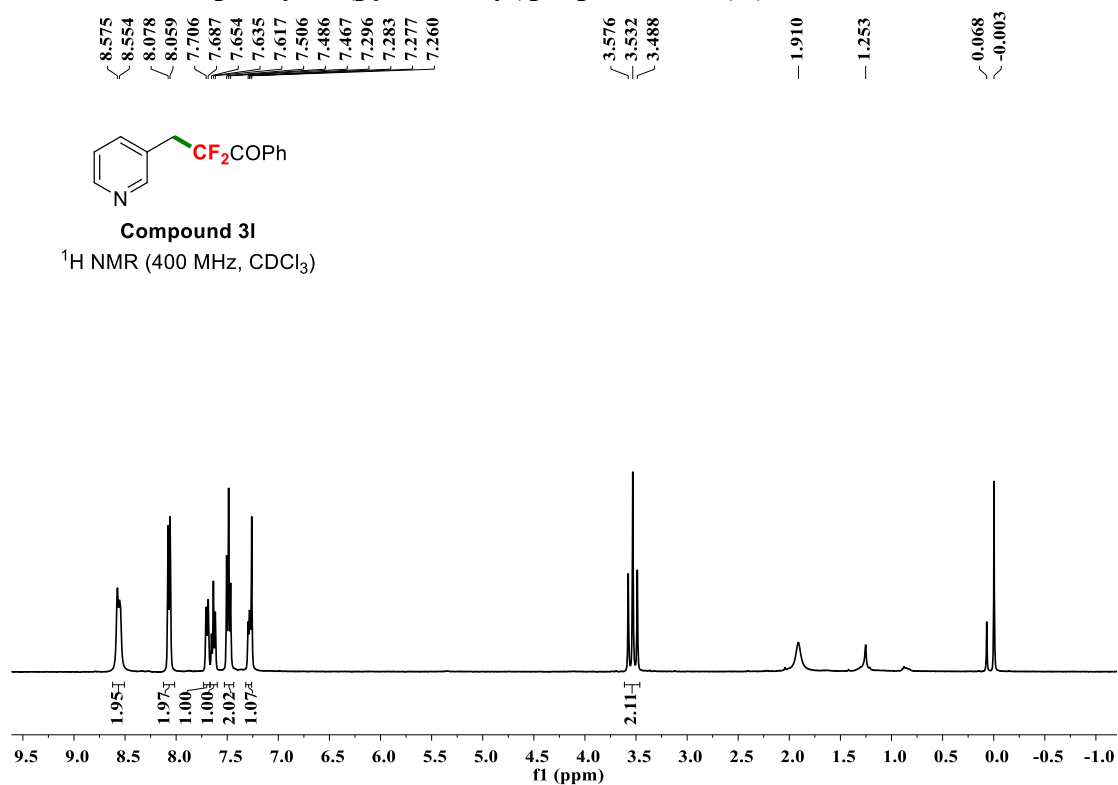

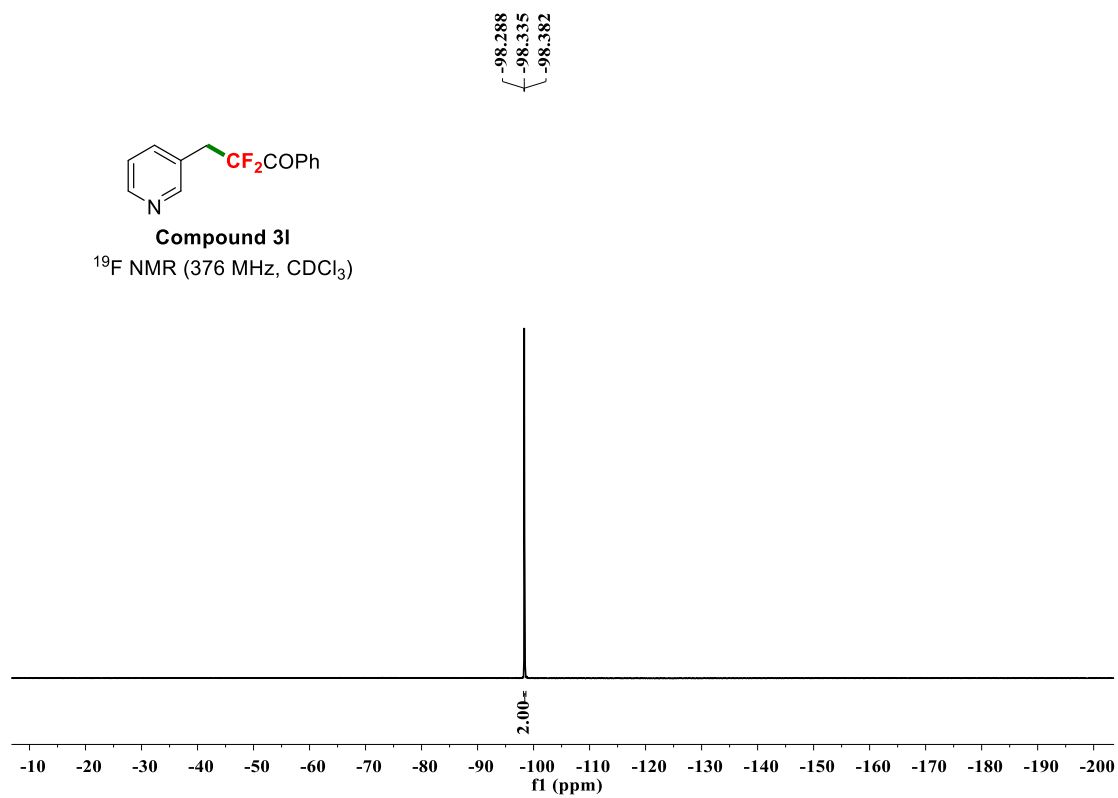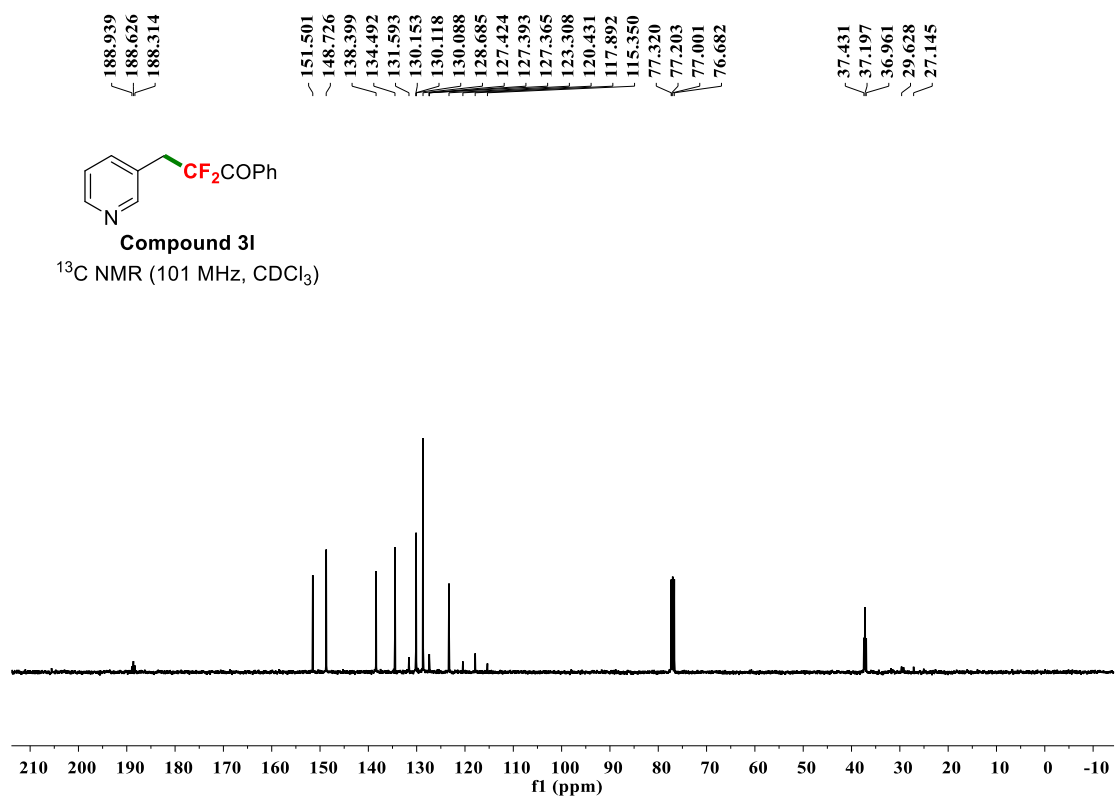

### 2,2-difluoro-1-phenyl-3-(thiophen-2-yl)propan-1-one (3m).

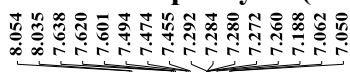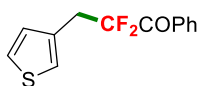

Compound 3m

<sup>1</sup>H NMR (400 MHz, CDCl<sub>3</sub>)

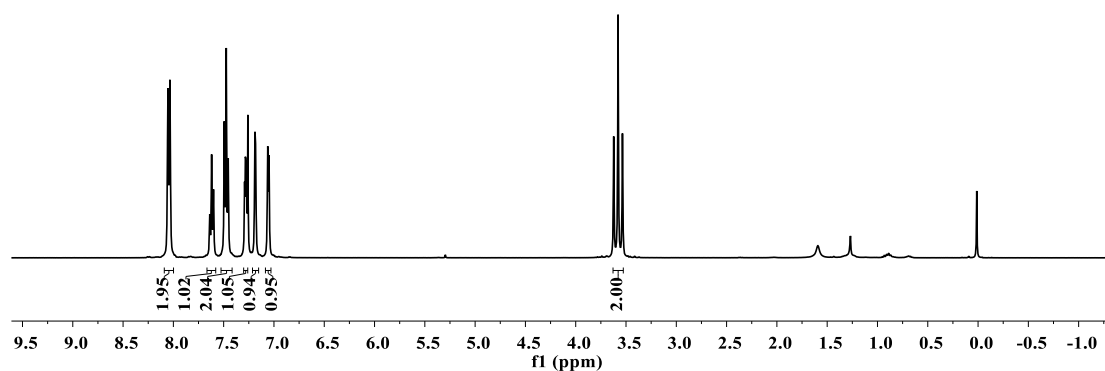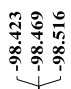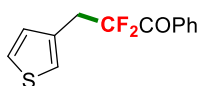

Compound 3m

<sup>19</sup>F NMR (376 MHz, CDCl<sub>3</sub>)

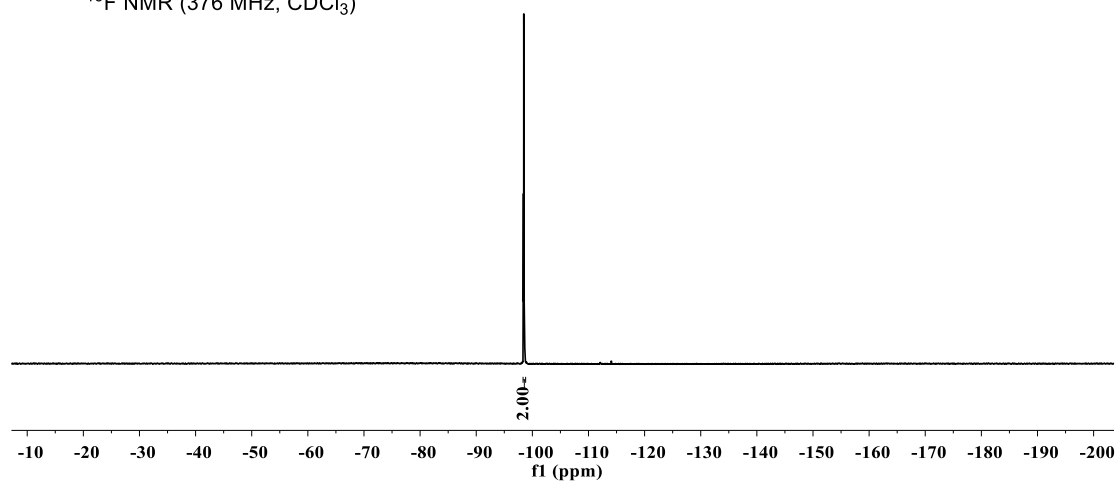

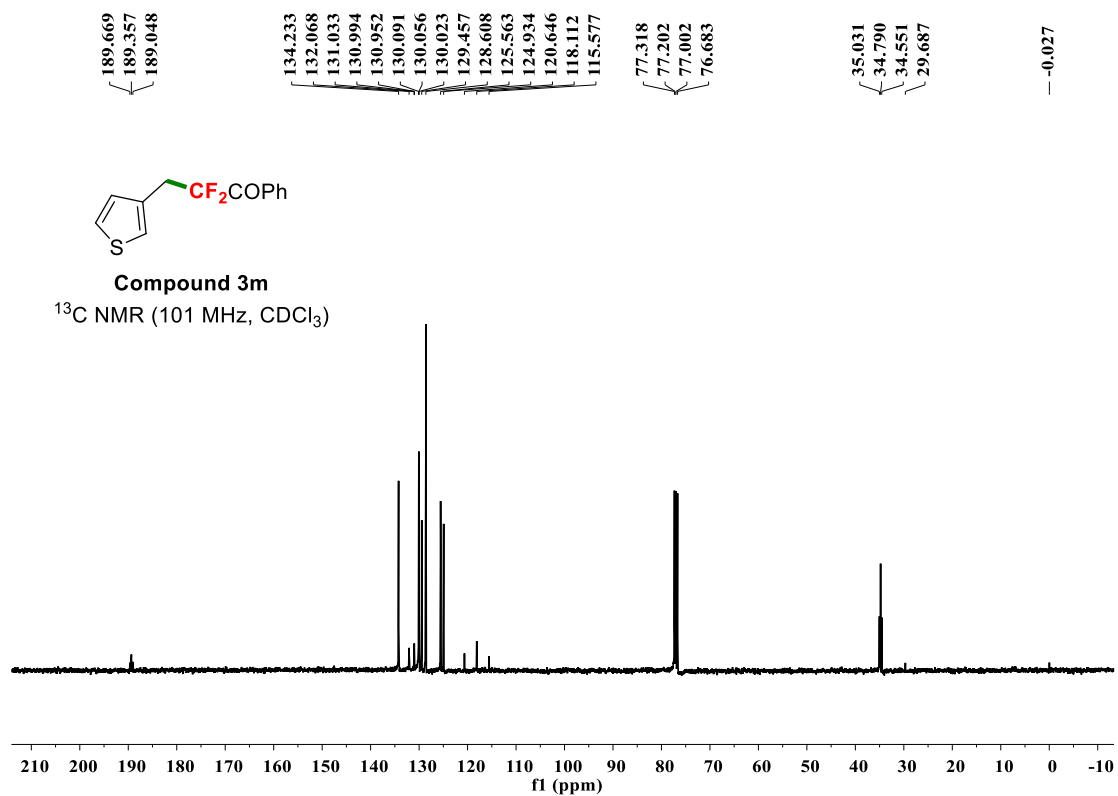

**Tert-butyl 3-(1,1-difluoro-2-oxo-2-phenylethyl)pyrrolidine-1-carboxylate (3n).**

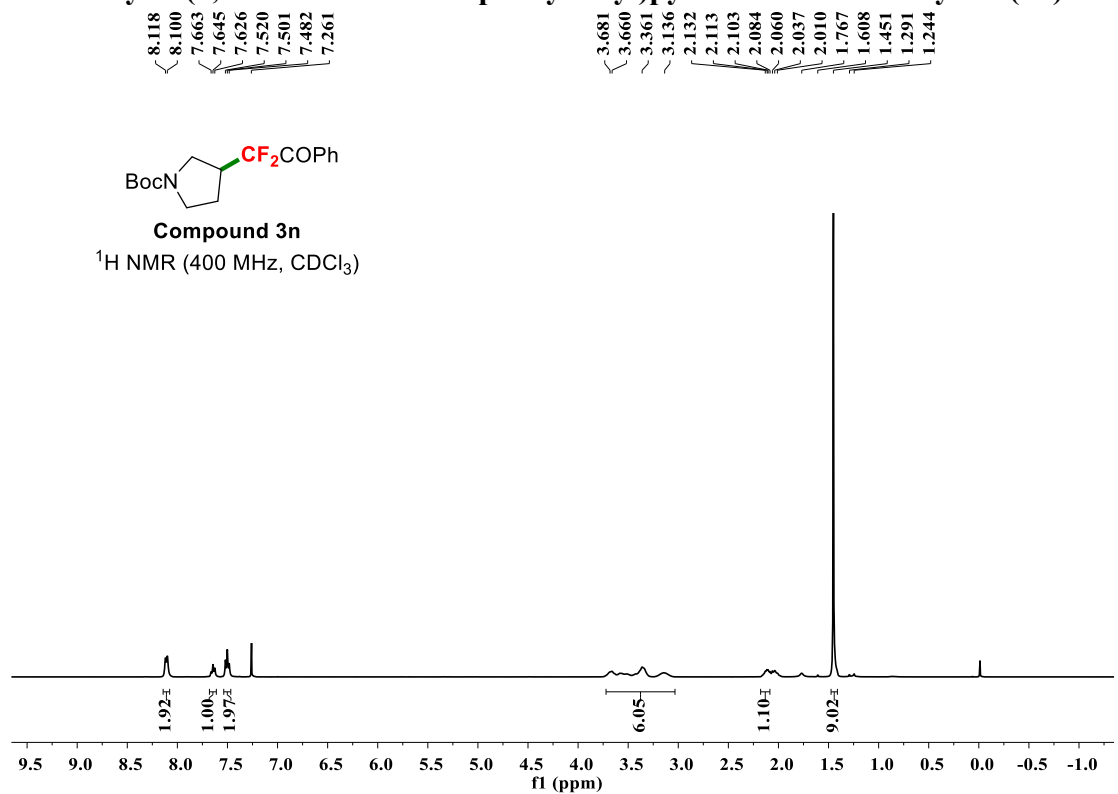



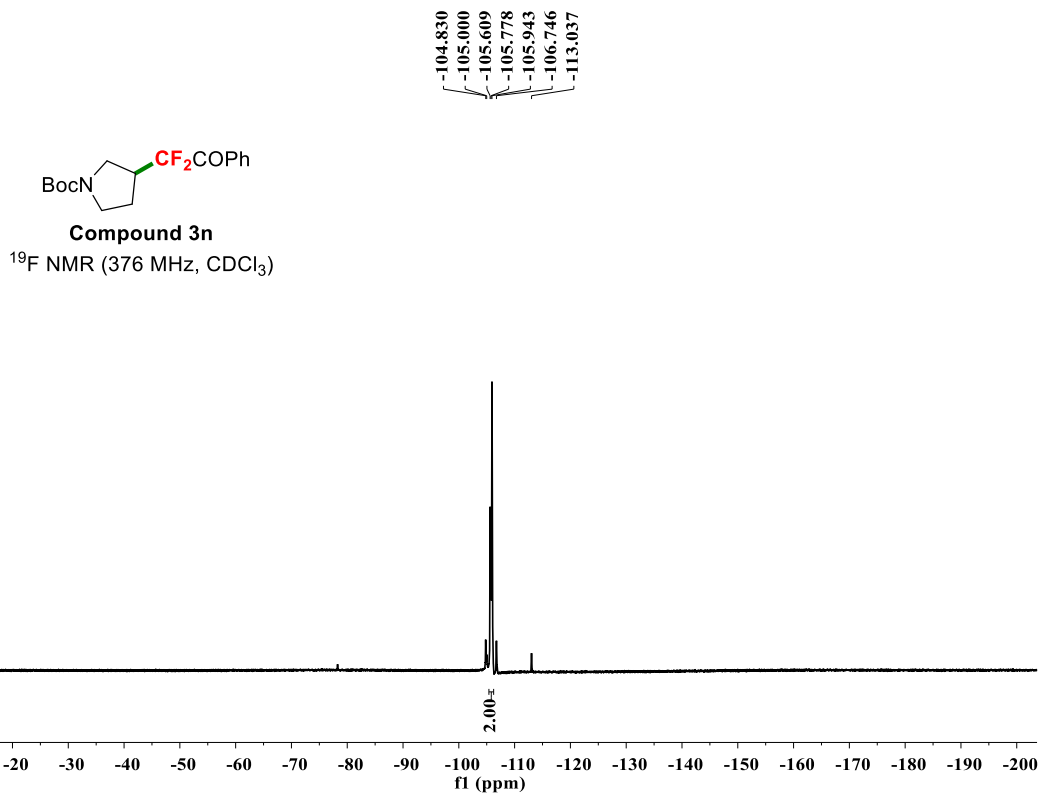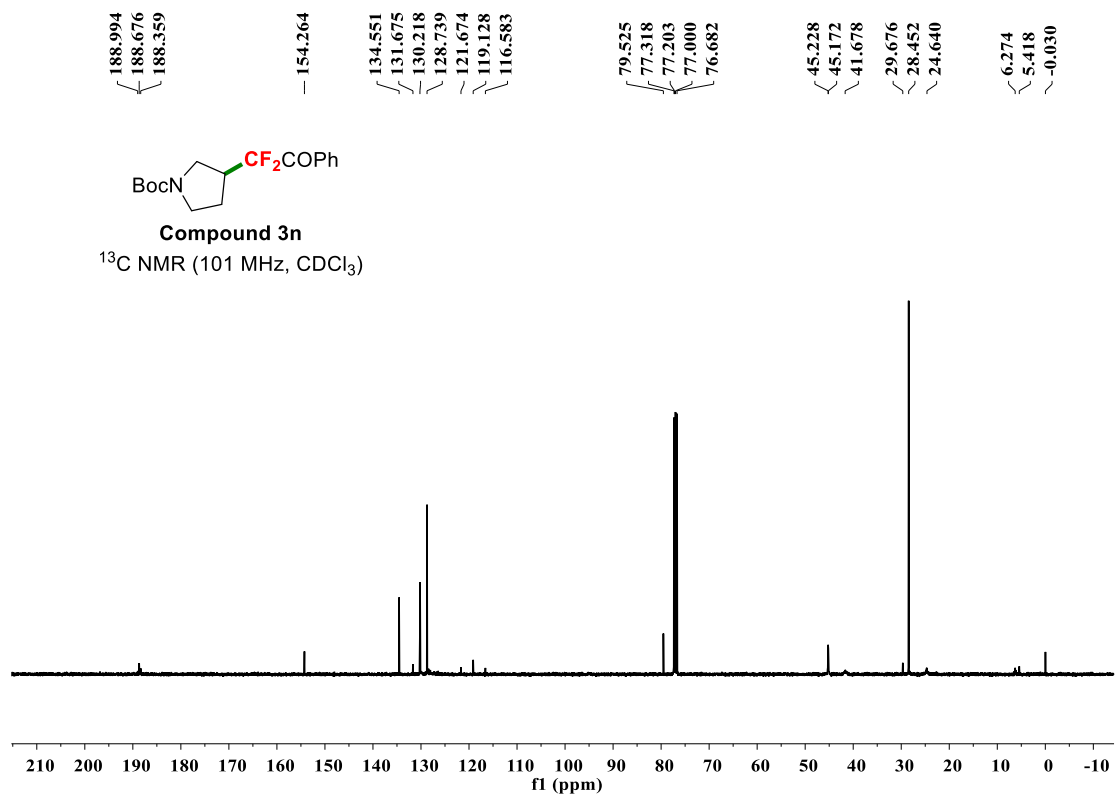

# Tert-butyl 4-(1,1-difluoro-2-oxo-2-phenylethyl)piperidine-1-carboxylate (3o).

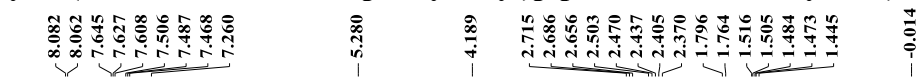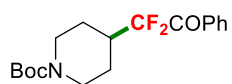

**Compound 3o**

<sup>1</sup>H NMR (400 MHz, CDCl<sub>3</sub>)

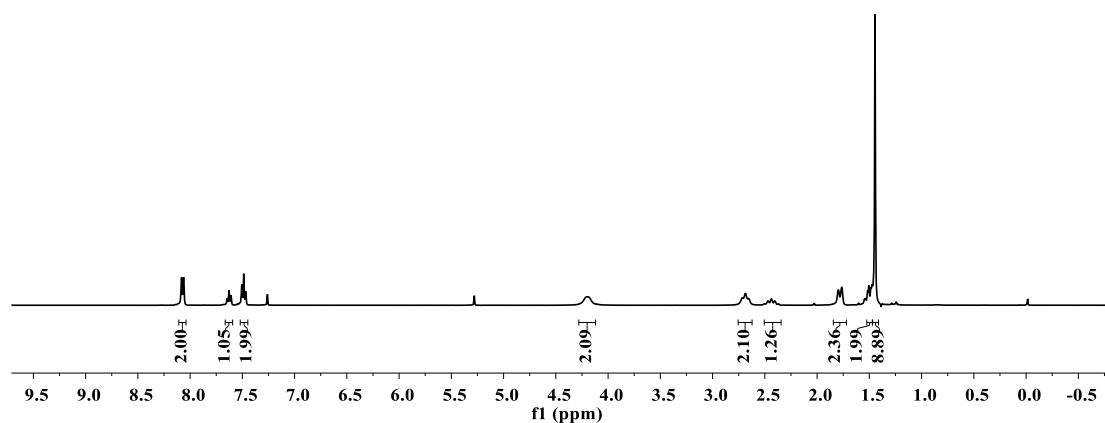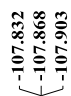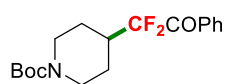

**Compound 3o**

<sup>19</sup>F NMR (376 MHz, CDCl<sub>3</sub>)

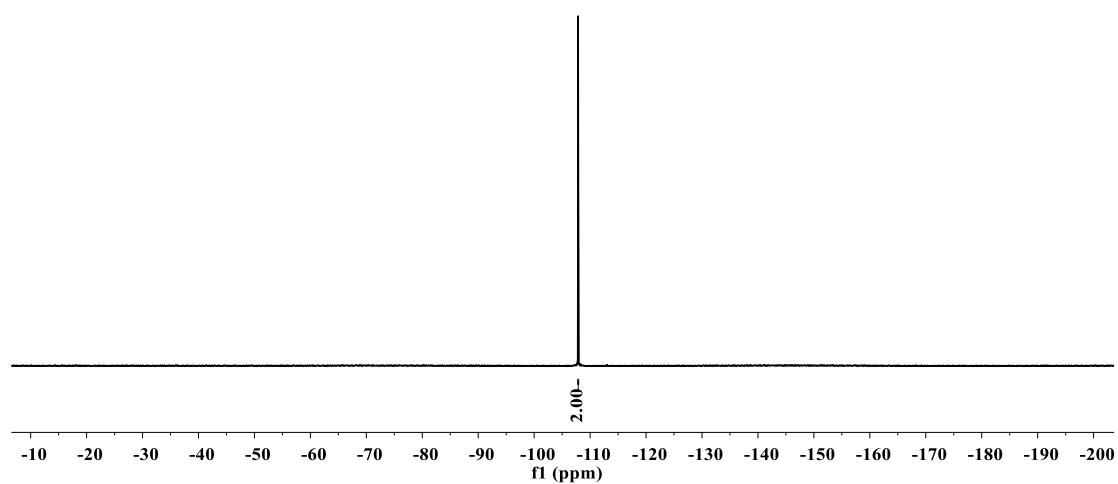

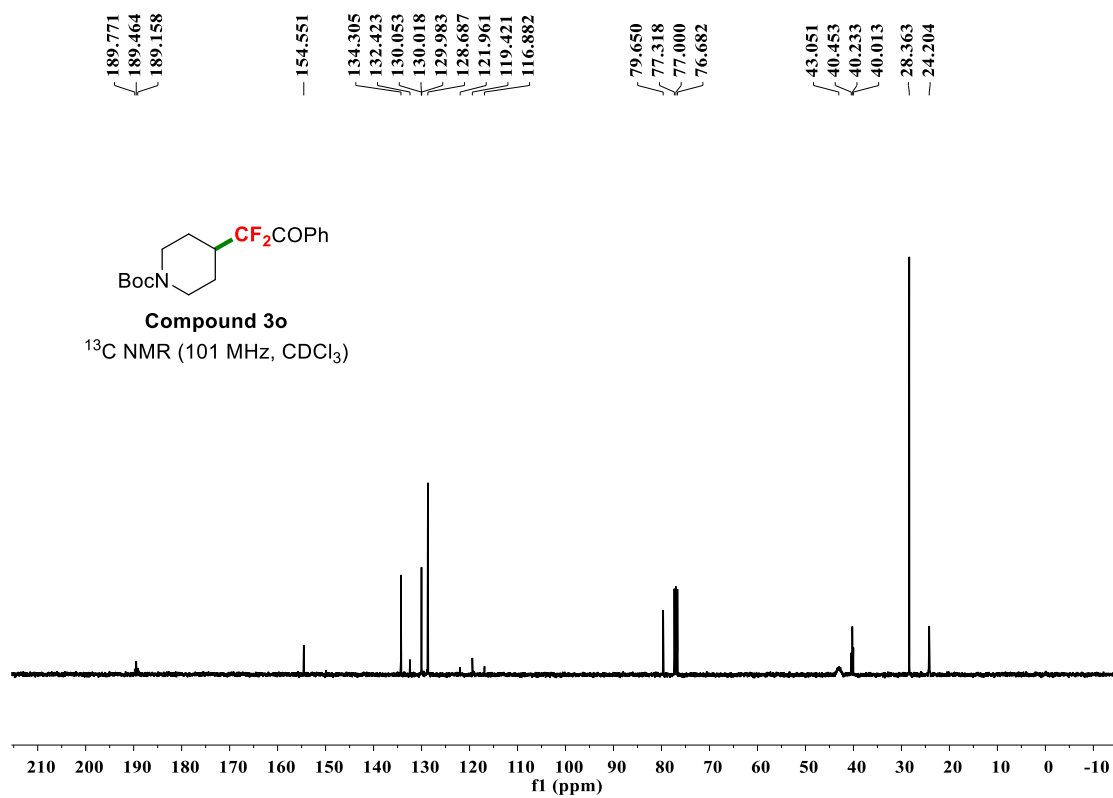

**2,2-Difluoro-1-phenyl-2-(tetrahydro-2H-pyran-4-yl)ethan-1-one (3p).**

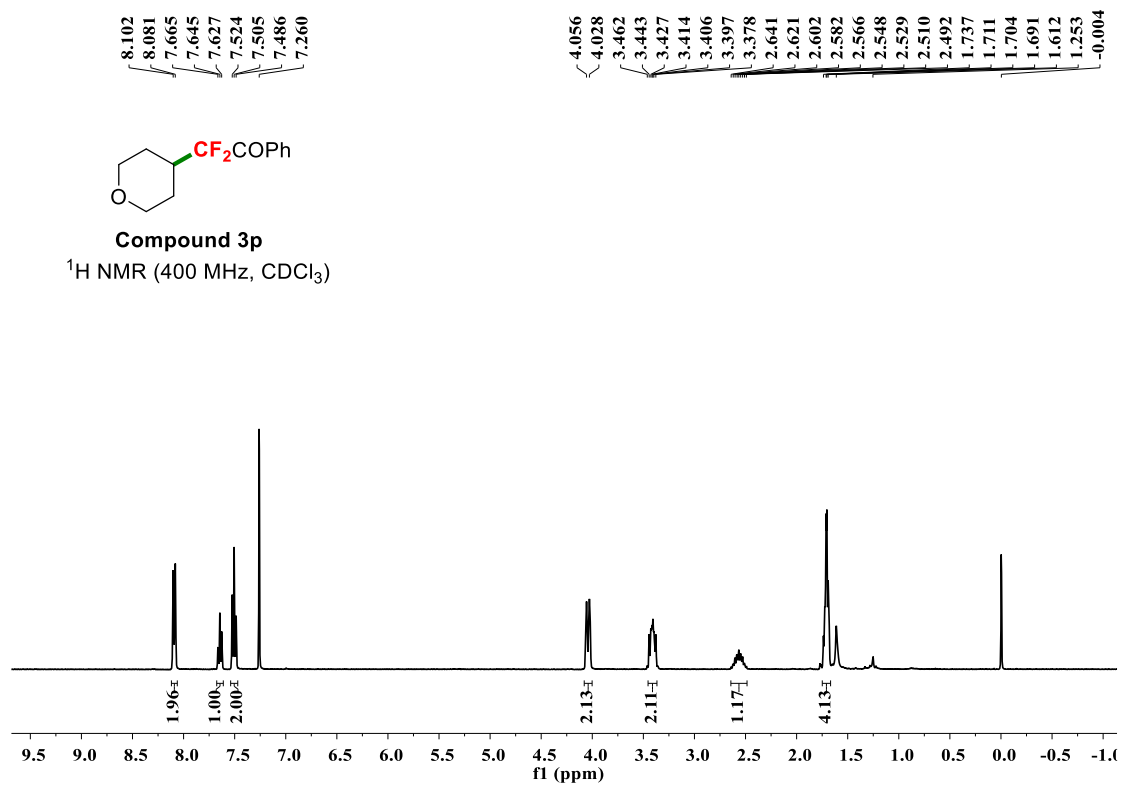

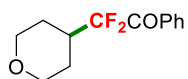

**Compound 3p**

$^{19}\text{F}$  NMR (376 MHz,  $\text{CDCl}_3$ )

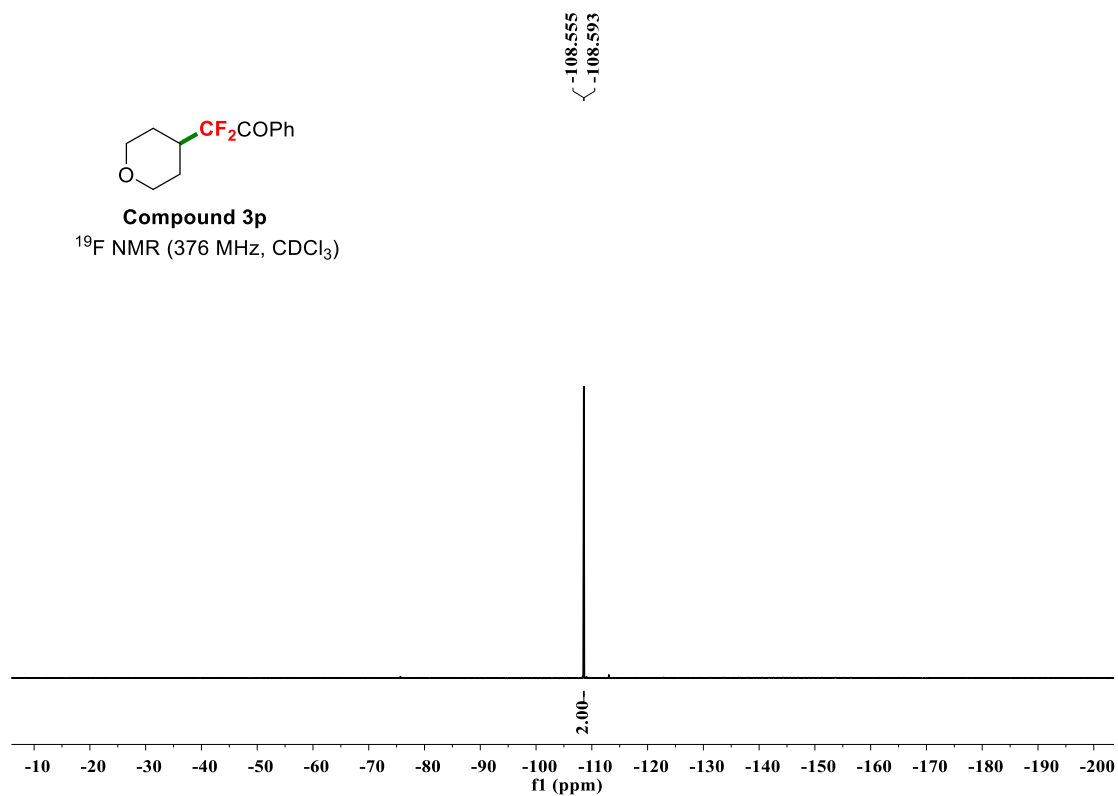

189.756  
189.449  
189.142

134.335  
132.419  
132.396  
132.373  
130.071  
130.036  
130.000  
128.706  
121.727  
119.190  
116.652

77.318  
77.202  
77.000  
76.681  
67.038

39.365  
39.143  
38.921  
29.669  
24.869  
24.825  
24.782

-0.042

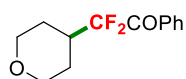

**Compound 3p**

$^{13}\text{C}$  NMR (101 MHz,  $\text{CDCl}_3$ )

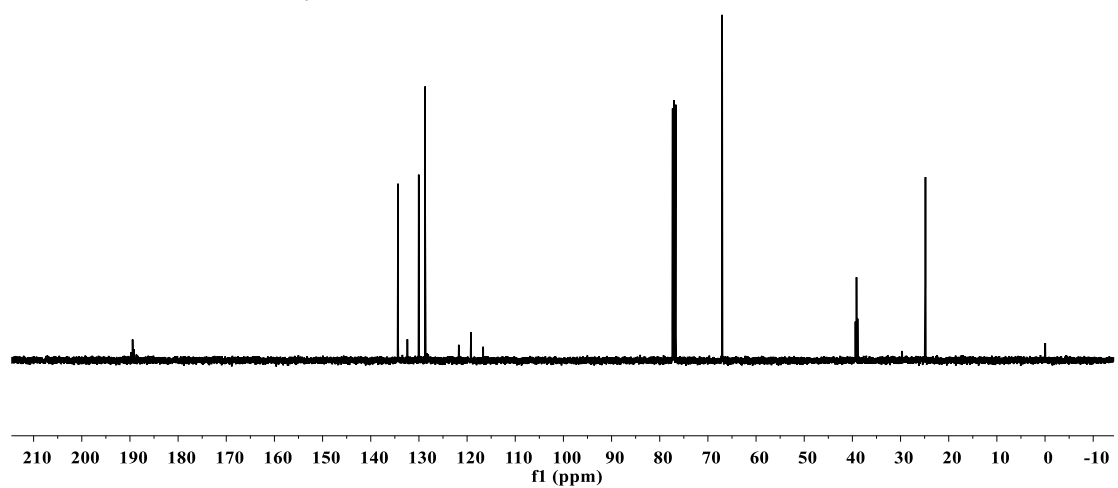

**2-Cyclododecyl-2,2-difluoro-1-phenylethan-1-one (3q).**

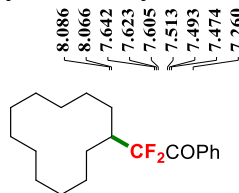

**Compound 3q**

<sup>1</sup>H NMR (400 MHz, CDCl<sub>3</sub>)

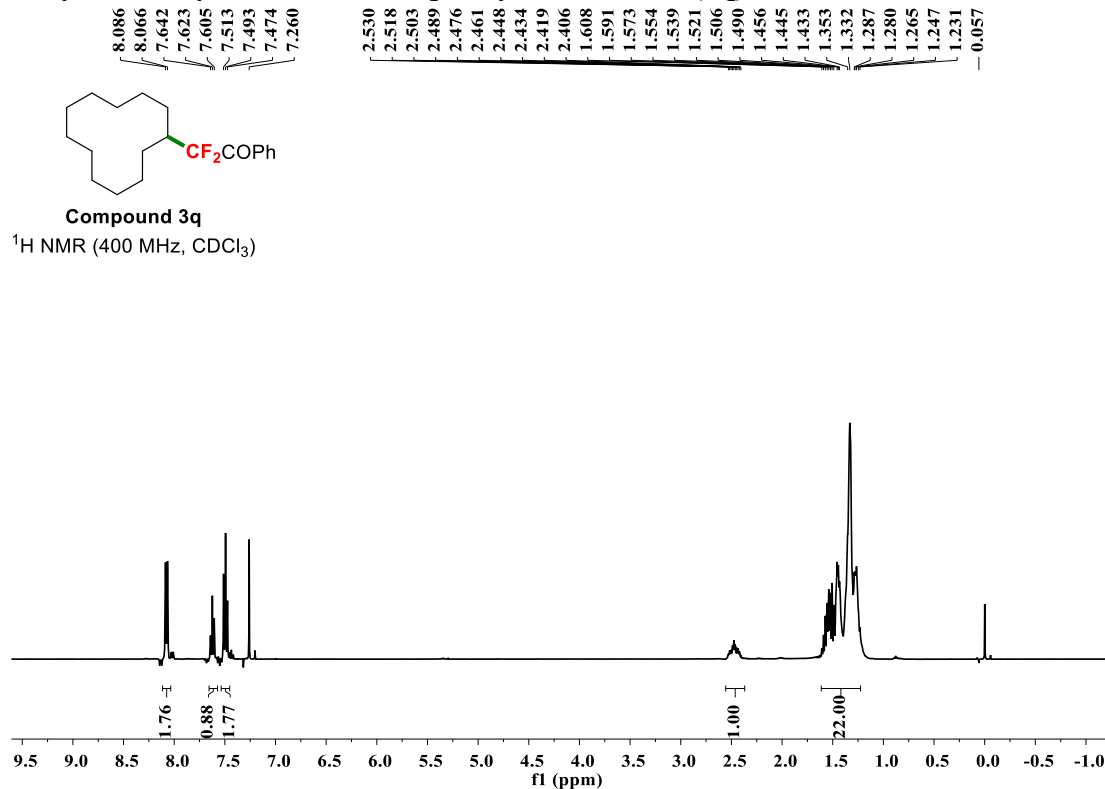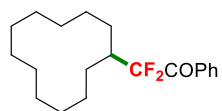

**Compound 3q**

<sup>19</sup>F NMR (376 MHz, CDCl<sub>3</sub>)

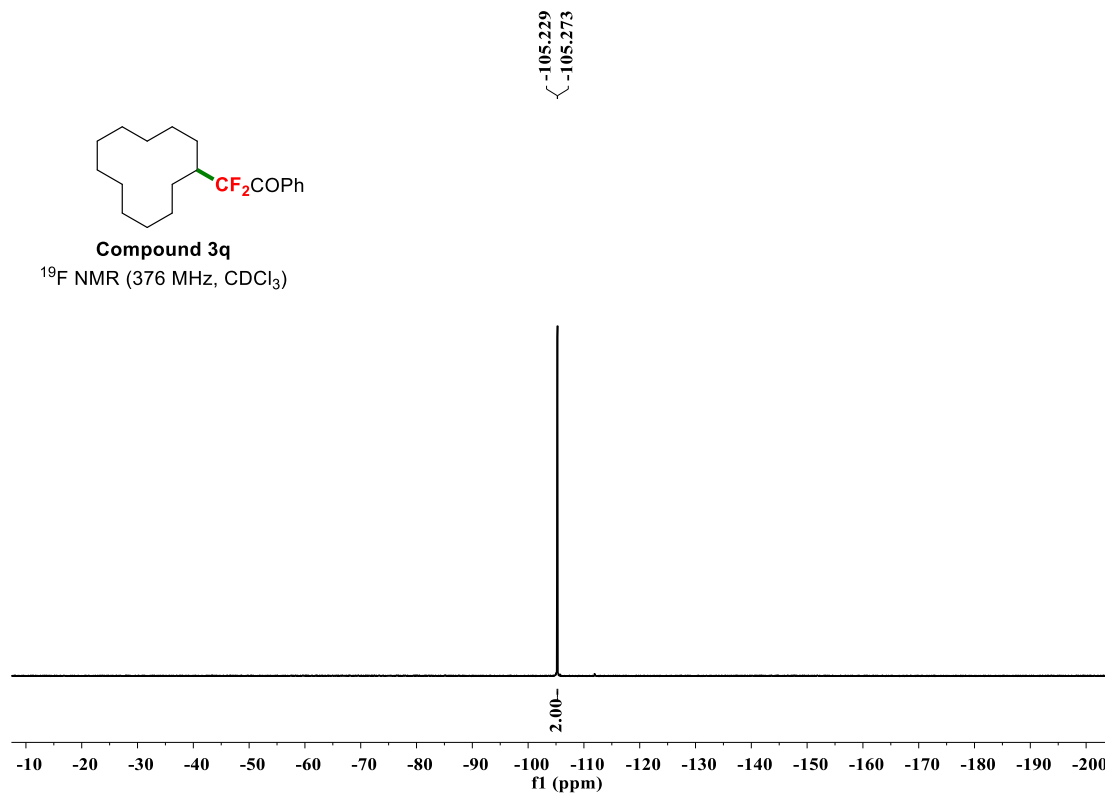

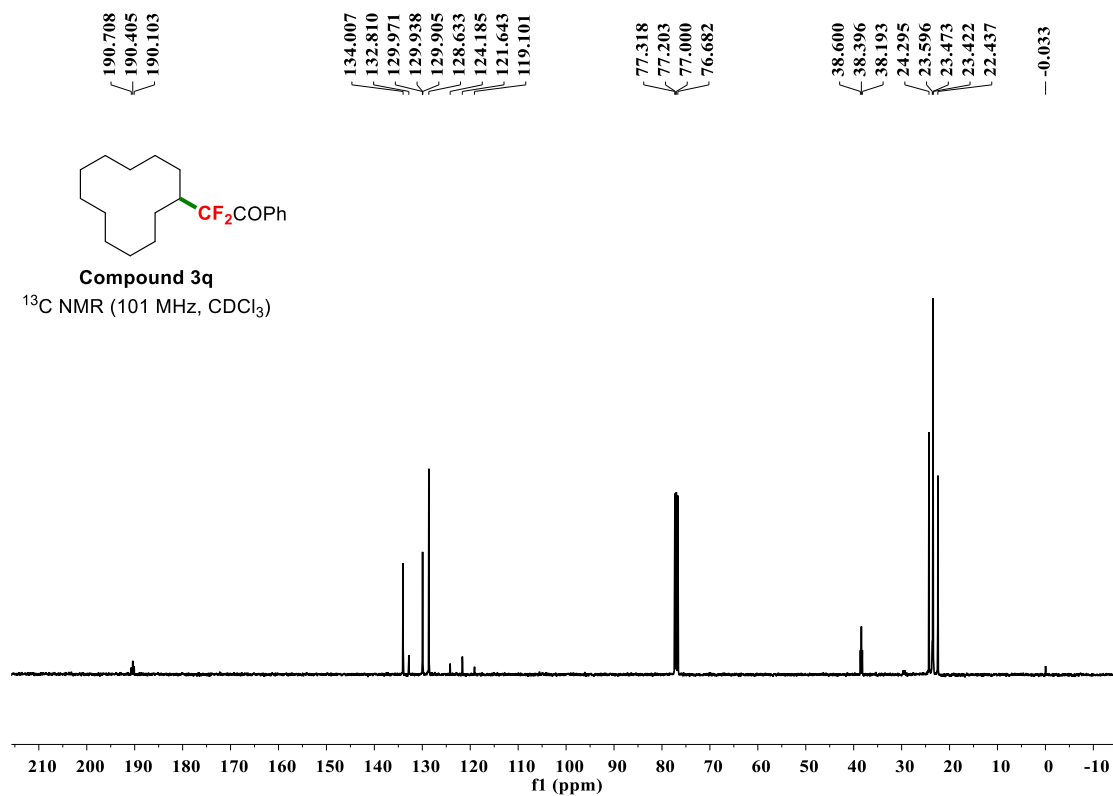

**2-Cyclooctyl-2,2-difluoro-1-phenylethan-1-one (3r).**

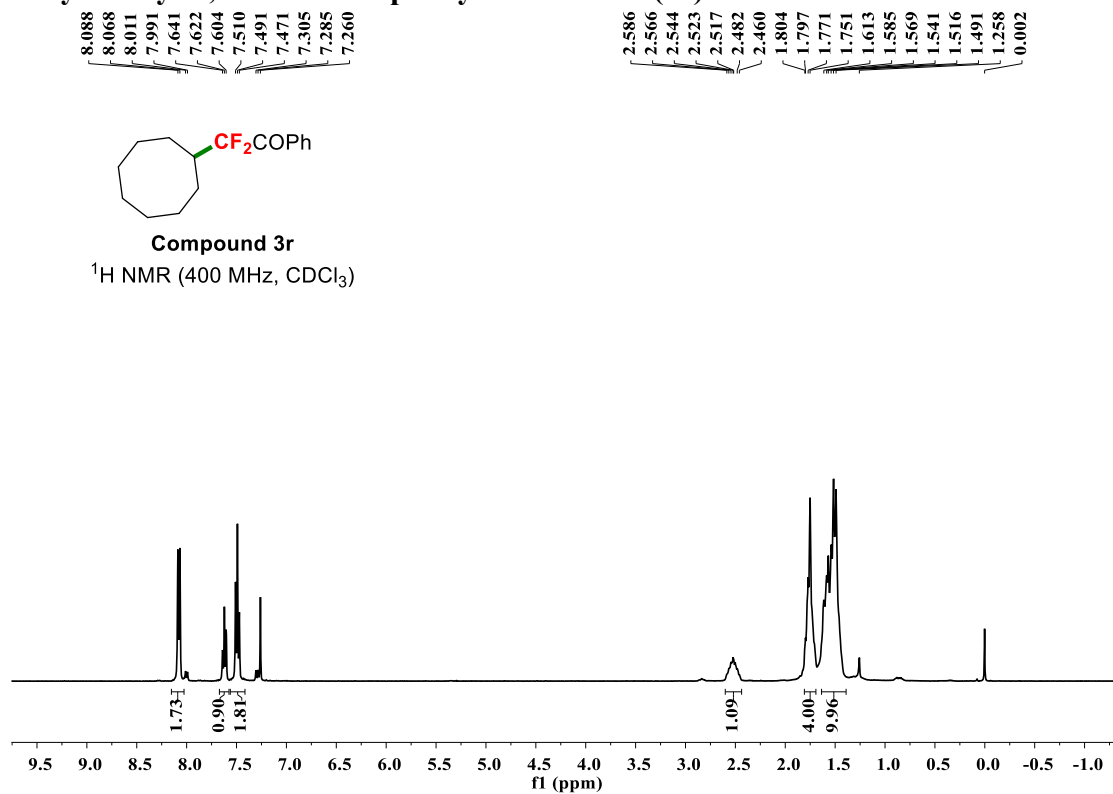

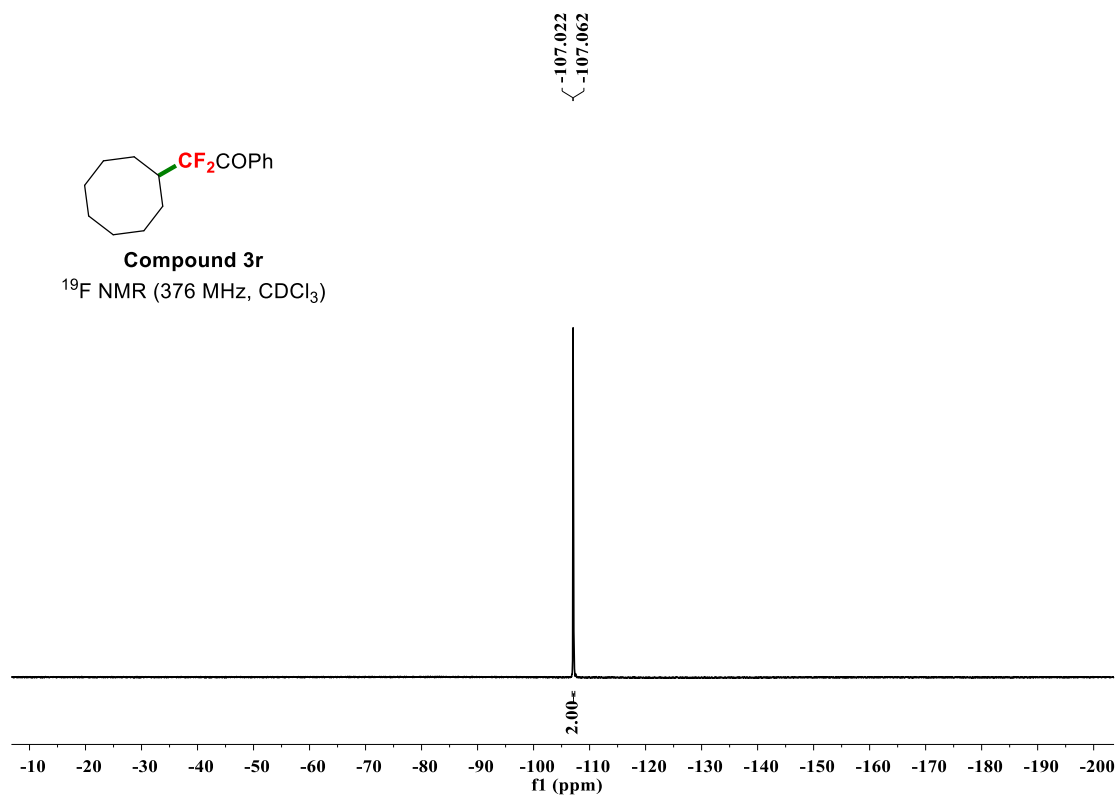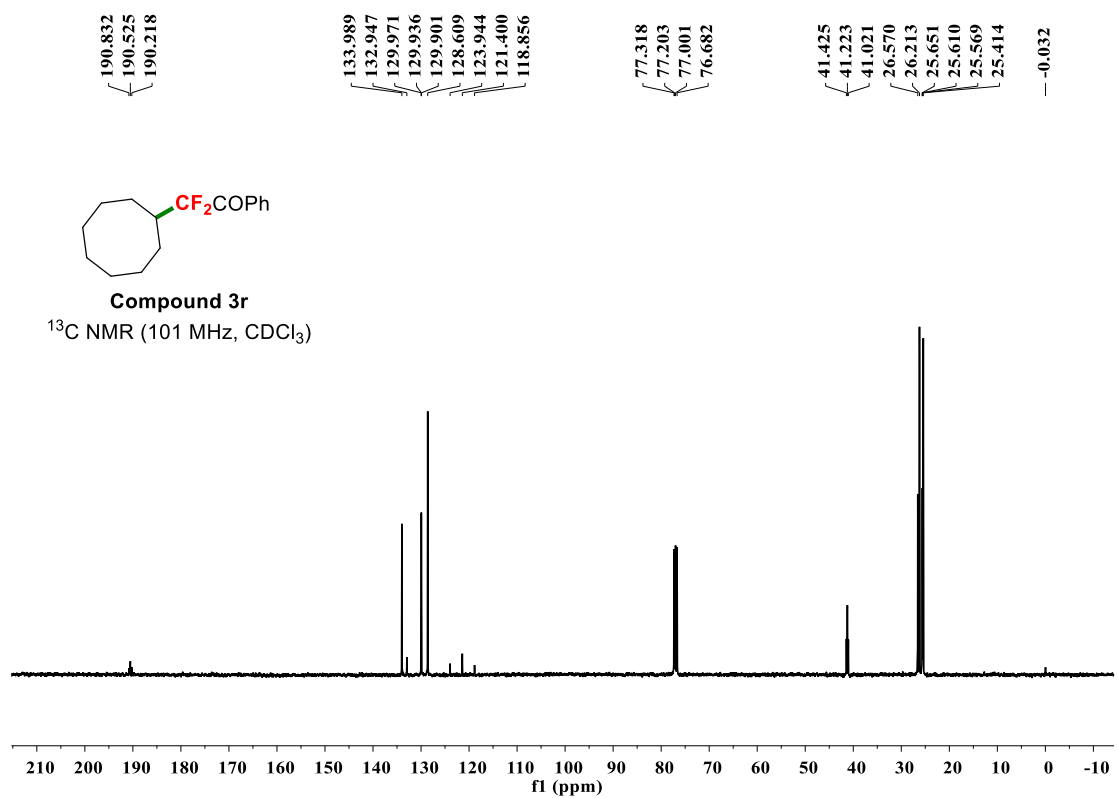

## 2-Cycloheptyl-2,2-difluoro-1-phenylethan-1-one (3s).

8.085  
8.065  
7.641  
7.622  
7.604  
7.509  
7.489  
7.470  
7.260  
2.444  
2.437  
2.428  
2.418  
2.404  
1.883  
1.874  
1.864  
1.856  
1.848  
1.840  
1.830  
1.821  
1.779  
1.776  
1.765  
1.758  
1.749  
1.741  
1.732  
1.724  
1.724  
1.638  
1.589  
1.579  
1.572  
1.563  
1.555  
1.546  
1.537  
1.530  
1.527  
1.512  
1.503  
1.485  
1.479  
1.463  
1.456  
1.446  
1.441  
1.435  
0.001

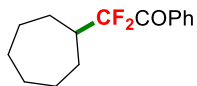

Compound 3s

$^1\text{H}$  NMR (400 MHz,  $\text{CDCl}_3$ )

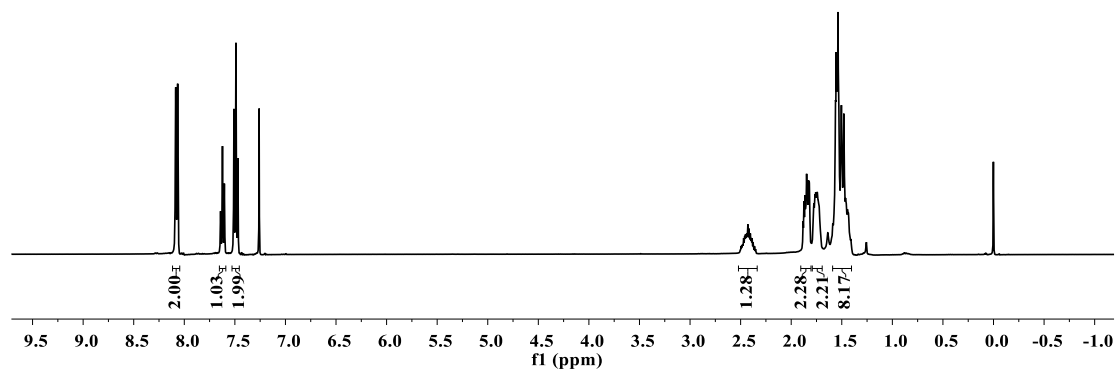

-106.925  
-106.969

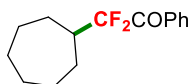

Compound 3s

$^{19}\text{F}$  NMR (376 MHz,  $\text{CDCl}_3$ )

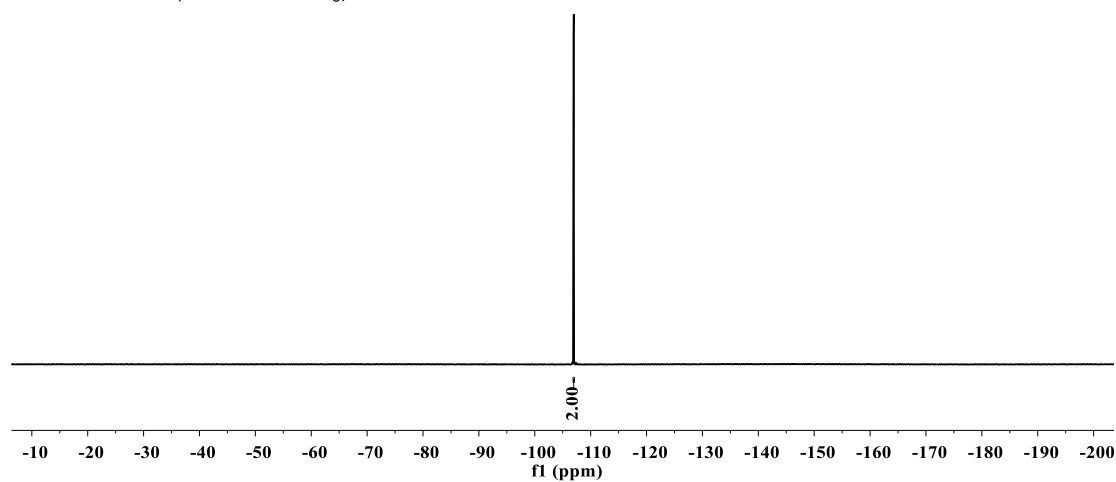



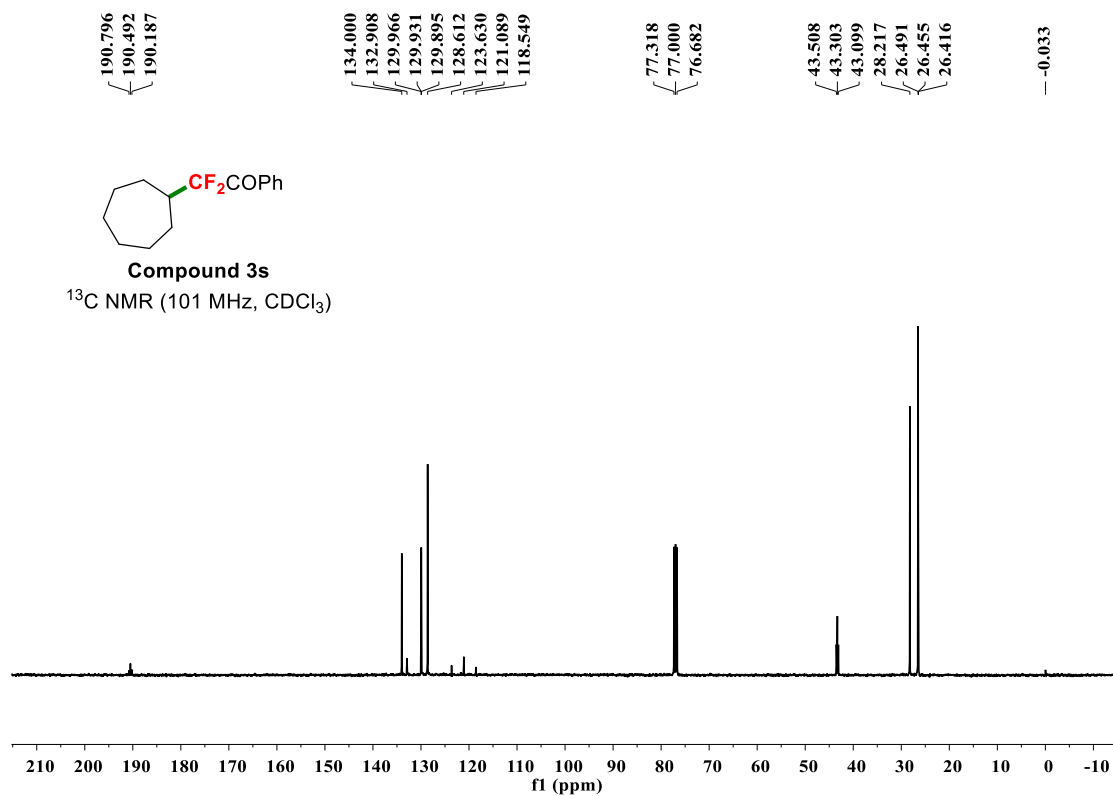

**2-Cyclohexyl-2,2-difluoro-1-phenylethan-1-one (3t).**

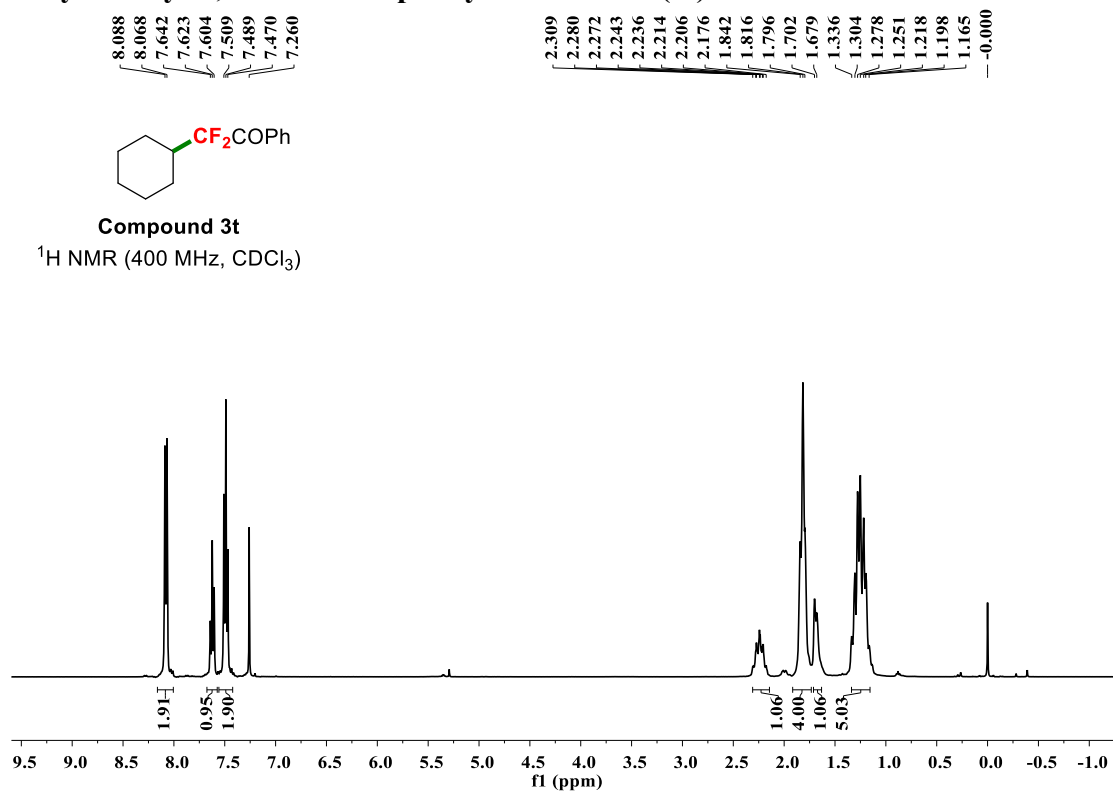

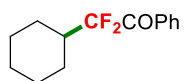

**Compound 3t**

$^{19}\text{F}$  NMR (376 MHz,  $\text{CDCl}_3$ )

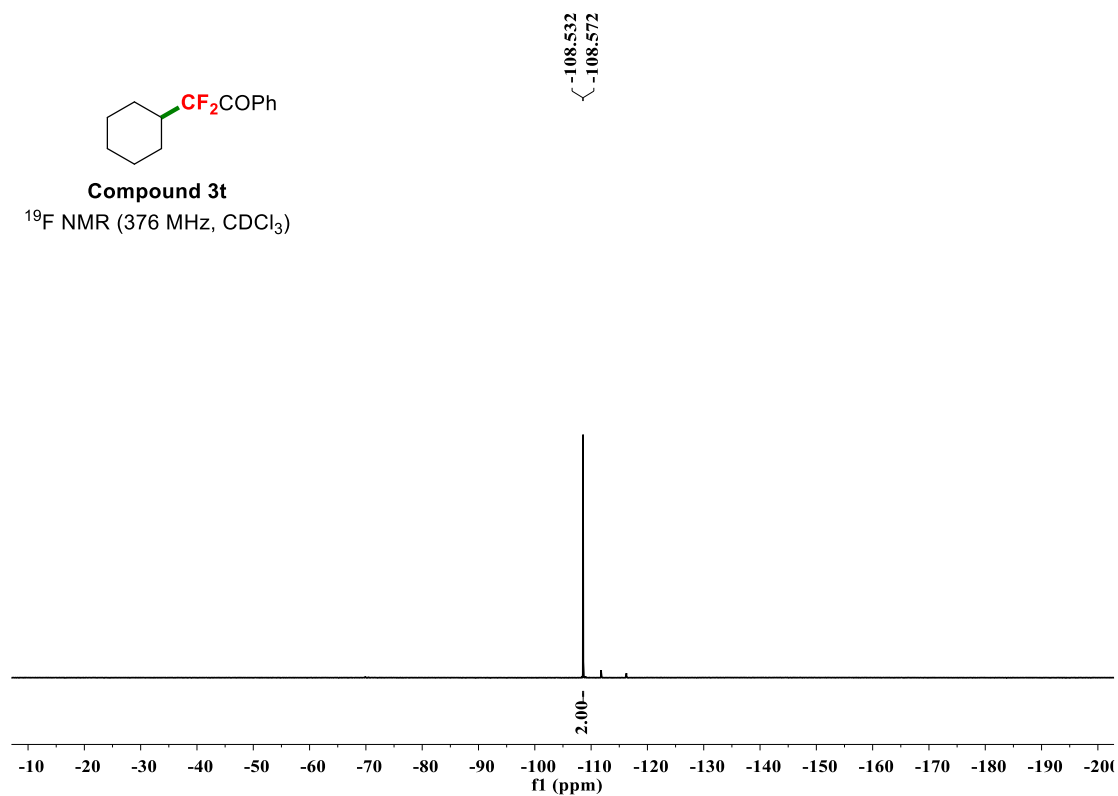

190.674  
190.374  
190.073

134.036  
132.918  
132.900  
132.882  
130.008  
129.936  
129.972  
128.626  
122.829  
120.299  
117.769

77.319  
77.203  
77.001  
76.683

42.331  
42.115  
41.900  
25.853  
25.420  
24.841  
24.799  
24.757

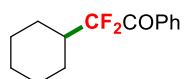

**Compound 3t**

$^{13}\text{C}$  NMR (101 MHz,  $\text{CDCl}_3$ )

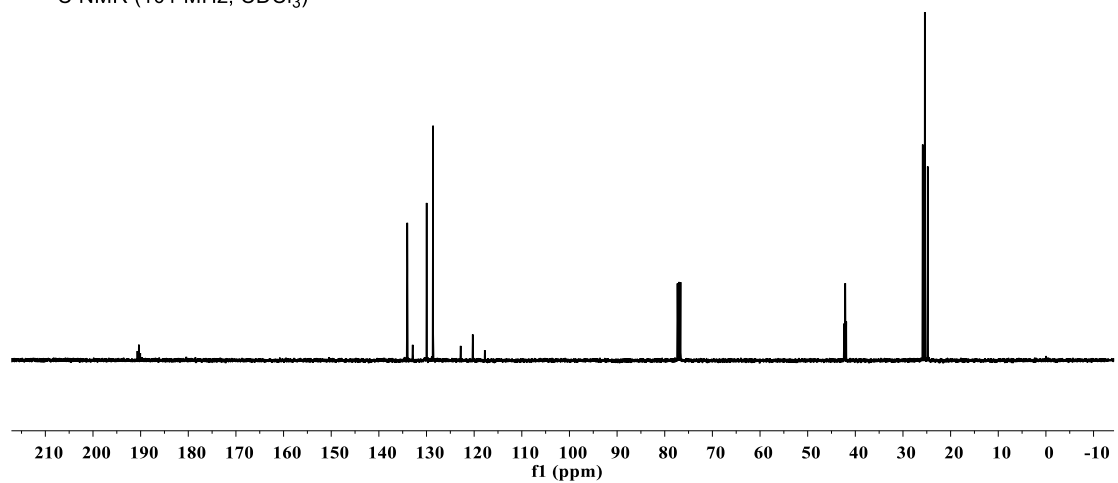

### 2-(2,3-Dihydro-1H-inden-2-yl)-2,2-difluoro-1-phenylethan-1-one (3u).

8.186  
8.184  
8.165  
8.162  
8.104  
7.683  
7.679  
7.676  
7.665  
7.661  
7.657  
7.645  
7.642  
7.639  
7.546  
7.526  
7.507  
7.468  
7.260  
7.244  
7.235  
7.232  
7.222  
7.213  
7.205  
7.196  
7.187  
7.182  
7.173  
7.164  
7.137  
3.495  
3.477  
3.455  
3.437  
3.432  
3.415  
3.411  
3.392  
3.229  
3.209  
3.205  
3.188  
3.181  
3.150  
3.142  
3.130  
3.123  
1.281  
0.026

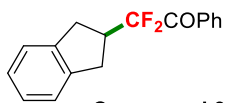

Compound 3u

<sup>1</sup>H NMR (400 MHz, CDCl<sub>3</sub>)

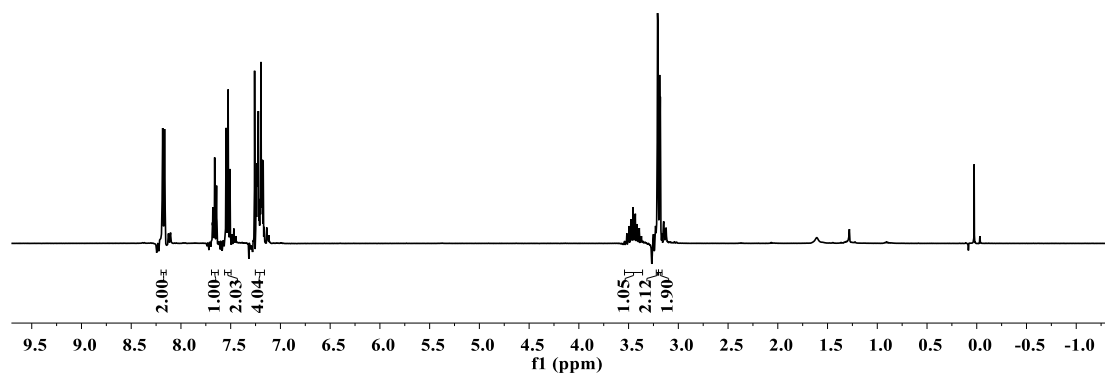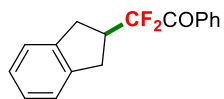

Compound 3u

<sup>13</sup>C NMR (376 MHz, CDCl<sub>3</sub>)

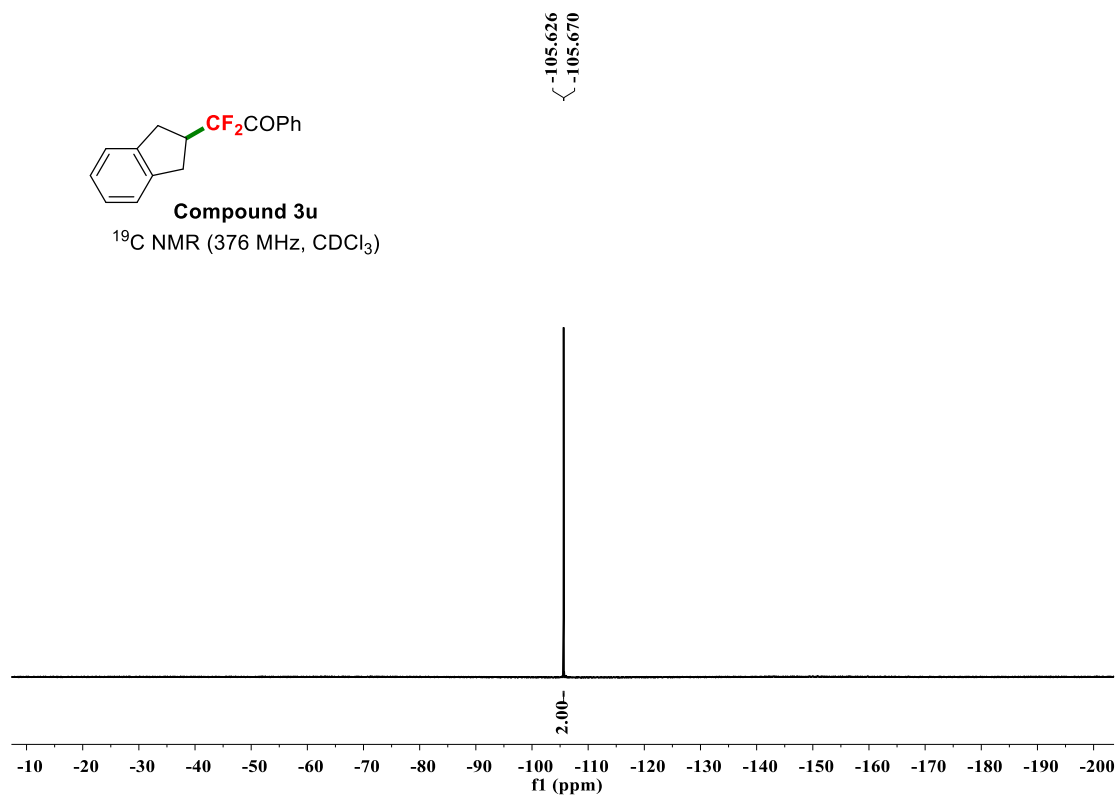

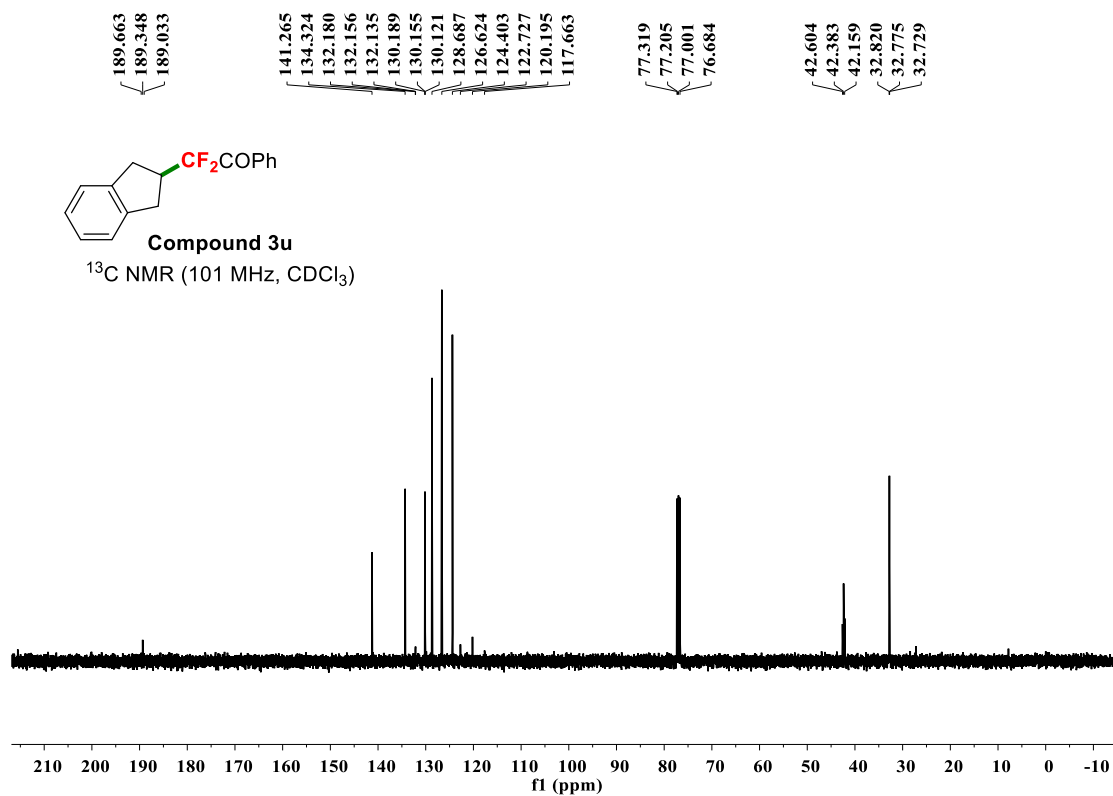

**2-(4,4-difluorocyclohexyl)-2,2-difluoro-1-phenylethan-1-one (3v).**

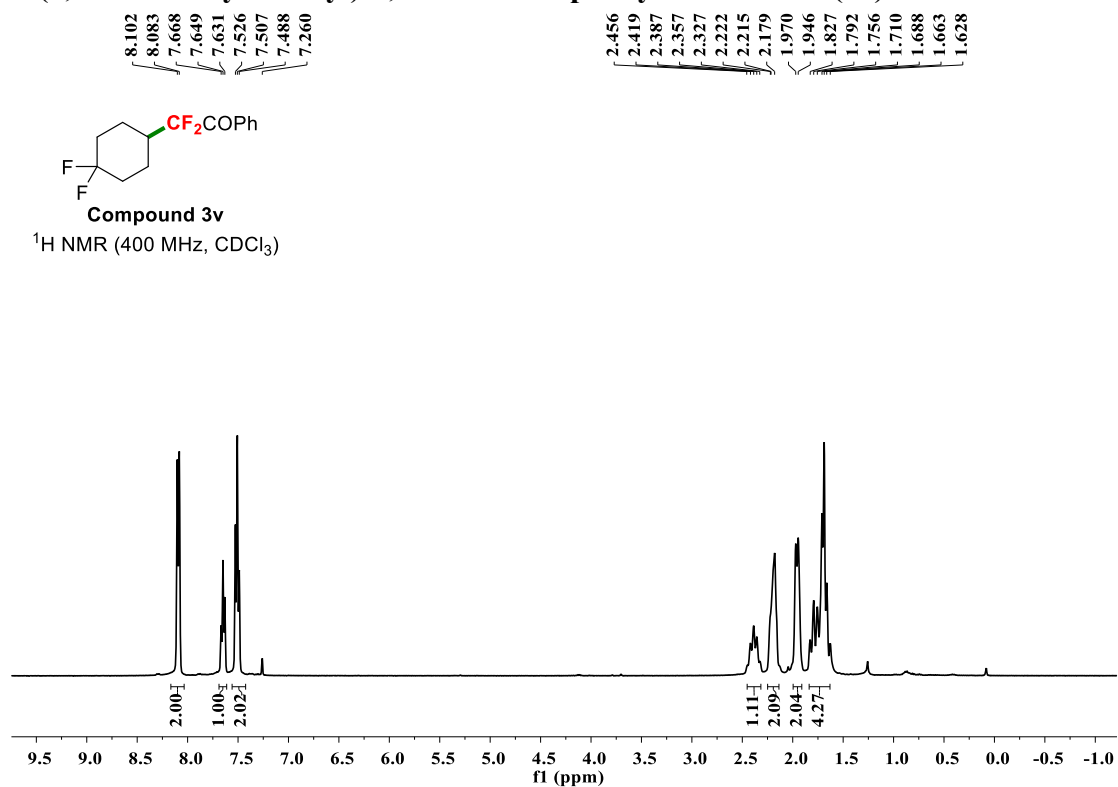

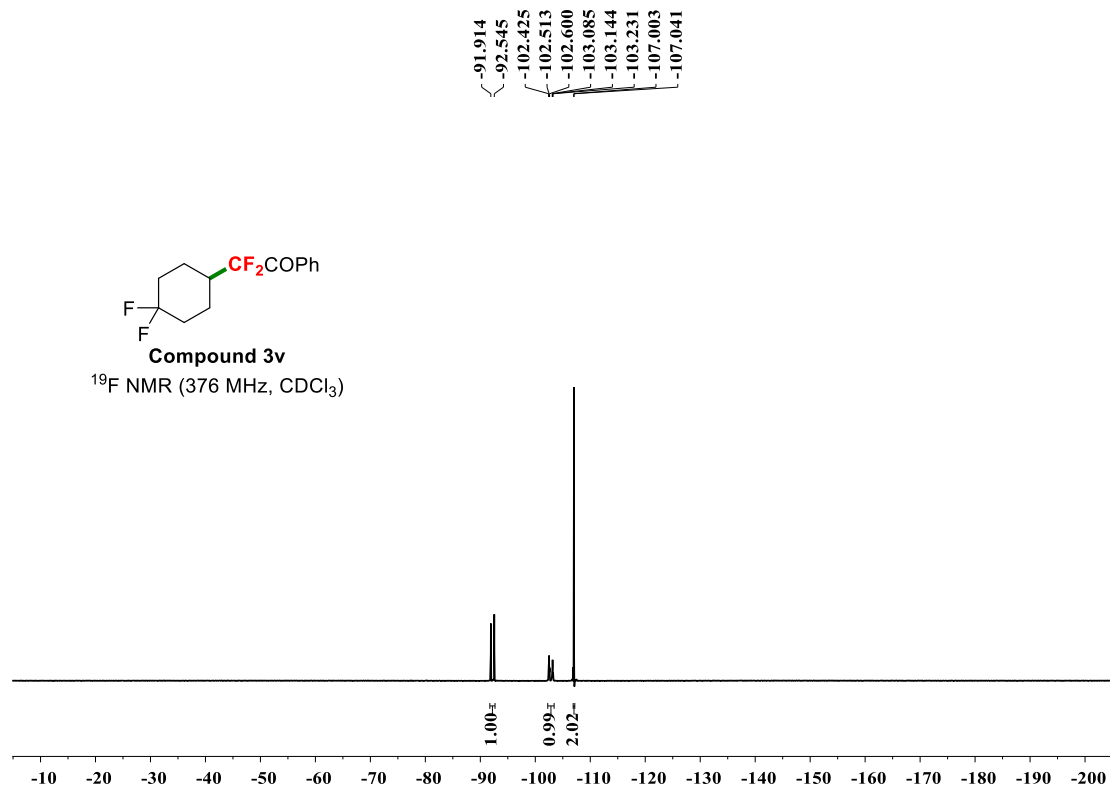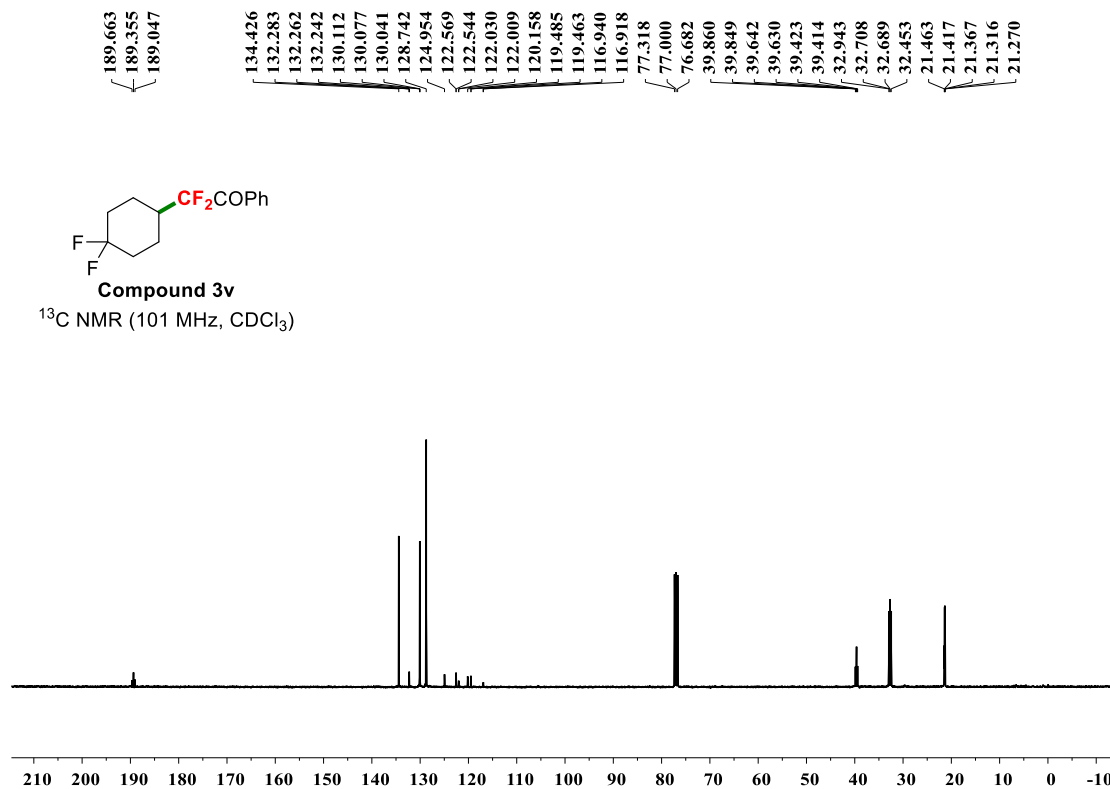

## 2,2-Difluoro-3-methyl-1,5-diphenylpentan-1-one (3w).

8.039, 8.019, 7.634, 7.617, 7.597, 7.486, 7.467, 7.447, 7.278, 7.260, 7.240, 7.193, 7.176, 7.155, 7.136, 2.841, 2.829, 2.815, 2.805, 2.794, 2.781, 2.769, 2.621, 2.602, 2.579, 2.563, 2.544, 2.454, 2.440, 2.431, 2.408, 2.033, 2.025, 2.017, 2.008, 1.999, 1.991, 1.984, 1.672, 1.658, 1.648, 1.635, 1.624, 1.612, 1.600, 1.576, 1.255, 1.136, 1.119, 0.001

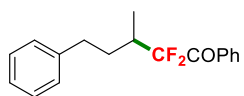

**Compound 3w**

$^1\text{H}$  NMR (400 MHz,  $\text{CDCl}_3$ )

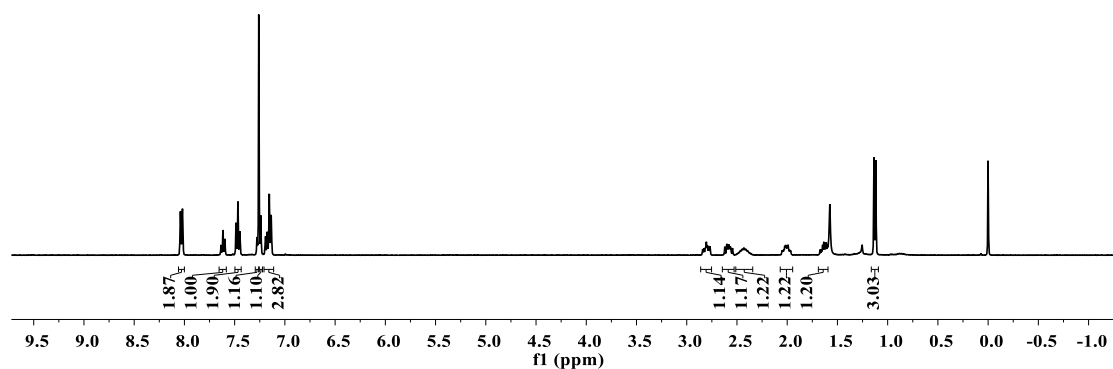

-107.533, -107.579, -107.622

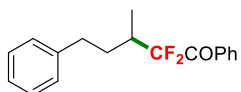

**Compound 3w**

$^{19}\text{F}$  NMR (376 MHz,  $\text{CDCl}_3$ )

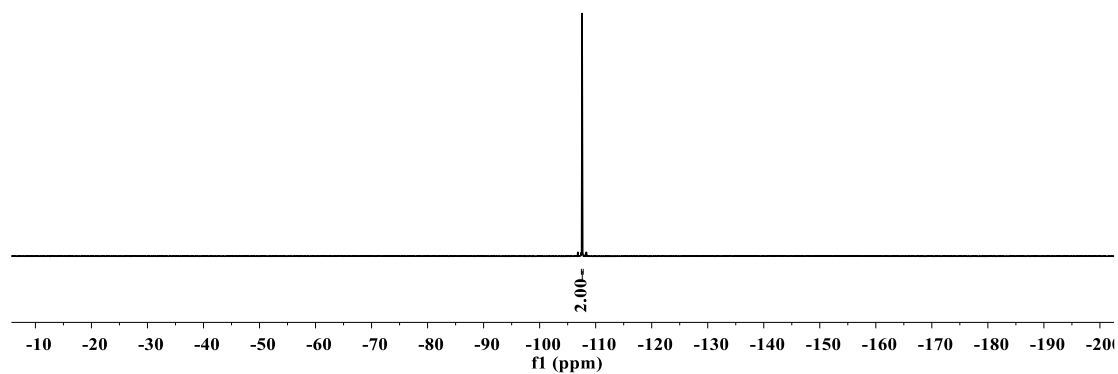

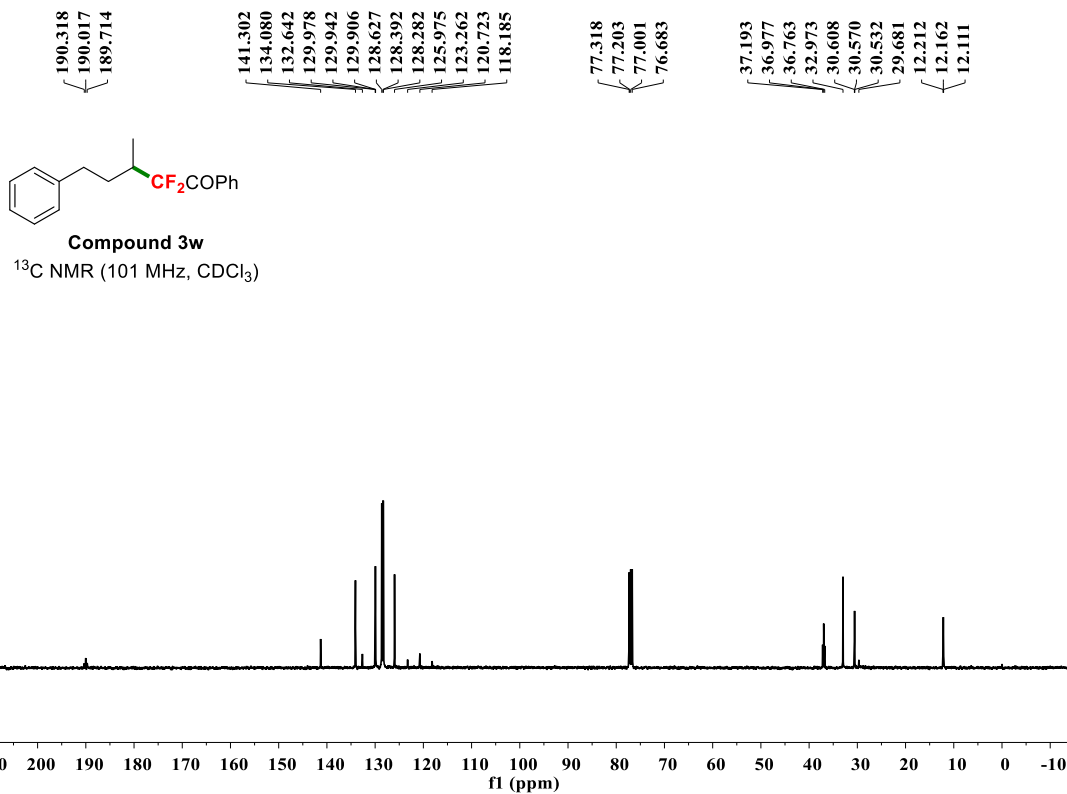

**Methyl-4,4-difluoro-3-methyl-5-oxo-5-phenylpentanoate (3x).**

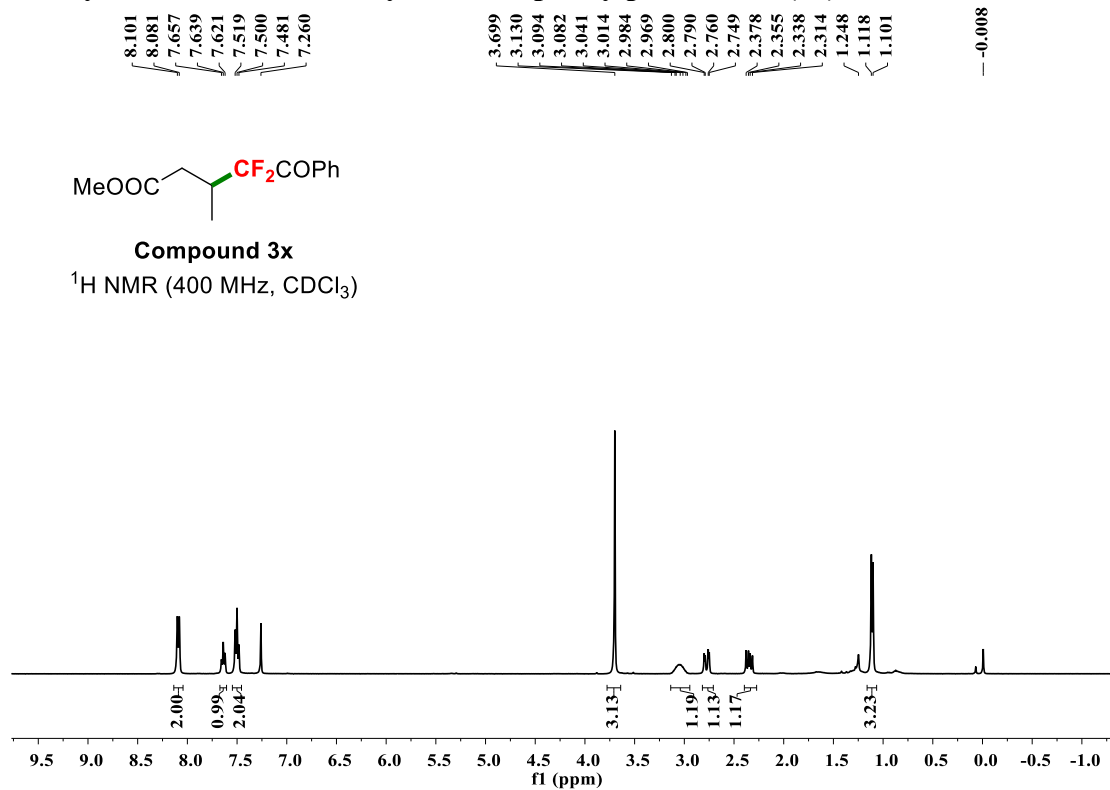

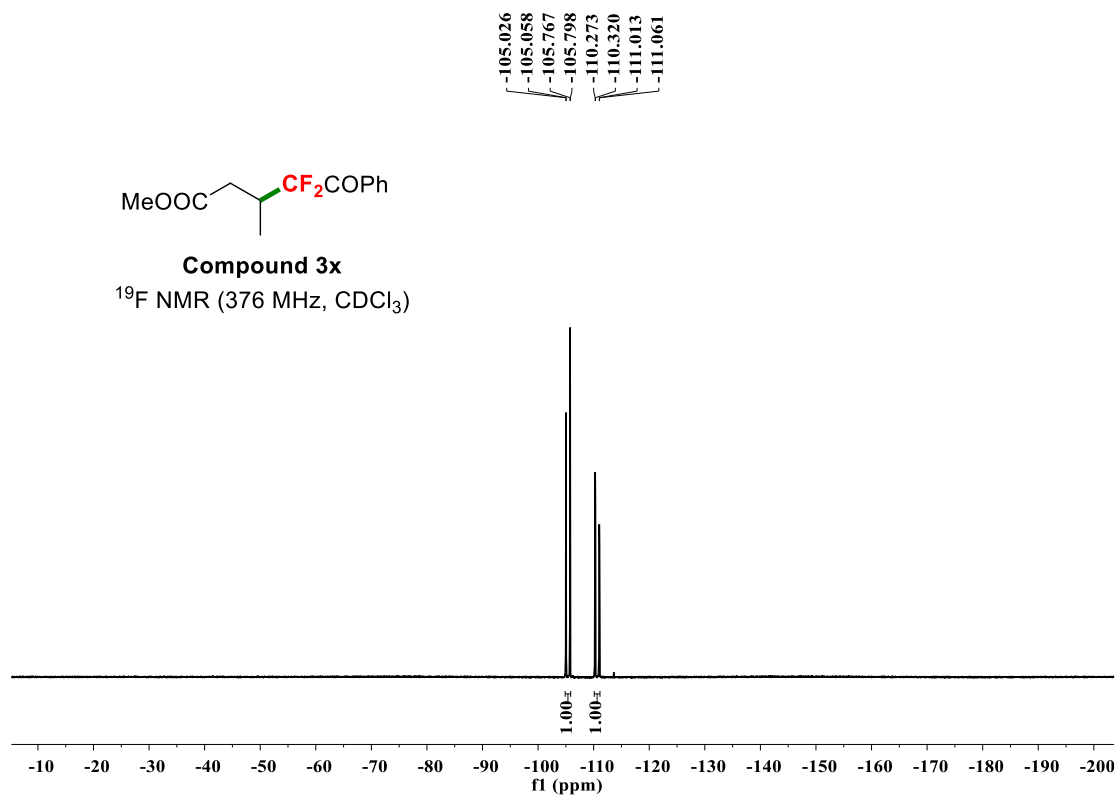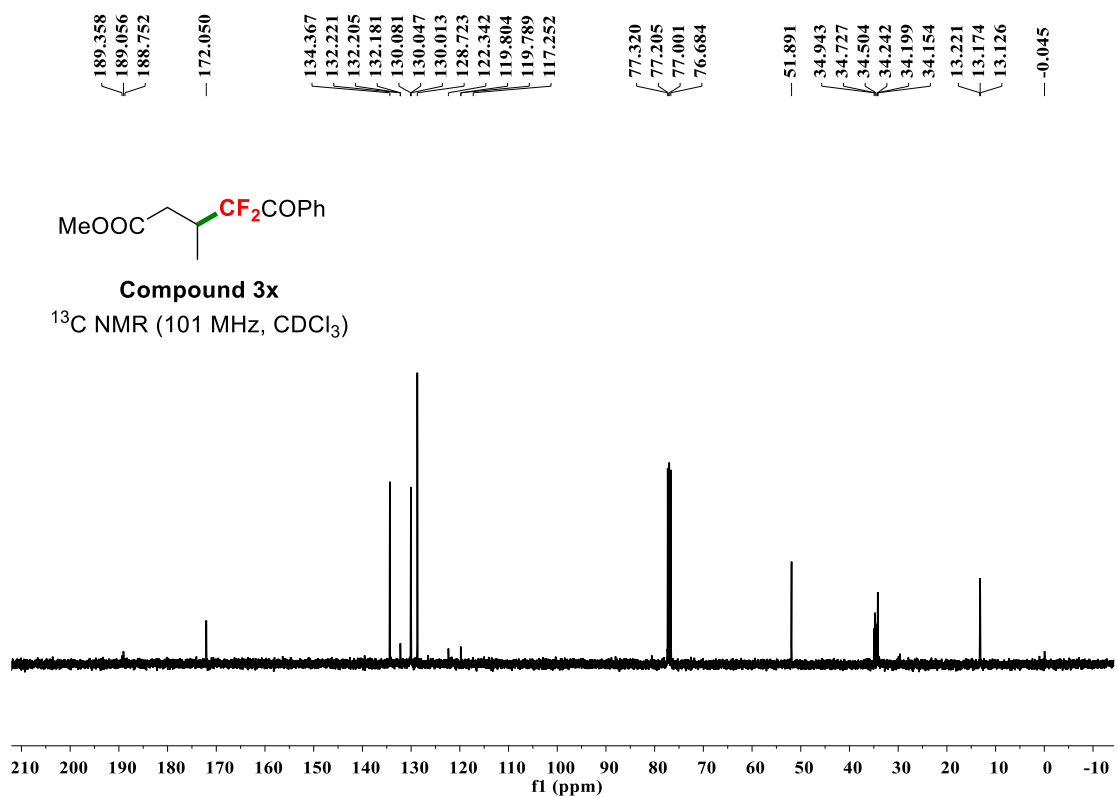



**Methyl-3,3-difluoro-2-methyl-4-oxo-4-phenylbutanoate (3y).**

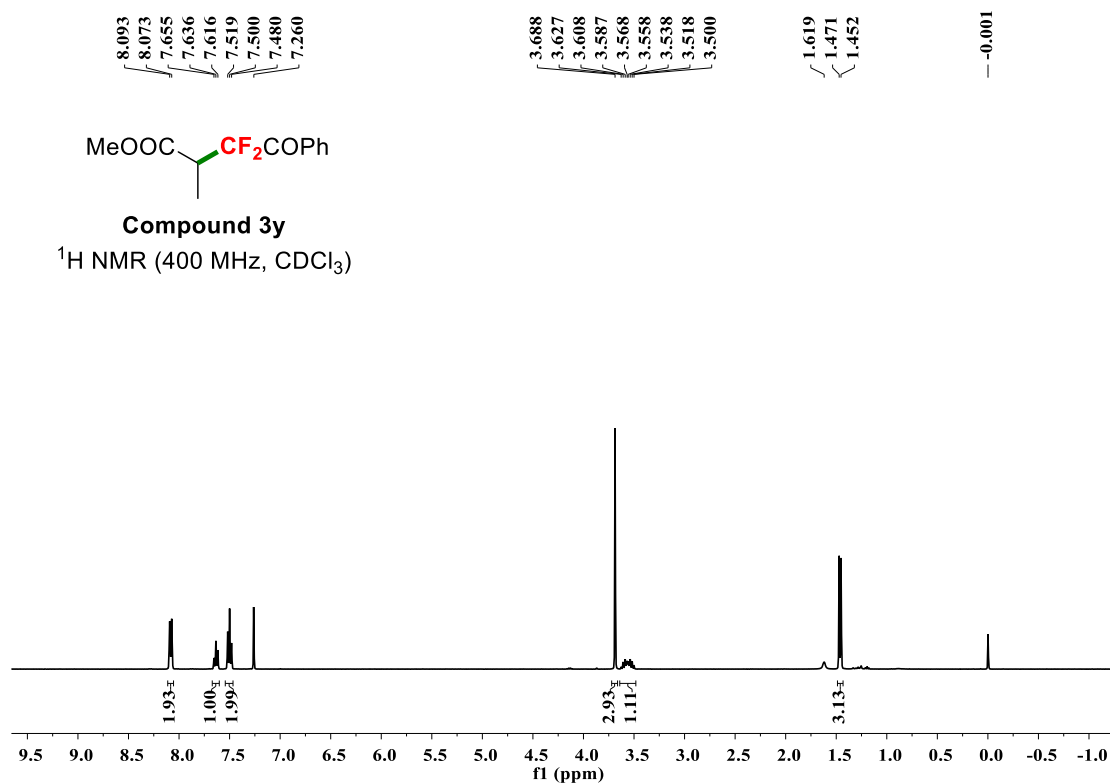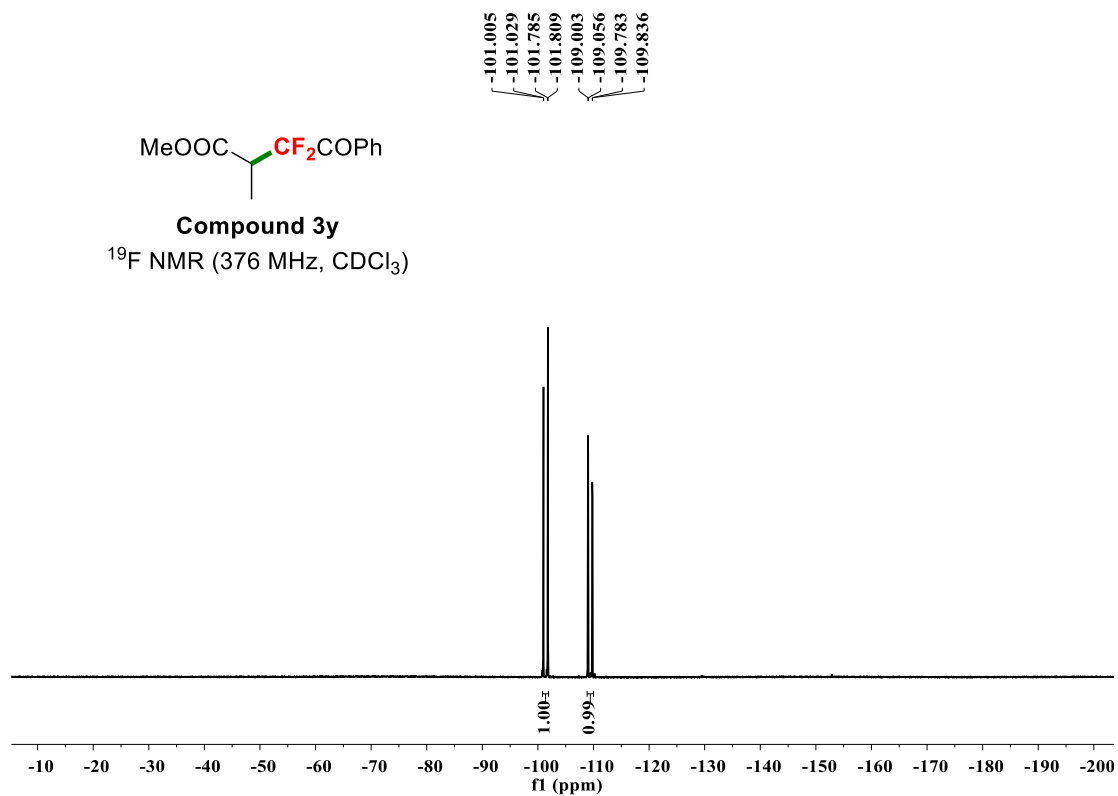

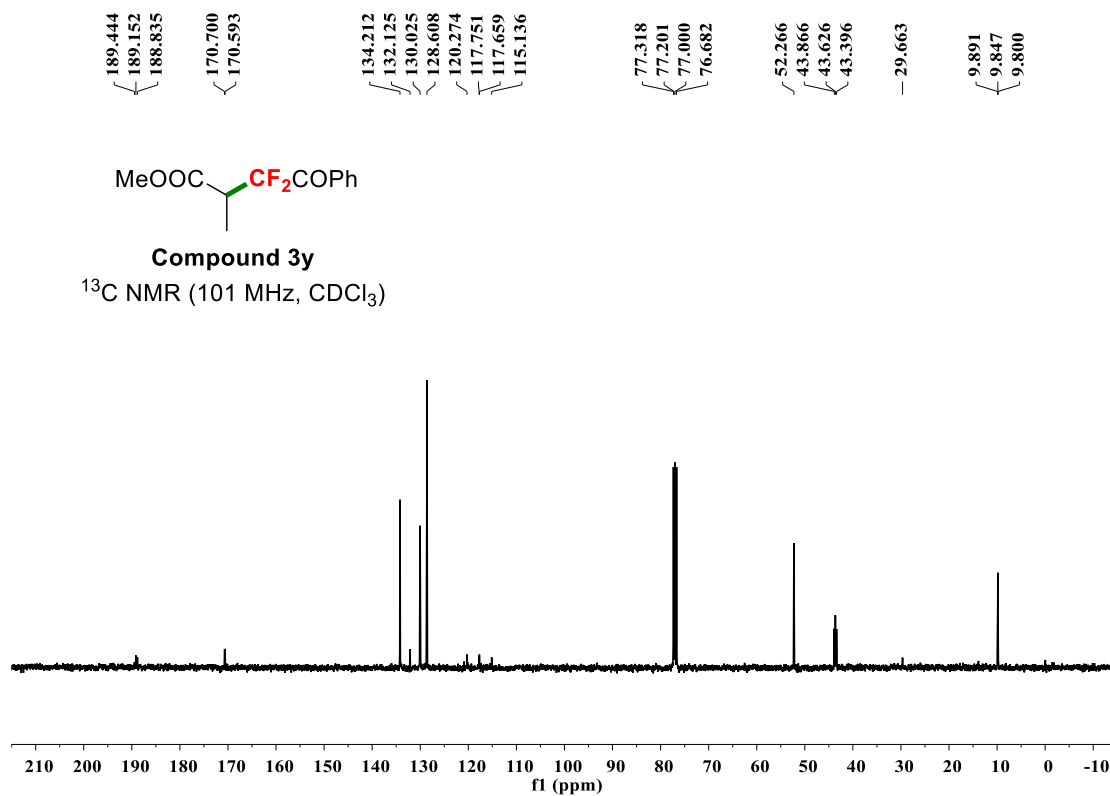

**Methyl-2-(cyclohexylmethyl)-3,3-difluoro-4-oxo-4-phenylbutanoate (3z).**

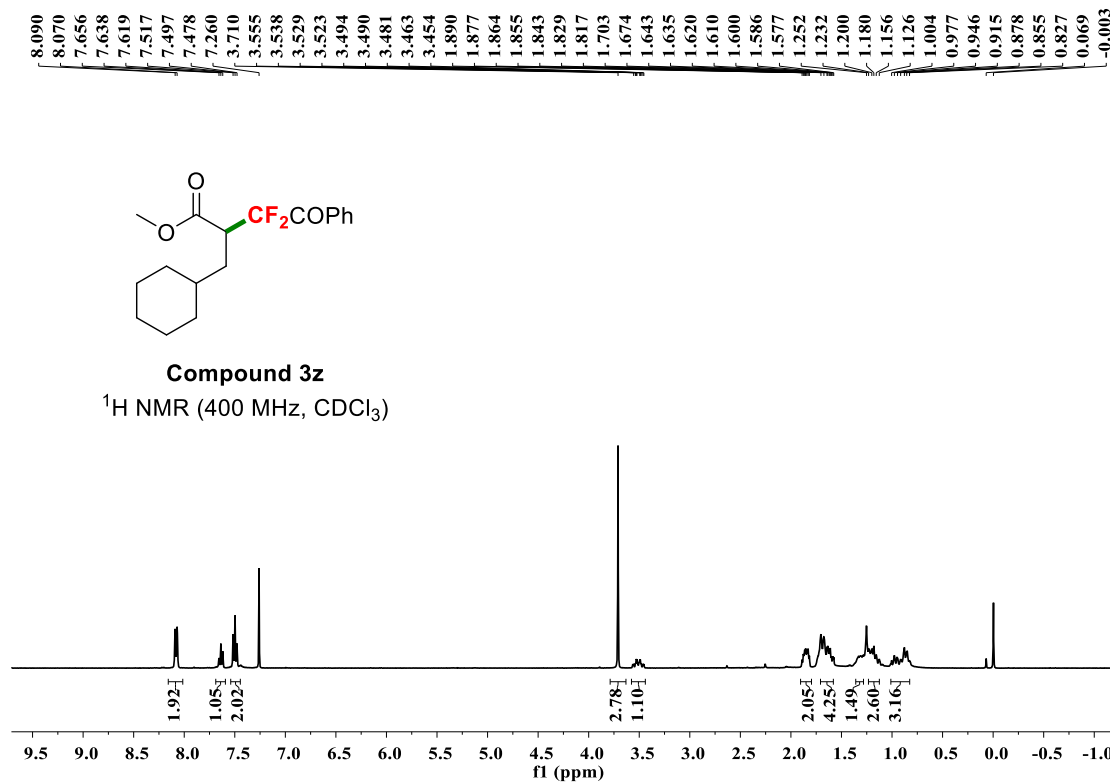

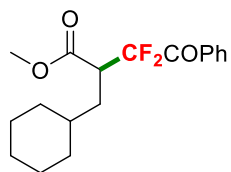

**Compound 3z**

$^1\text{H}$  NMR (400 MHz,  $\text{CDCl}_3$ )

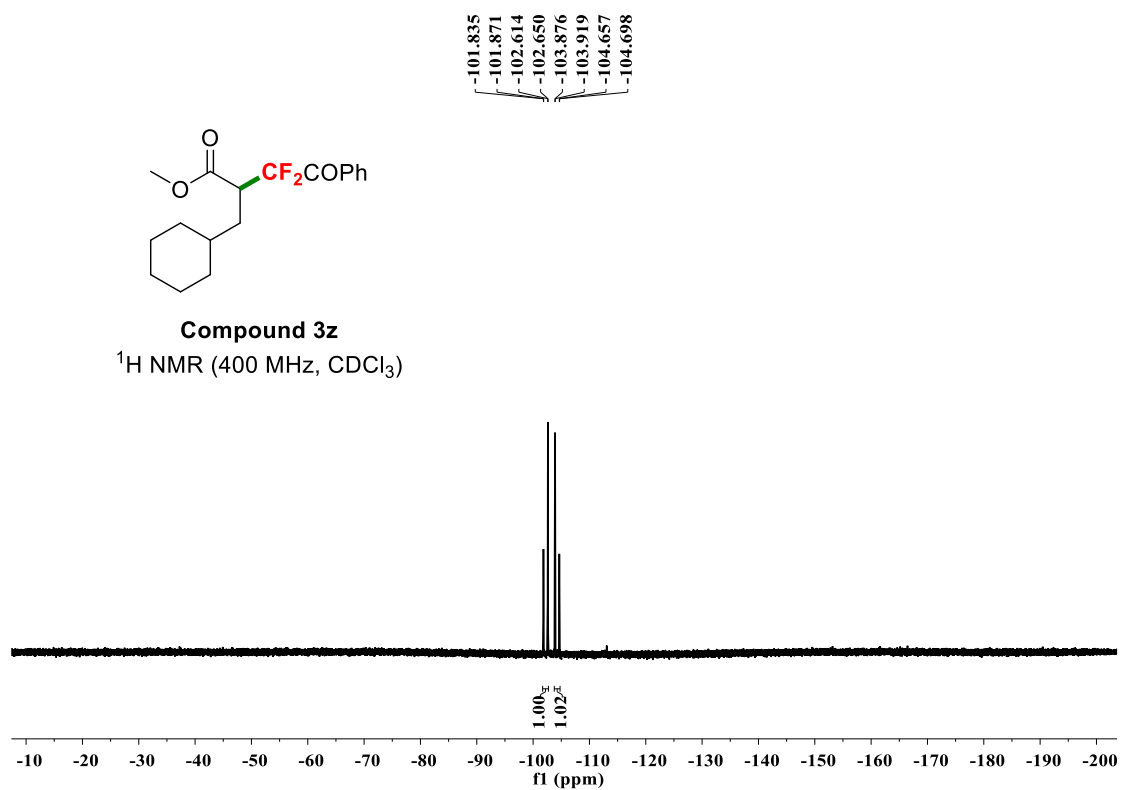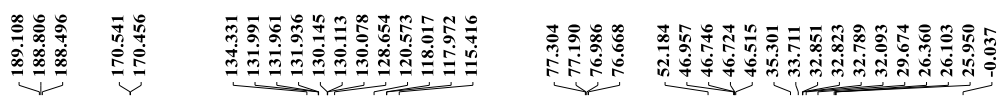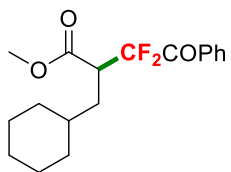

**Compound 3z**

$^{13}\text{C}$  NMR (101 MHz,  $\text{CDCl}_3$ )

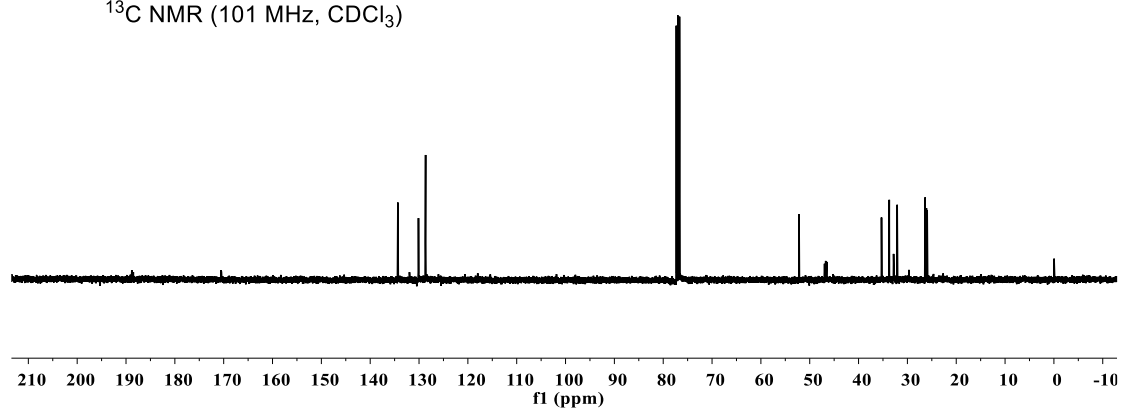

**Methyl-2-(1,1-difluoro-2-oxo-2-phenylethyl)hexanoate (3aa).**

8.093, 8.073, 7.653, 7.634, 7.616, 7.514, 7.494, 7.475, 7.260, 3.709, 3.440, 3.429, 3.415, 3.407, 3.397, 3.385, 3.373, 3.364, 3.354, 3.341, 3.330, 1.929, 1.919, 1.907, 1.896, 1.883, 1.872, 1.859, 1.846, 1.838, 1.824, 1.800, 1.789, 1.428, 1.411, 1.396, 1.384, 1.379, 1.360, 1.345, 1.328, 0.929, 0.912, 0.895, 0.070, -0.005

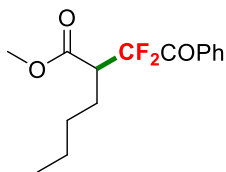

**Compound 3aa**

<sup>1</sup>H NMR (400 MHz, CDCl<sub>3</sub>)

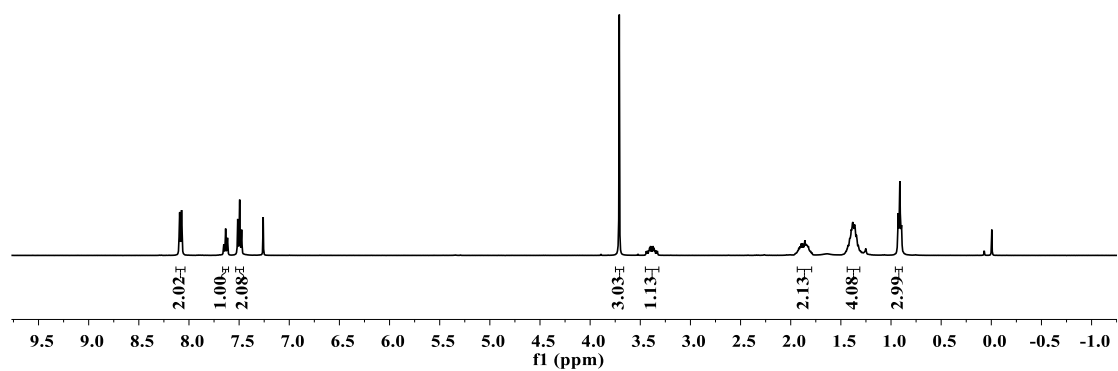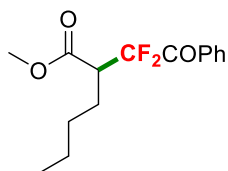

**Compound 3aa**

<sup>19</sup>F NMR (376 MHz, CDCl<sub>3</sub>)

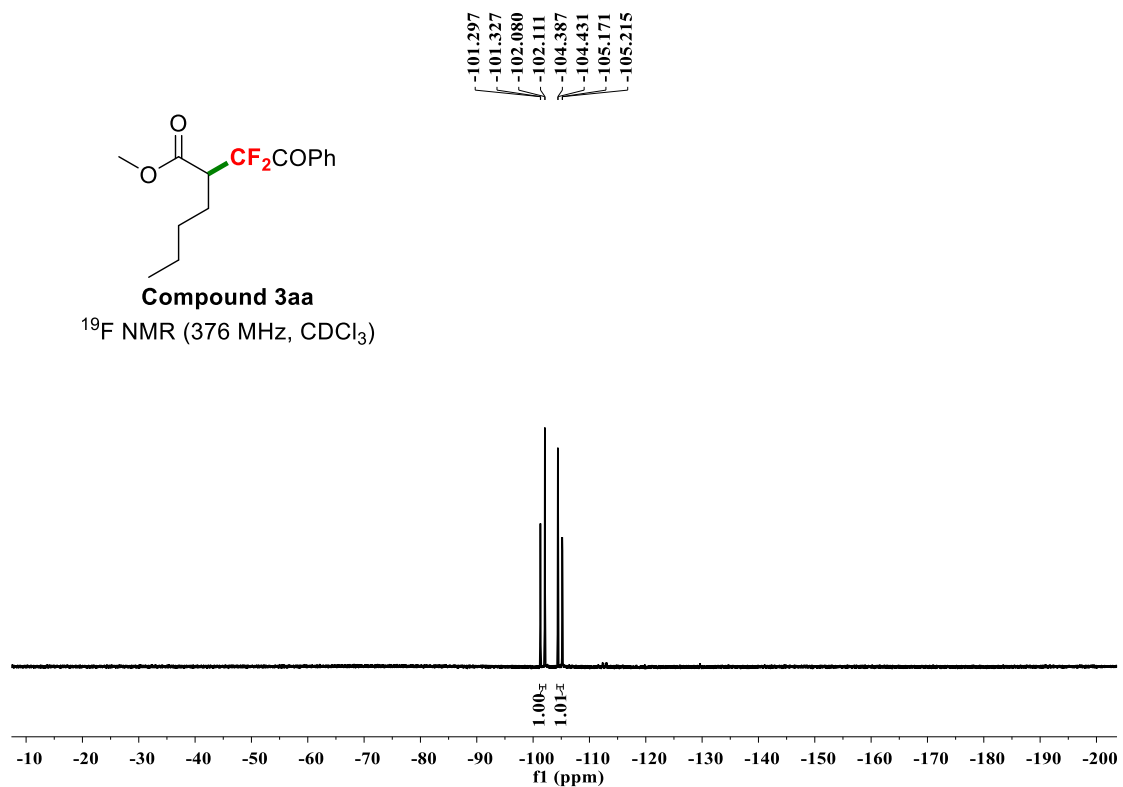

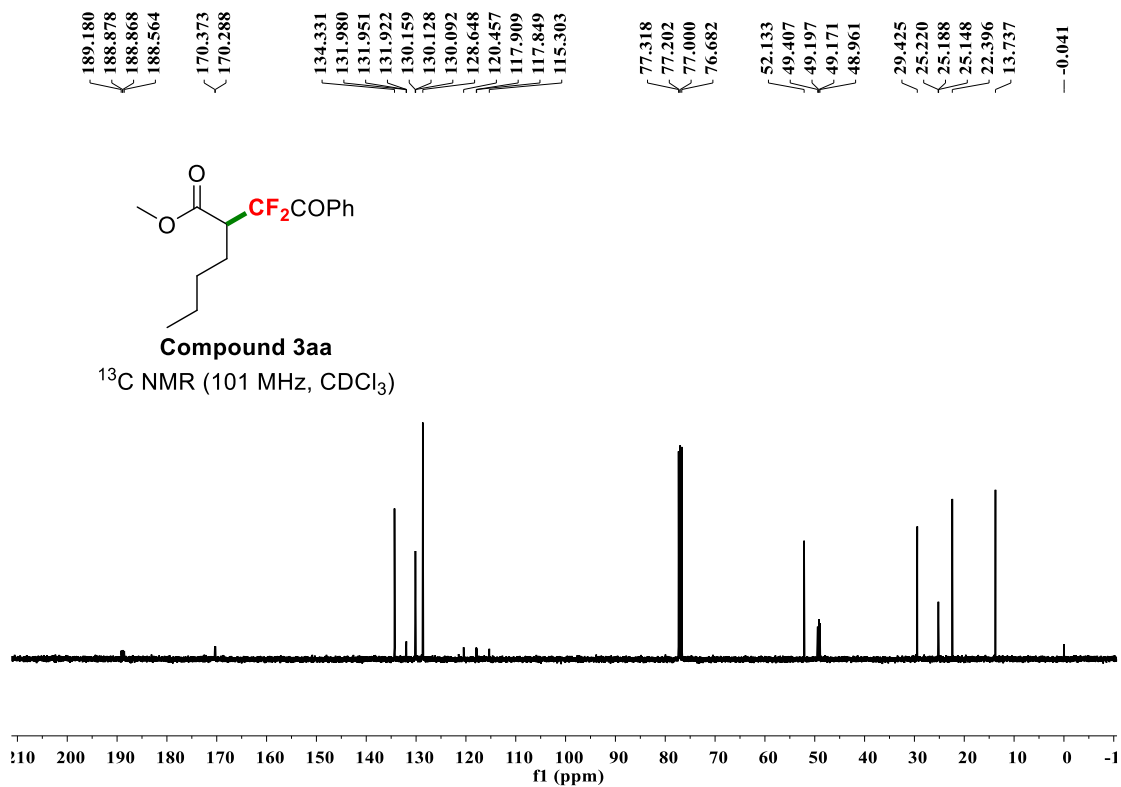

**Methyl 3,3-difluoro-2-(2-(methylthio)ethyl)-4-oxo-4-phenylbutanoate (3ab).**

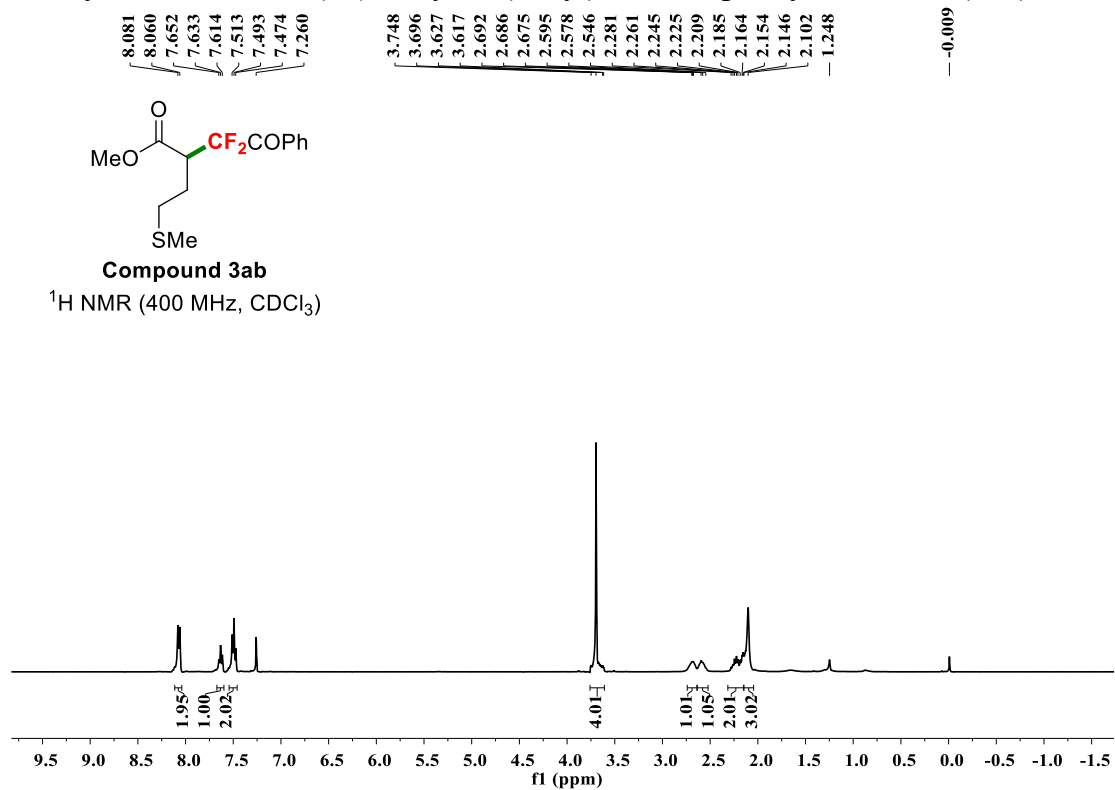

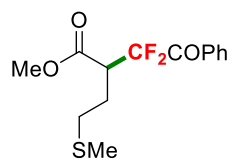

**Compound 3ab**

<sup>19</sup>F NMR (376 MHz, CDCl<sub>3</sub>)

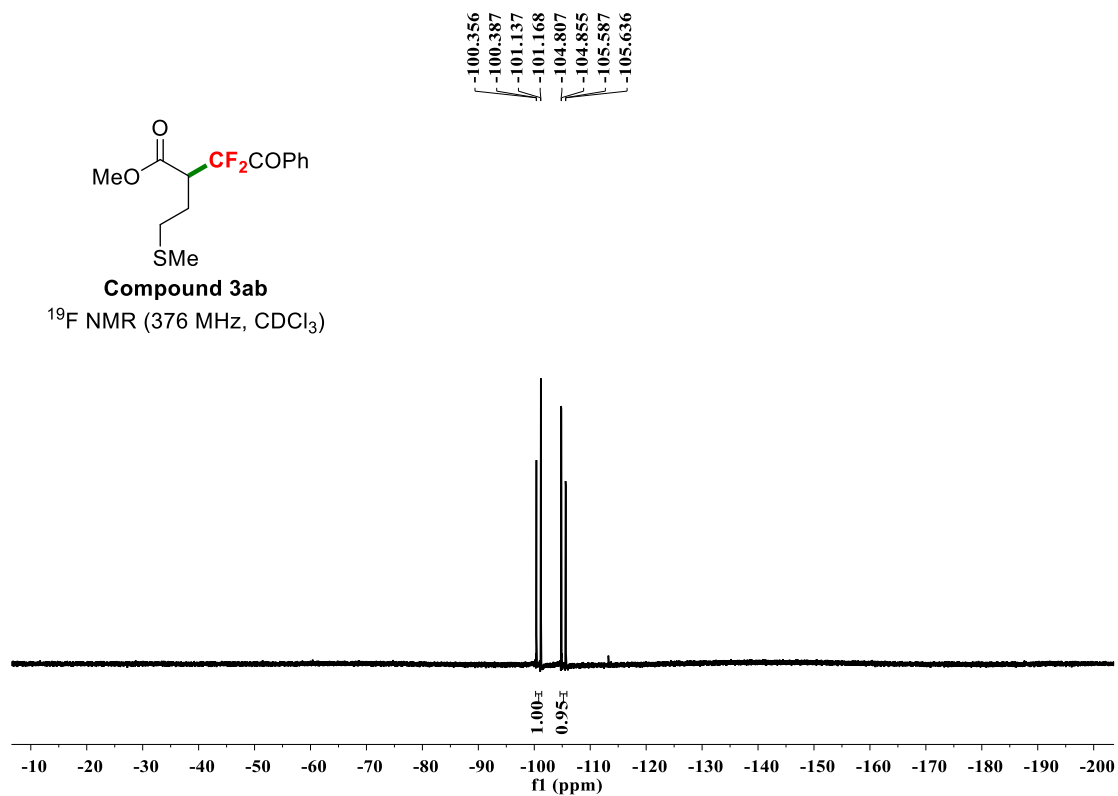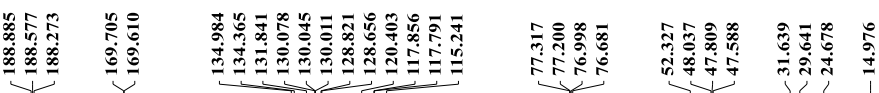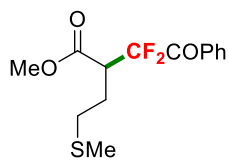

**Compound 3ab**

<sup>13</sup>C NMR (101 MHz, CDCl<sub>3</sub>)

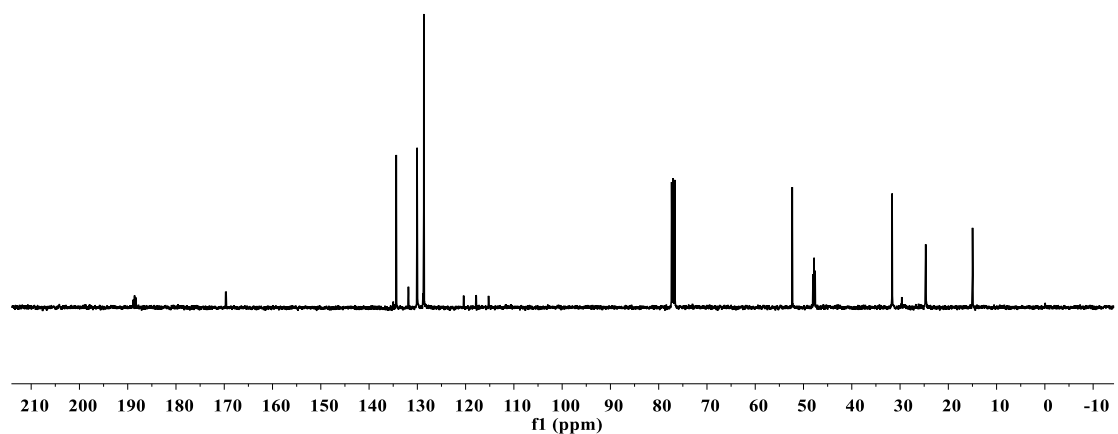

### Dimethyl 2-(1,1-difluoro-2-oxo-2-phenylethyl)pentanedioate (3ac).

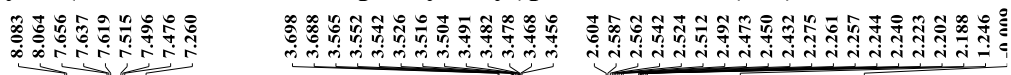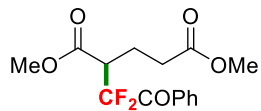

**Compound 3ac**

<sup>1</sup>H NMR (400 MHz, CDCl<sub>3</sub>)

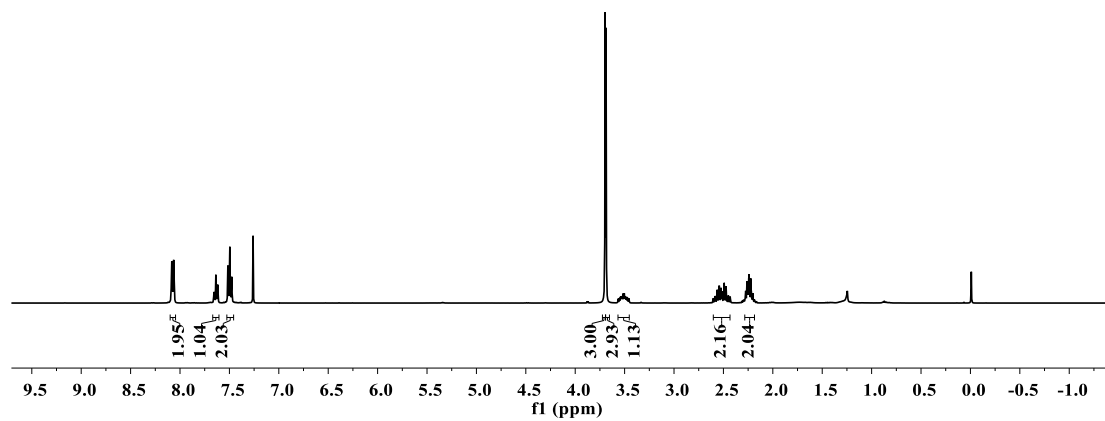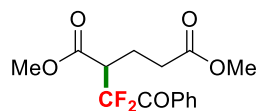

**Compound 3ac**

<sup>19</sup>F NMR (376 MHz, CDCl<sub>3</sub>)

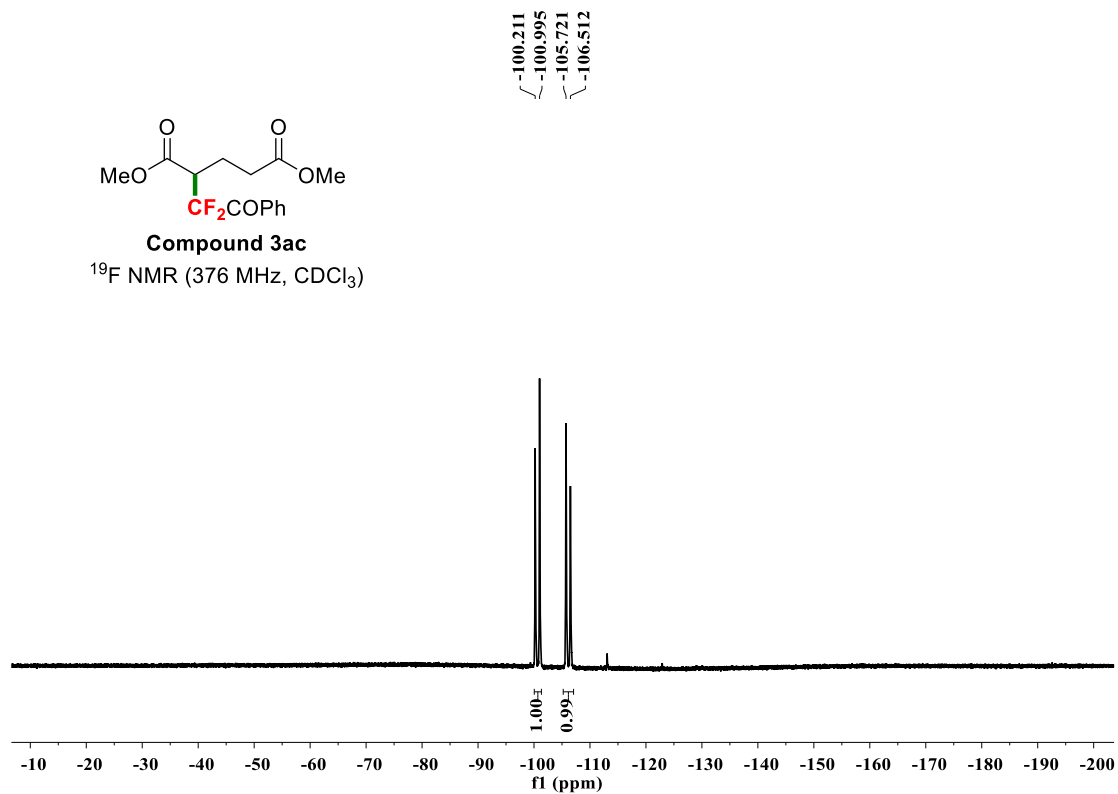

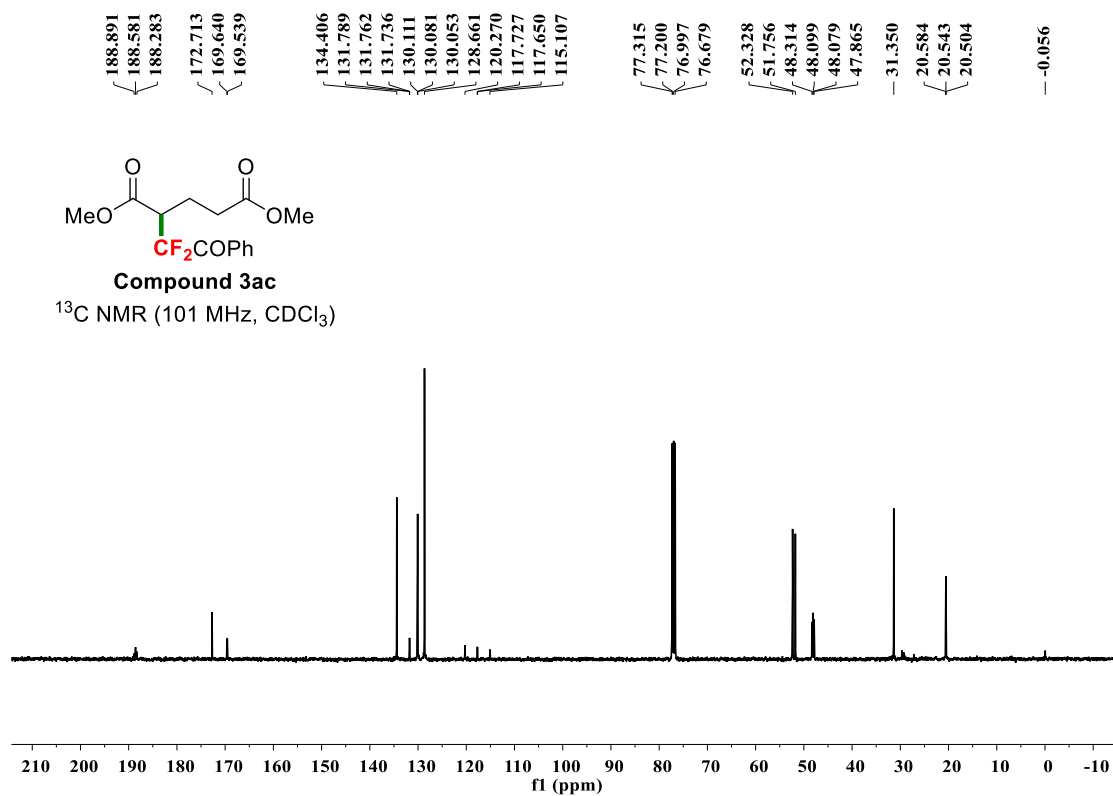

**Dimethyl 2-(1,1-difluoro-2-oxo-2-phenylethyl)succinate (3ad).**

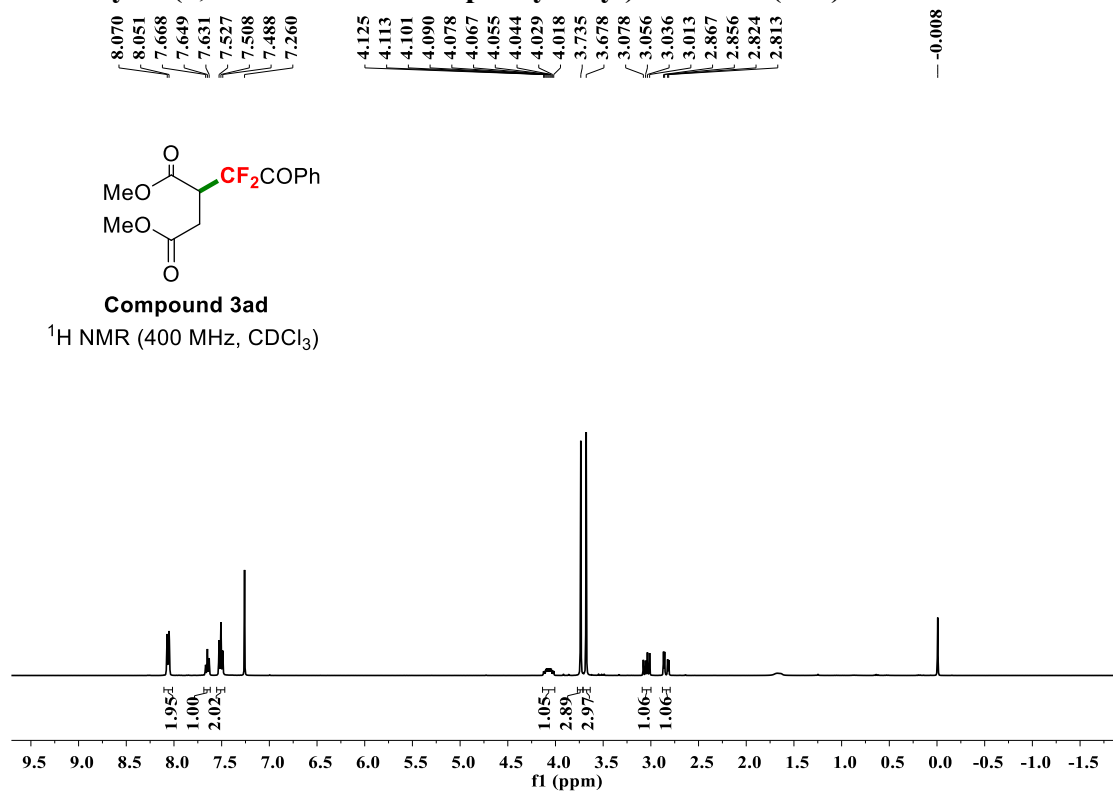



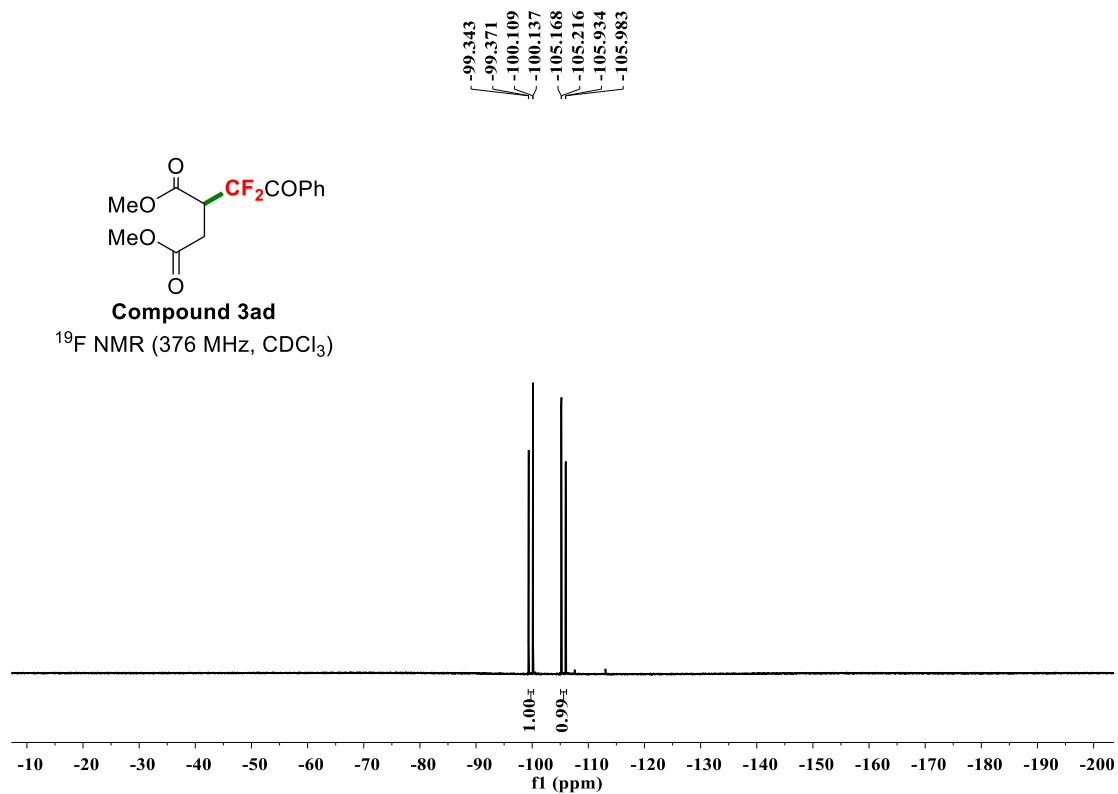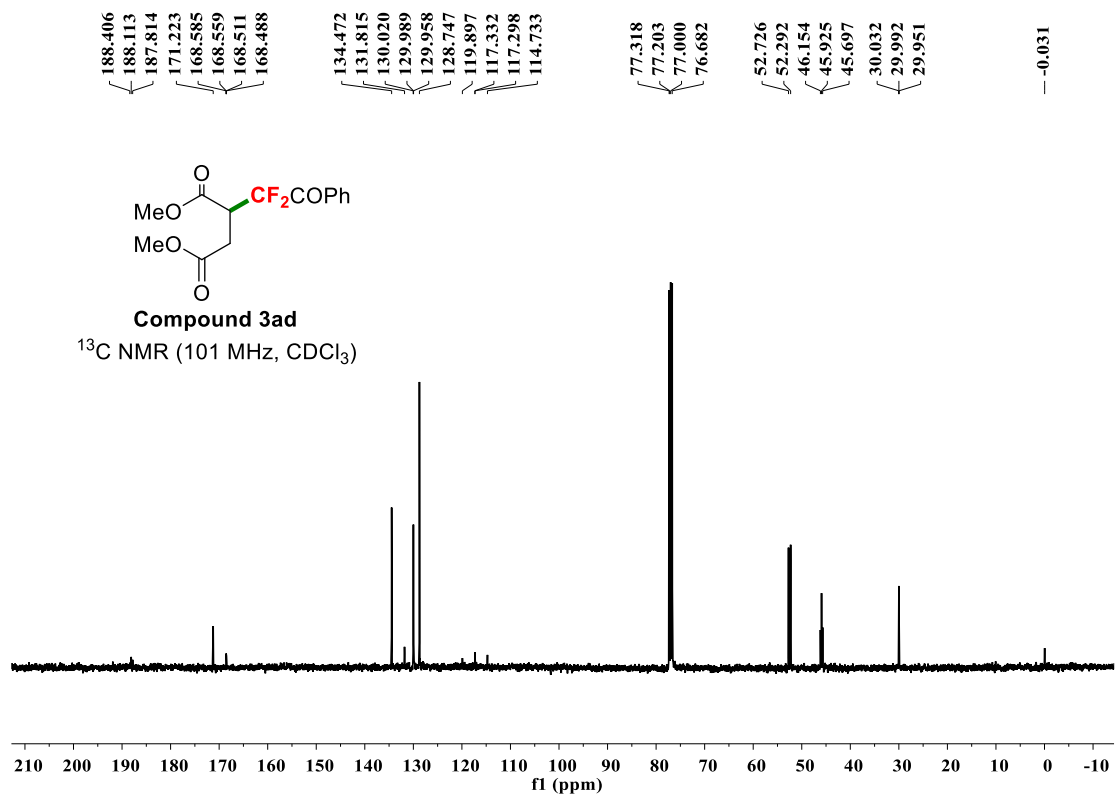

**Methyl 6-((tert-butoxycarbonyl)amino)-2-(1,1-difluoro-2-oxo-2-phenylethyl)-hexanoate (3ae).**

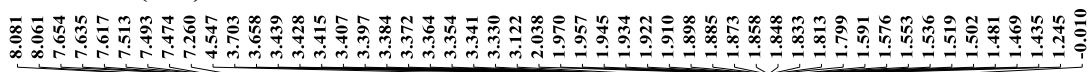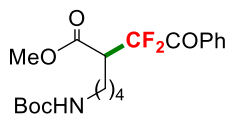

**Compound 3ae**

<sup>1</sup>H NMR (400 MHz, CDCl<sub>3</sub>)

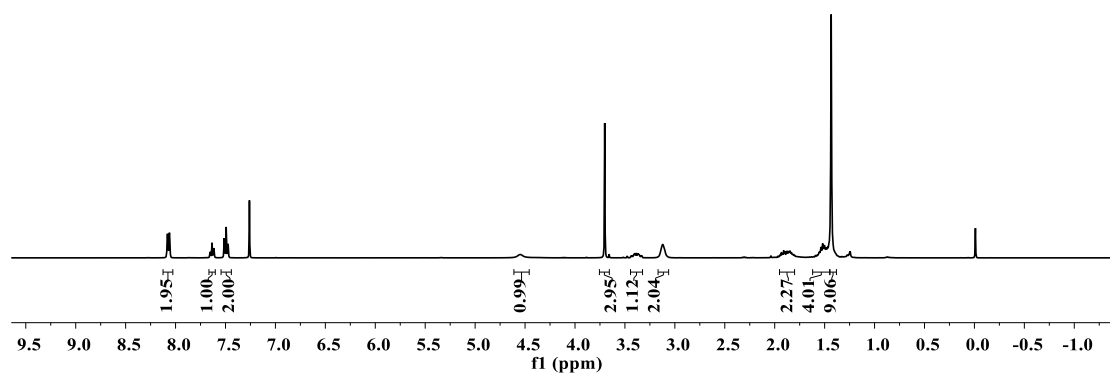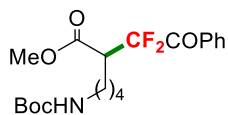

**Compound 3ae**

<sup>19</sup>F NMR (376 MHz, CDCl<sub>3</sub>)

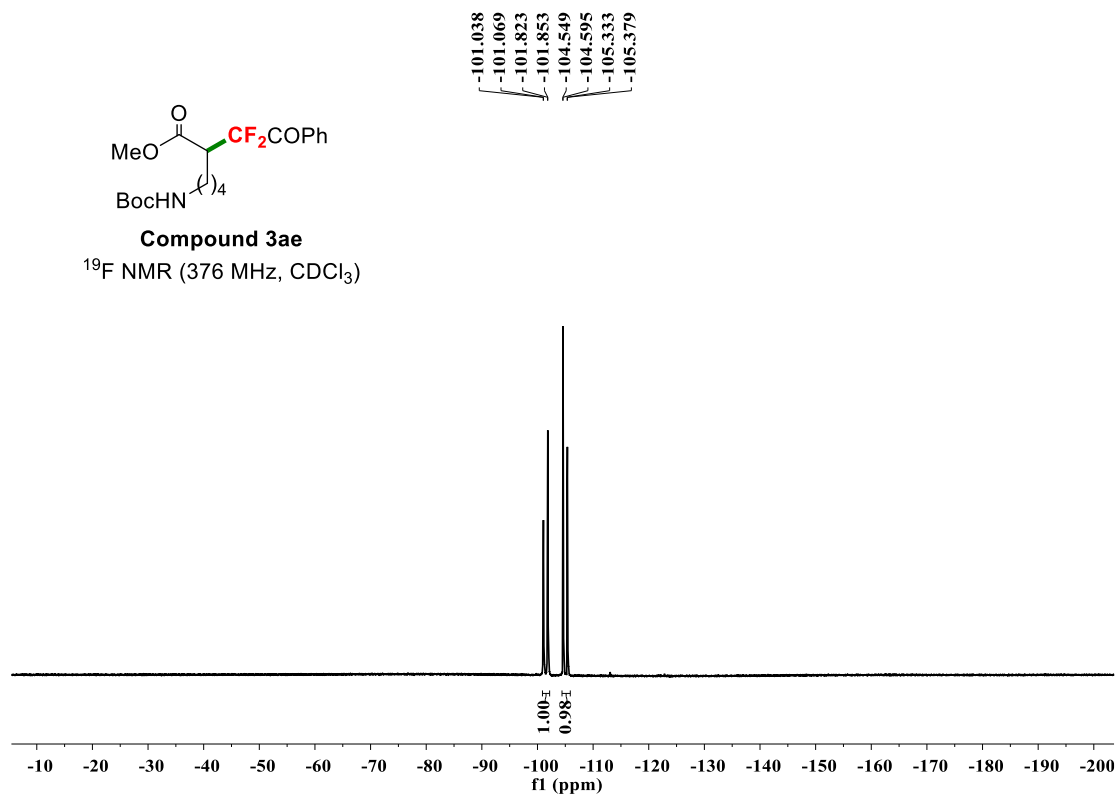

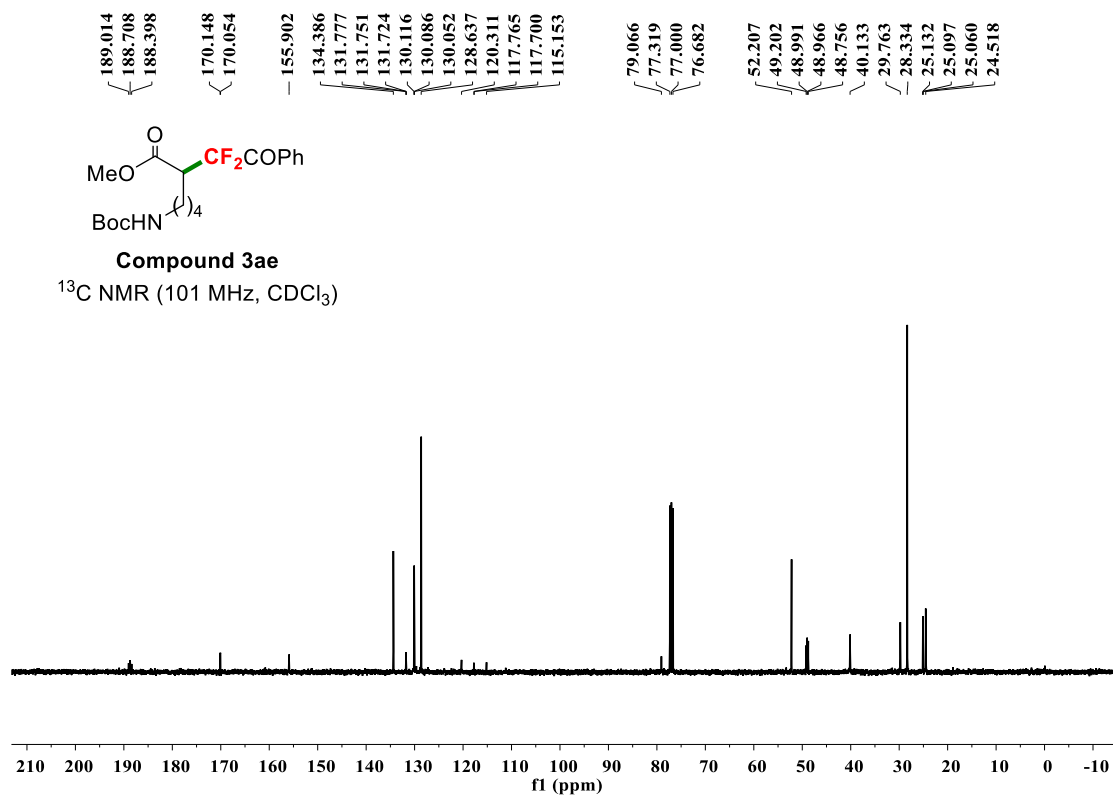

**Methyl 2-benzyl-3,3-difluoro-4-oxo-4-phenylbutanoate (3af).**

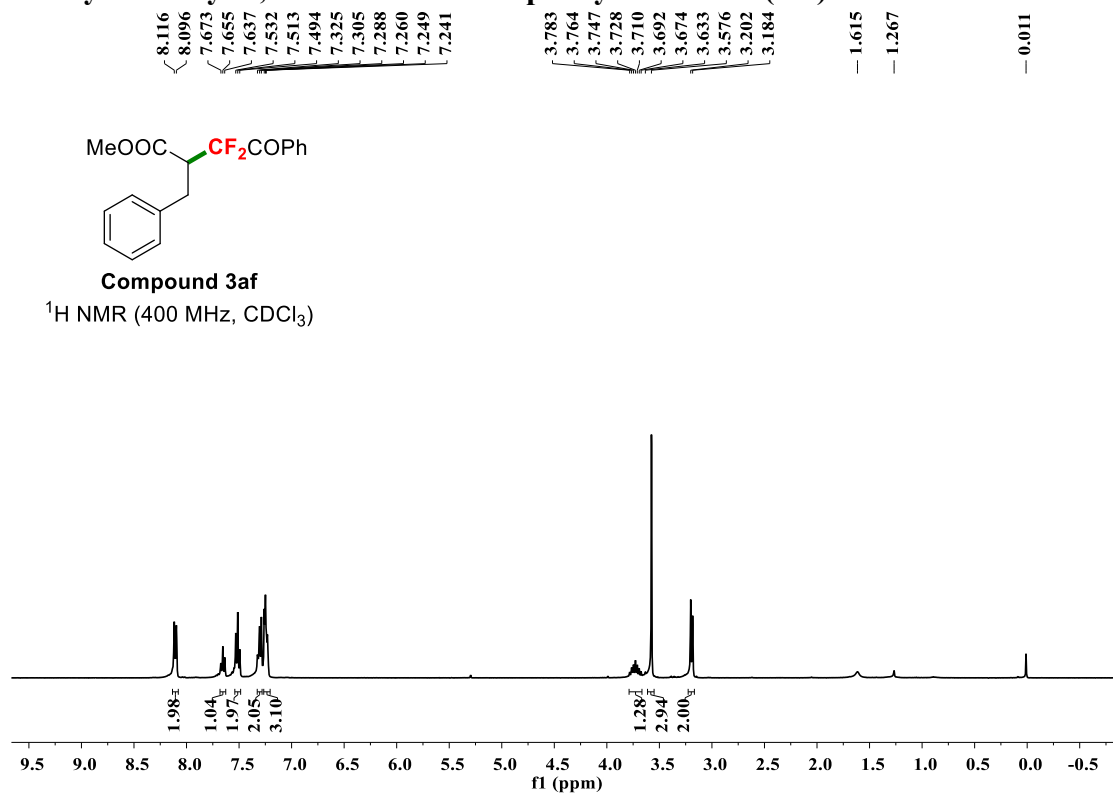

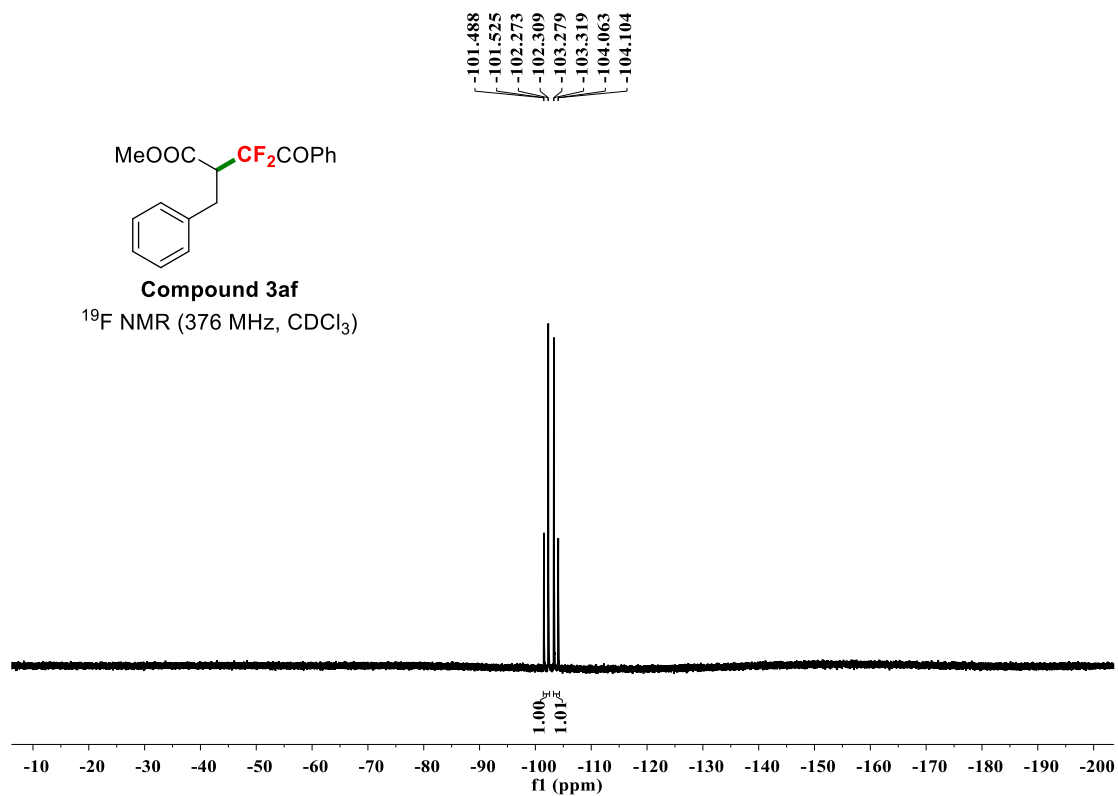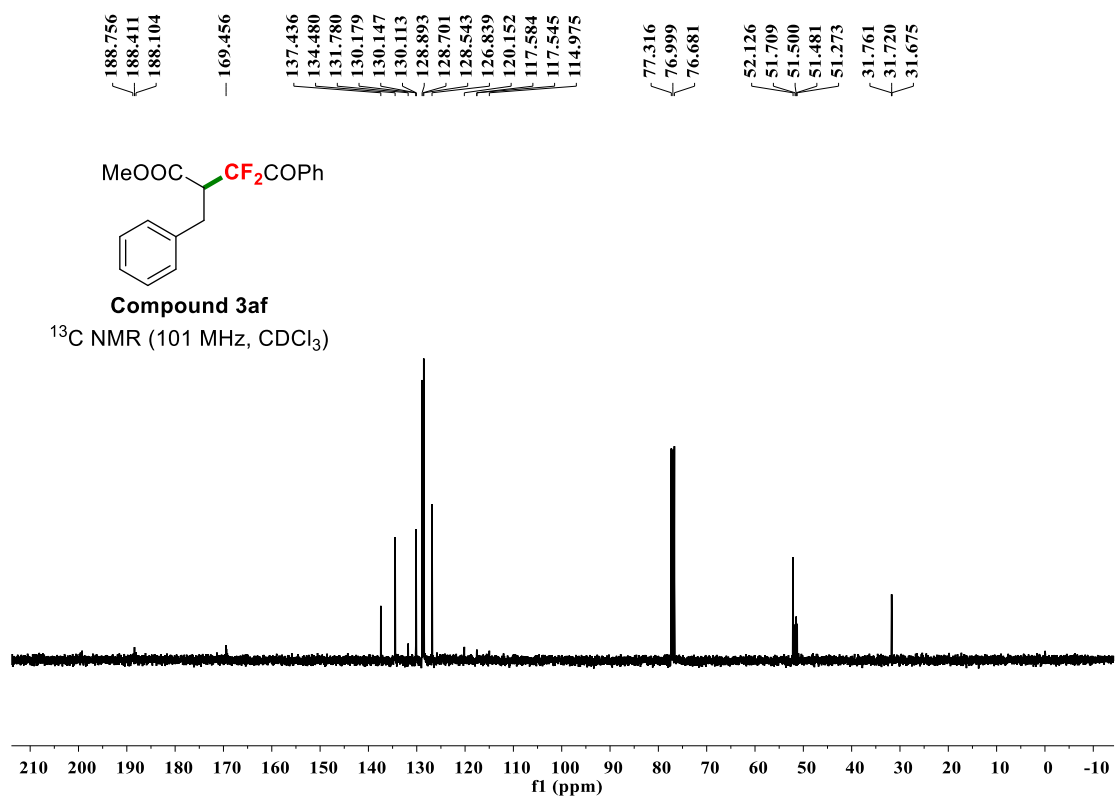

**Methyl 3,3-difluoro-2-(4-fluorobenzyl)-4-oxo-4-phenylbutanoate (3ag).**

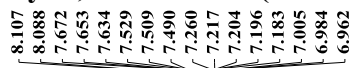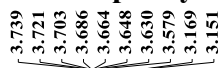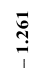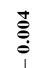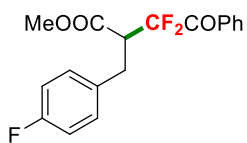

**Compound 3ag**

<sup>1</sup>H NMR (400 MHz, CDCl<sub>3</sub>)

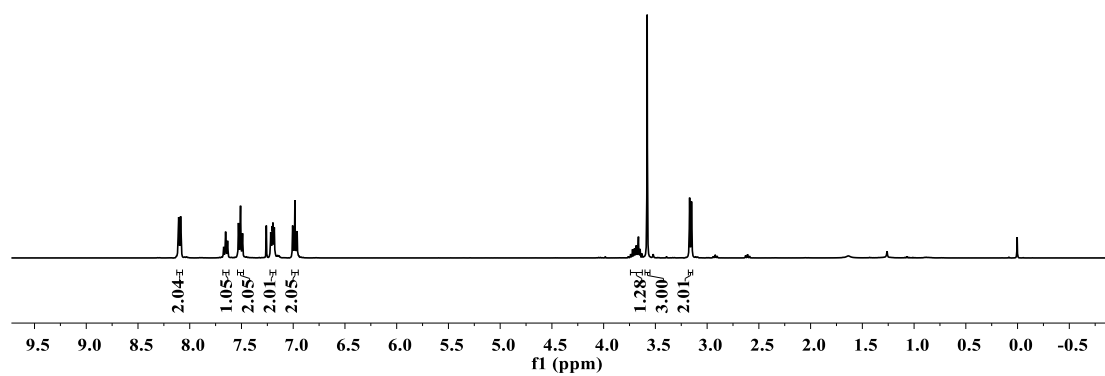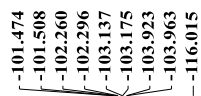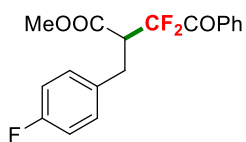

**Compound 3ag**

<sup>19</sup>F NMR (376 MHz, CDCl<sub>3</sub>)

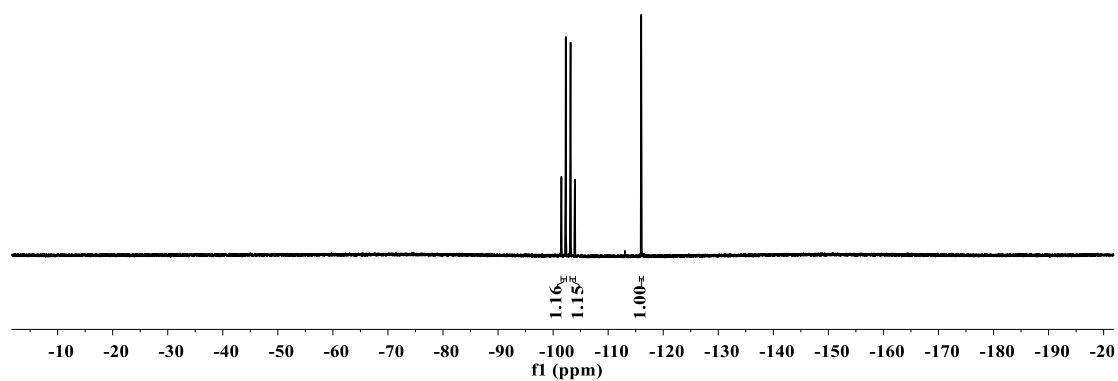

188.645  
188.341  
188.033  
169.336  
169.260  
163.033  
160.595  
134.551  
133.110  
133.079  
131.727  
131.694  
131.669  
130.491  
130.411  
130.180  
130.147  
130.113  
129.710  
129.630  
128.841  
128.725  
120.095  
117.524  
117.487  
115.498  
115.285  
115.119  
114.915  
77.317  
77.203  
77.000  
76.683  
52.170  
51.703  
51.604  
51.483  
51.264  
30.986  
30.942  
30.896  
30.079  
29.678  
0.993  
-0.048

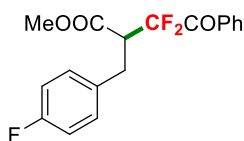

**Compound 3ag**

$^{13}\text{C}$  NMR (101 MHz,  $\text{CDCl}_3$ )

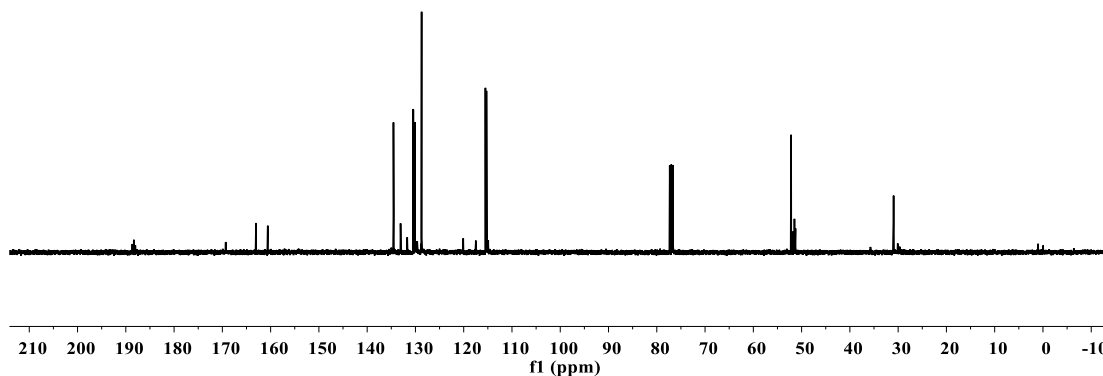

**Methyl 3,3-difluoro-2-(4-hydroxybenzyl)-4-oxo-4-phenylbutanoate (3ah).**

8.106  
8.087  
7.669  
7.650  
7.631  
7.524  
7.504  
7.485  
7.260  
7.080  
7.059  
6.755  
6.734  
5.663  
3.727  
3.712  
3.705  
3.691  
3.671  
3.654  
3.632  
3.617  
3.583  
3.120  
3.105  
3.098  
-1.259  
-0.005

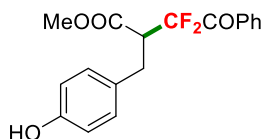

**Compound 3ah**

$^1\text{H}$  NMR (400 MHz,  $\text{CDCl}_3$ )

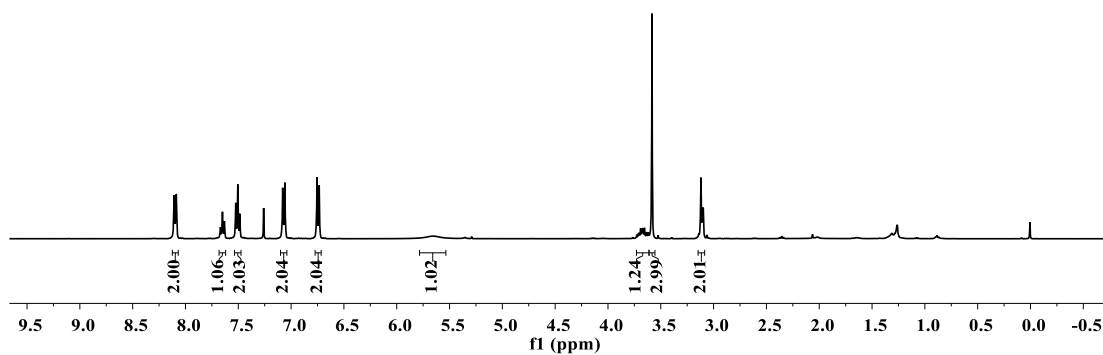

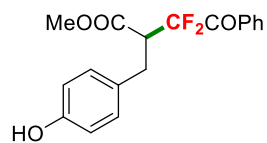

**Compound 3ah**

<sup>19</sup>F NMR (376 MHz, CDCl<sub>3</sub>)

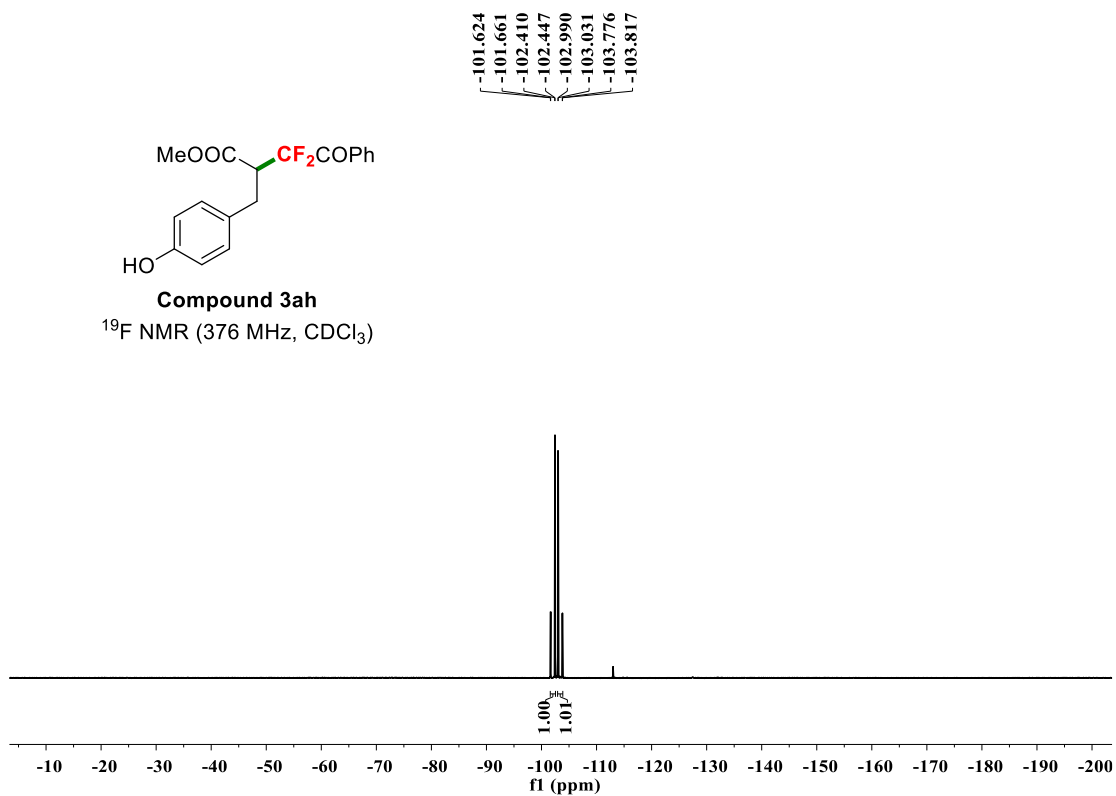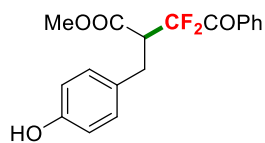

**Compound 3ah**

<sup>13</sup>C NMR (101 MHz, CDCl<sub>3</sub>)

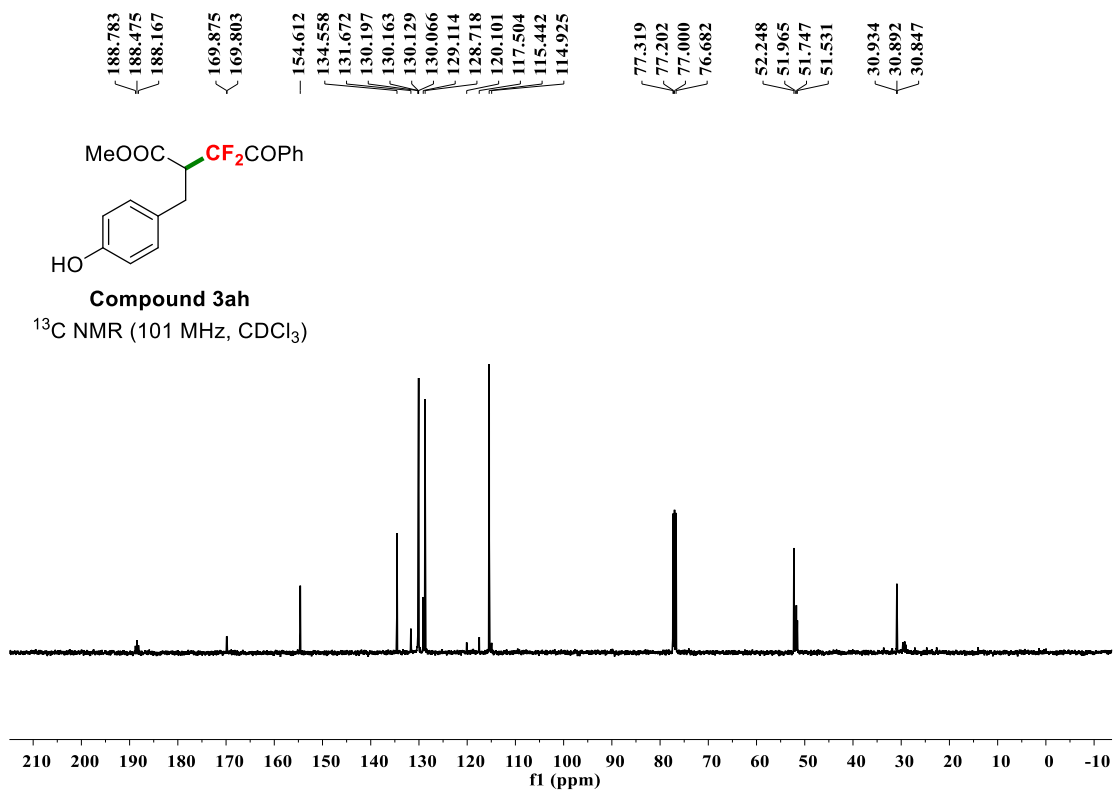

# Methyl -2-(4-(tert-butoxy)benzyl)-3,3-difluoro-4-oxo-4-phenylbutanoate (3ai).

8.107, 8.088, 7.661, 7.642, 7.624, 7.520, 7.500, 7.481, 7.260, 7.125, 7.104, 6.926, 6.905, 3.736, 3.720, 3.714, 3.699, 3.681, 3.664, 3.648, 3.641, 3.626, 3.543, 3.149, 3.134, 3.127, 1.326, 0.000

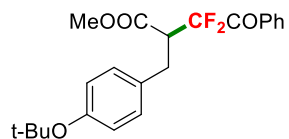

**Compound 3ai**

<sup>1</sup>H NMR (400 MHz, CDCl<sub>3</sub>)

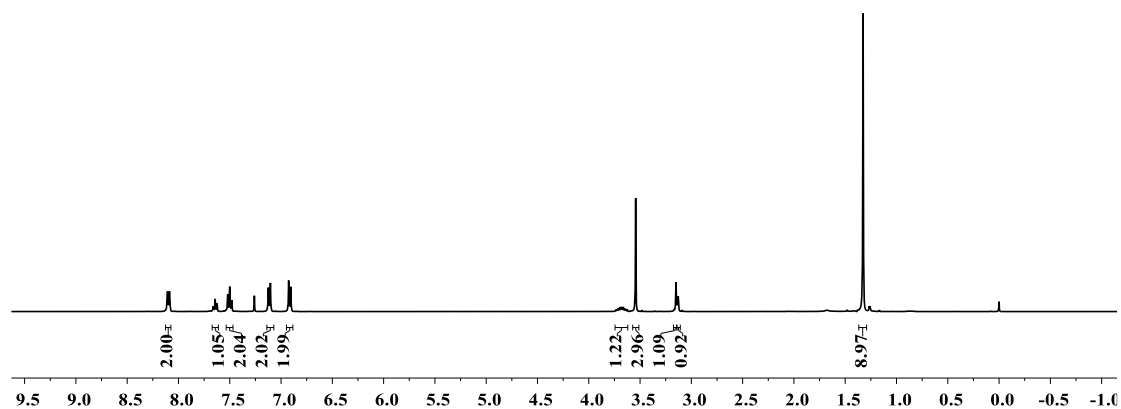

-101.584, -101.620, -102.370, -102.406, -103.303, -103.344, -104.088, -104.129

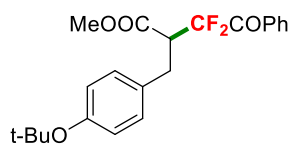

**Compound 3ai**

<sup>19</sup>F NMR (376 MHz, CDCl<sub>3</sub>)

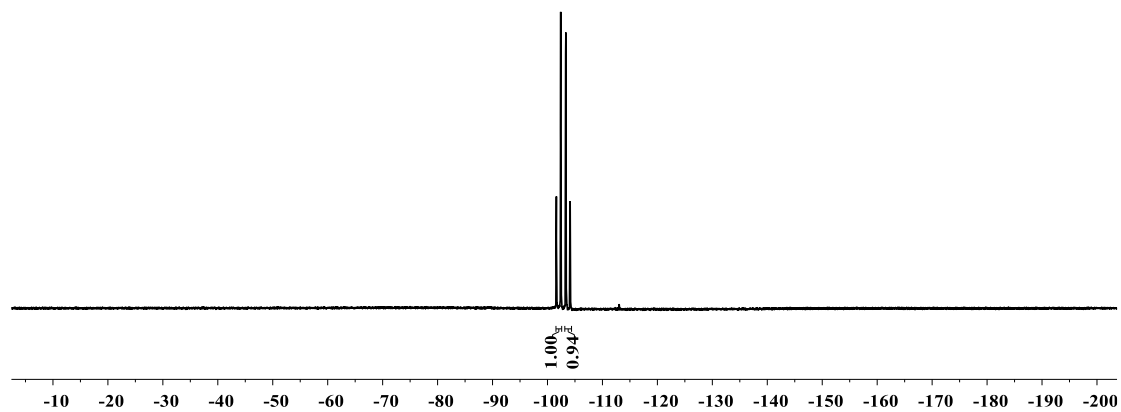



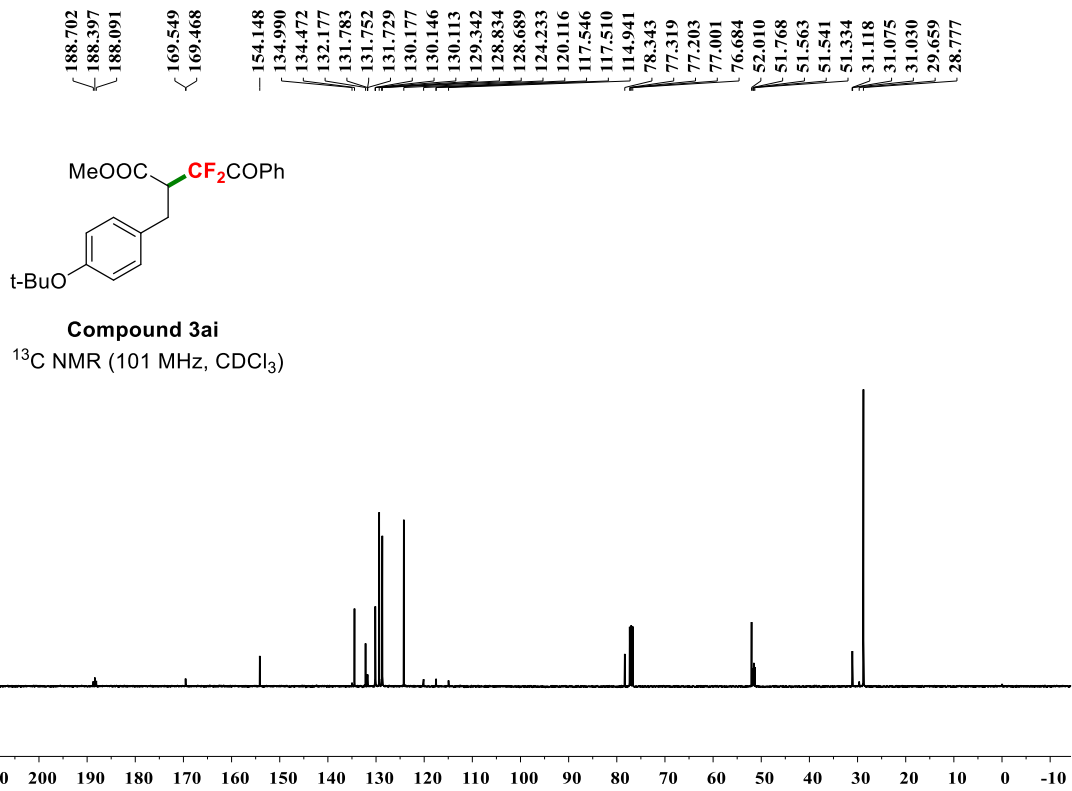

**Methyl-3,3-difluoro-2-(4-nitrobenzyl)-4-oxo-4-phenylbutanoate (3aj).**

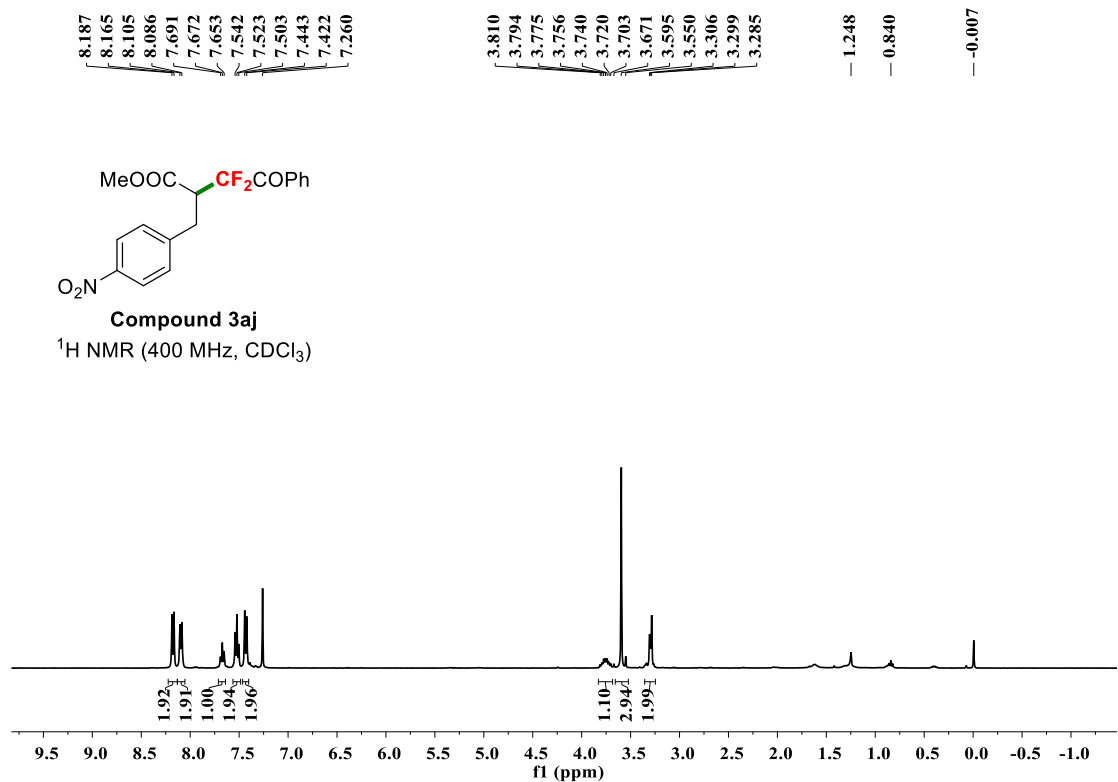

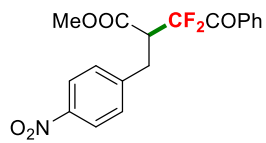

**Compound 3aj**

<sup>19</sup>F NMR (376 MHz, CDCl<sub>3</sub>)

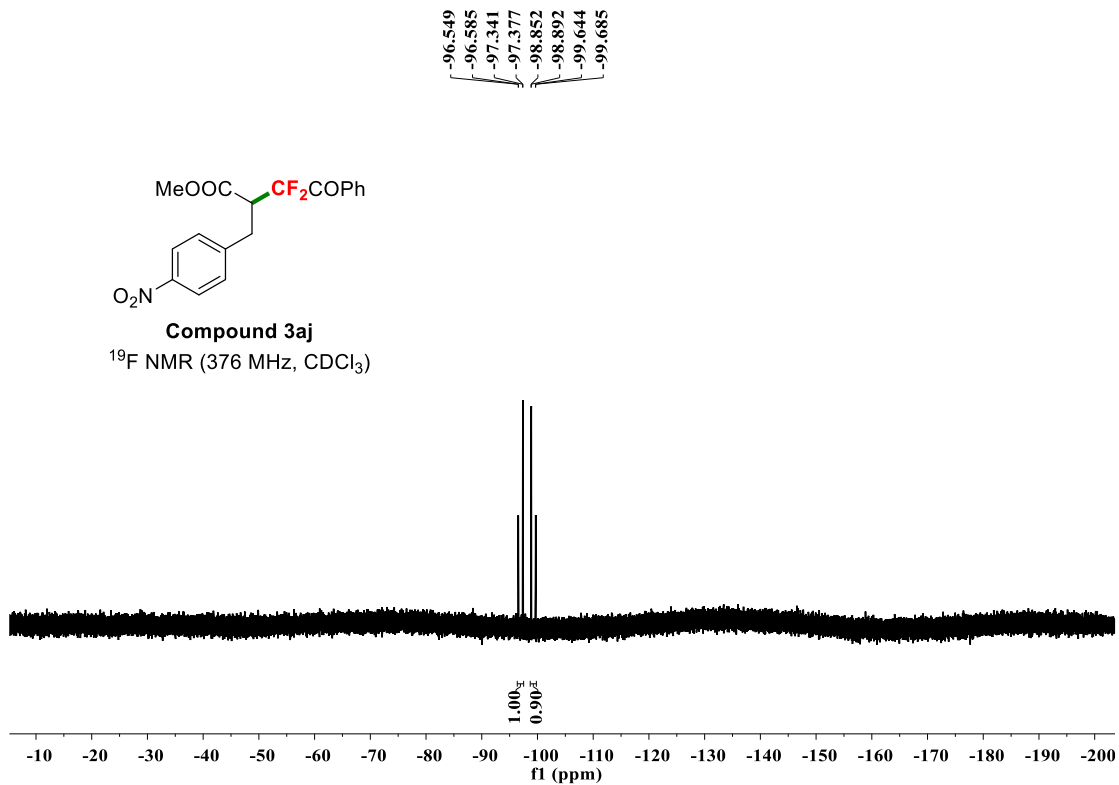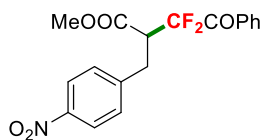

**Compound 3aj**

<sup>13</sup>C NMR (101 MHz, CDCl<sub>3</sub>)

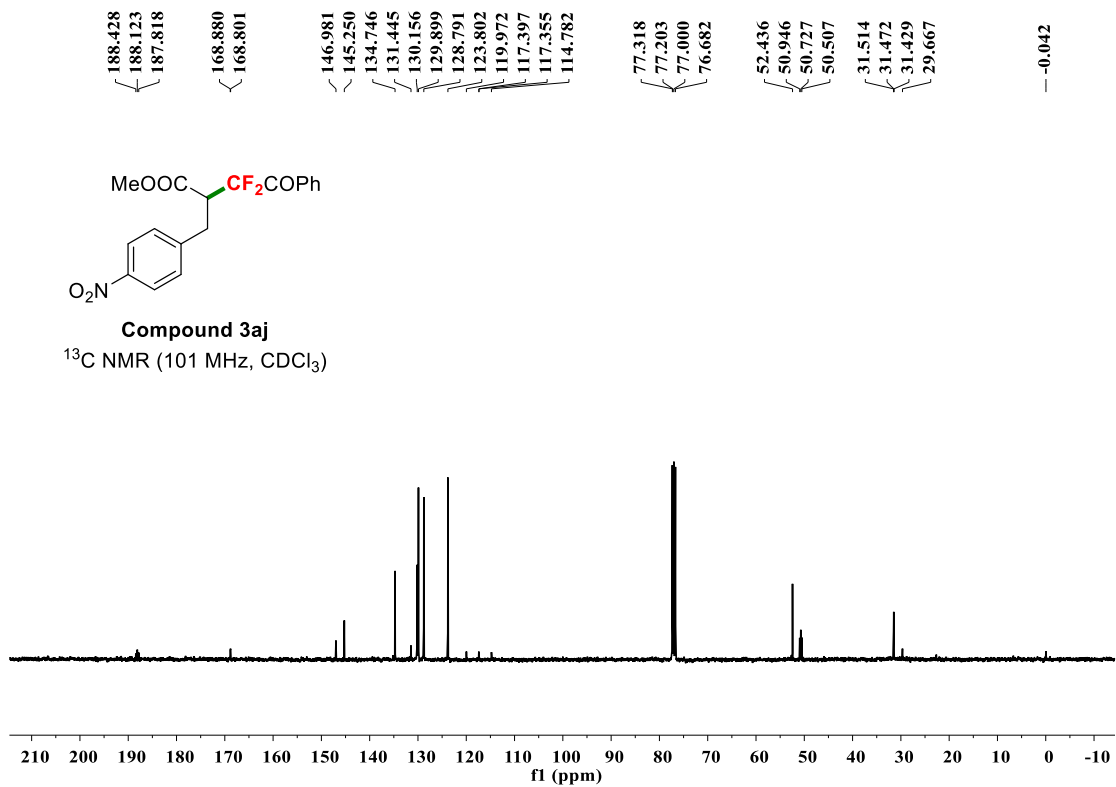

**Methyl-3,3-difluoro-2-(naphthalen-1-ylmethyl)-4-oxo-4-phenylbutanoate(3ak).**

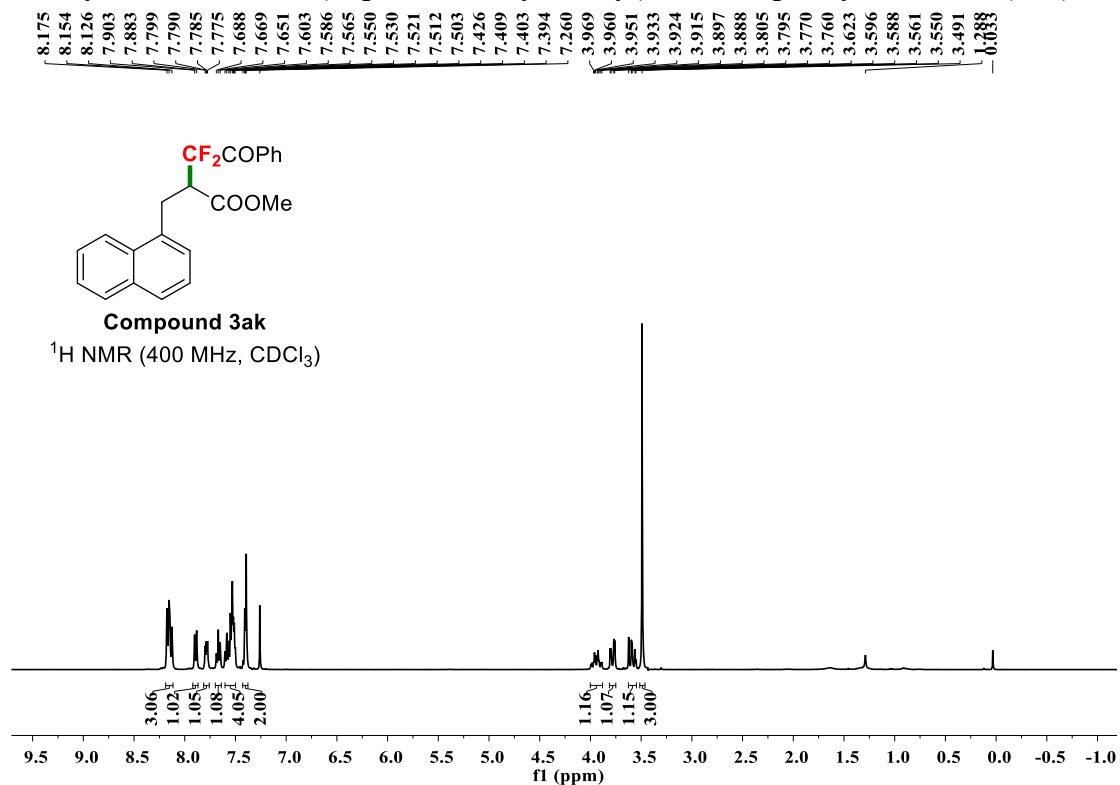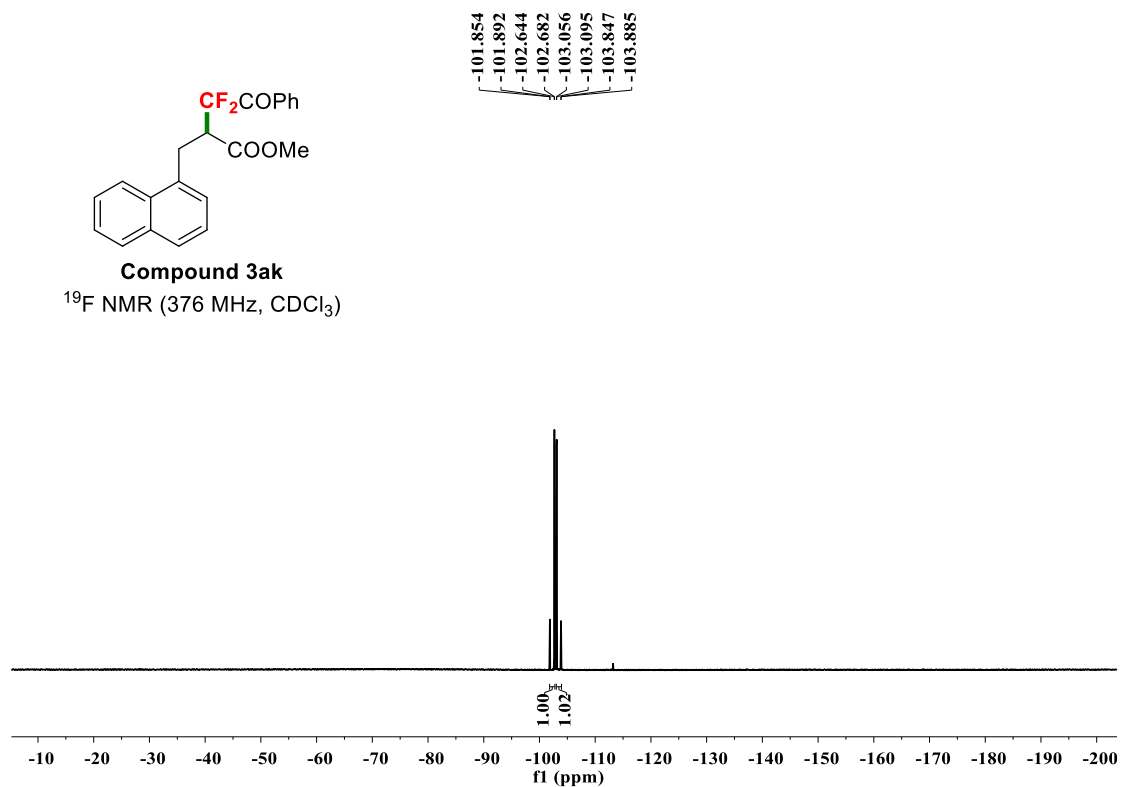

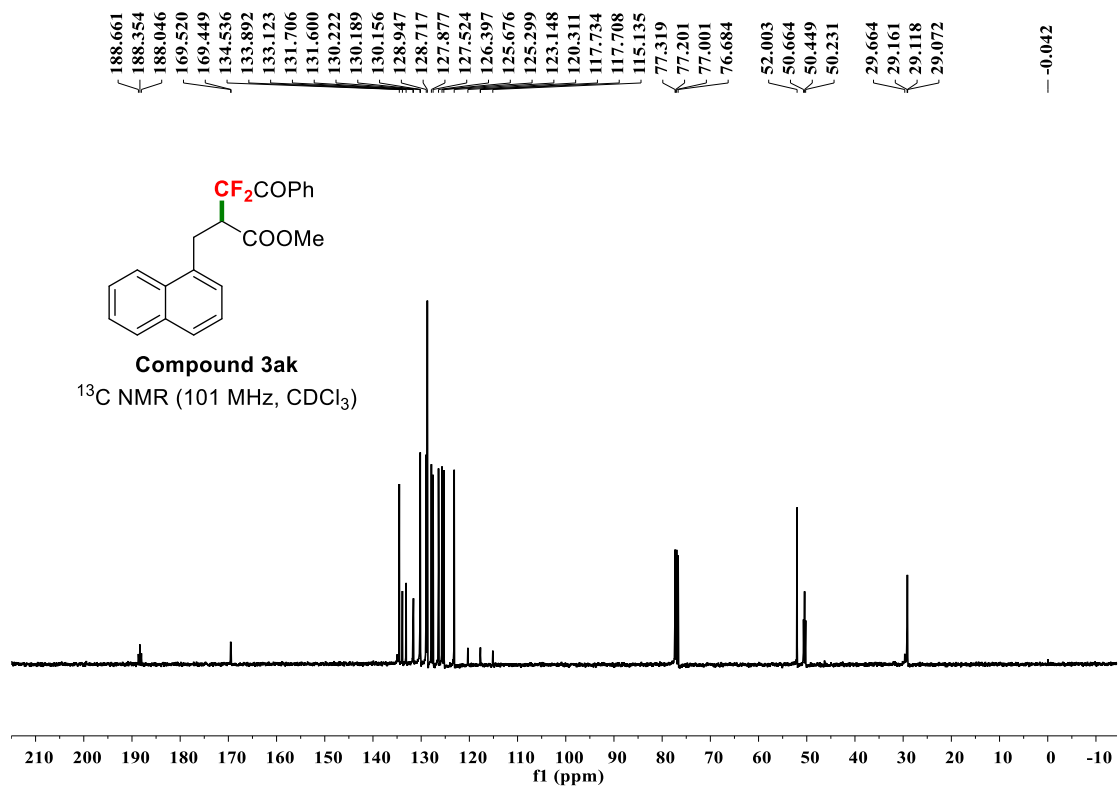

**Methyl-3,3-difluoro-4-oxo-2,4-diphenylbutanoate (3al).**

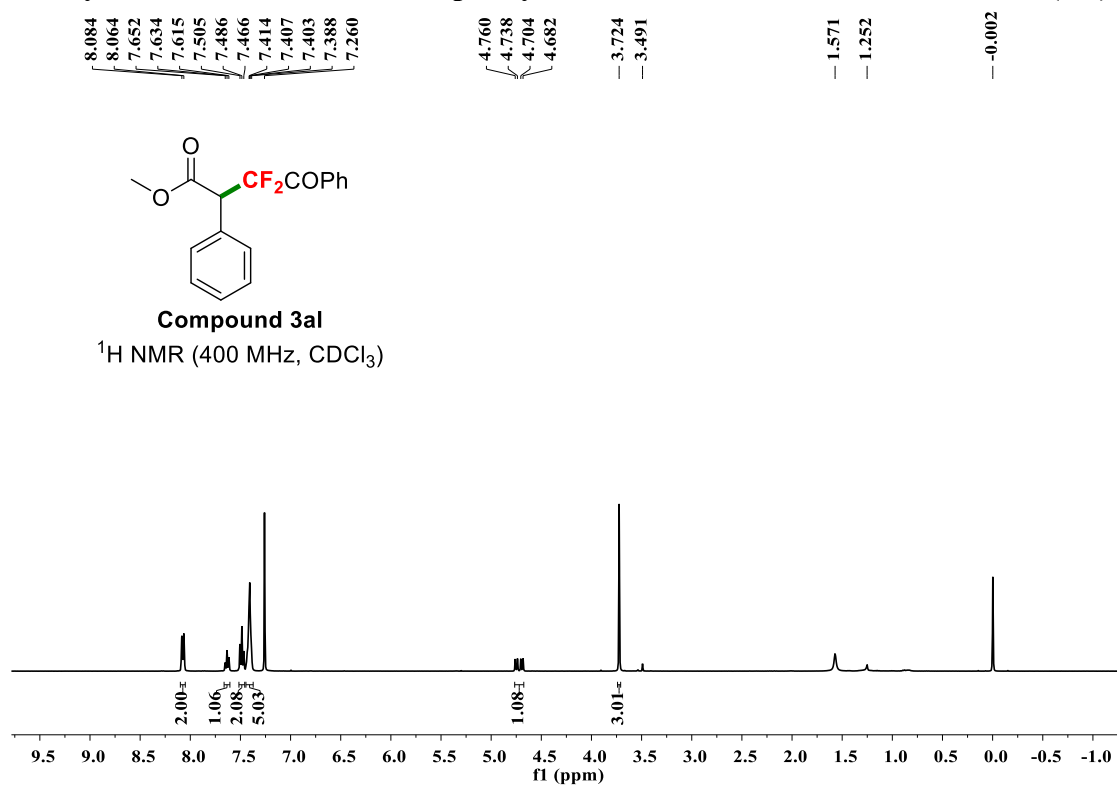

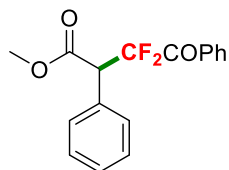

**Compound 3al**

$^{19}\text{F}$  NMR (376 MHz,  $\text{CDCl}_3$ )

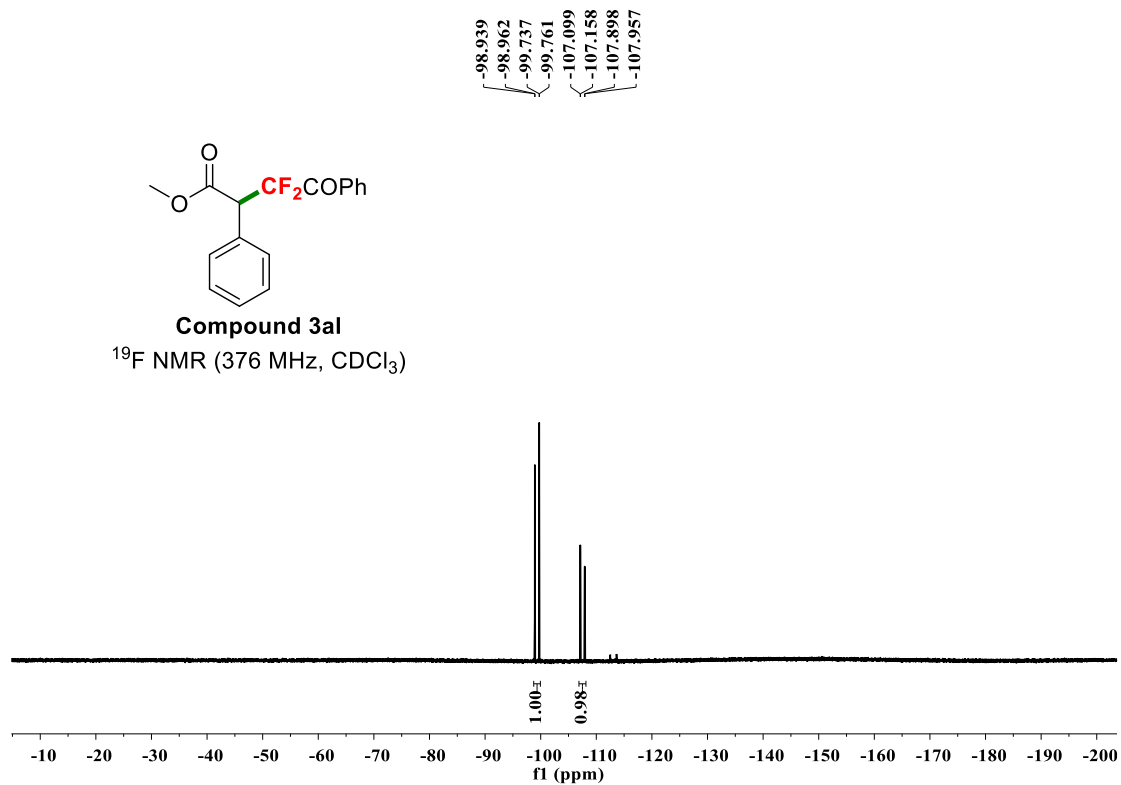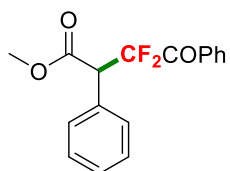

**Compound 3al**

$^{13}\text{C}$  NMR (101 MHz,  $\text{CDCl}_3$ )

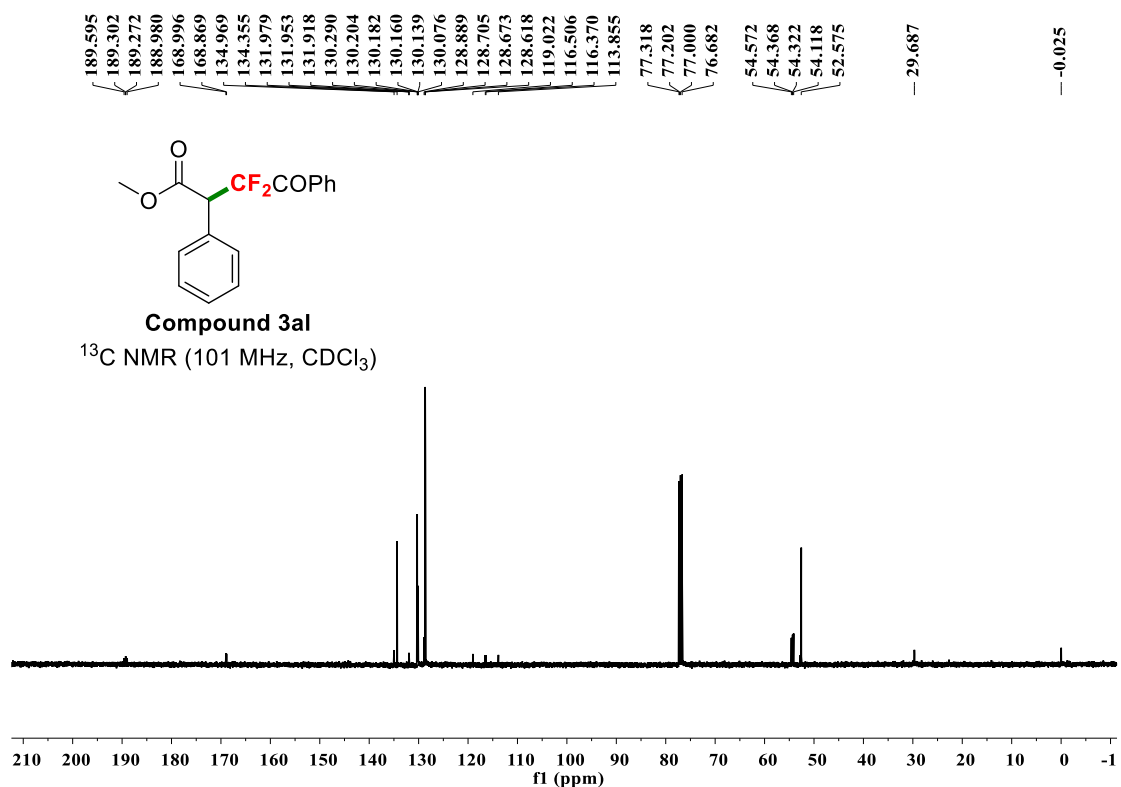

**Methyl 2-((1H-indol-3-yl)methyl)-3,3-difluoro-4-oxo-4-phenylbutanoate (3am).**

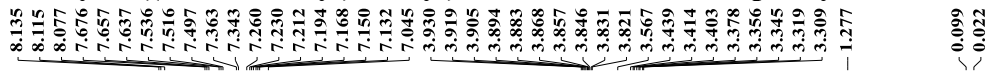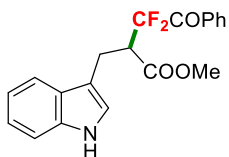

**Compound 3am**

<sup>1</sup>H NMR (400 MHz, CDCl<sub>3</sub>)

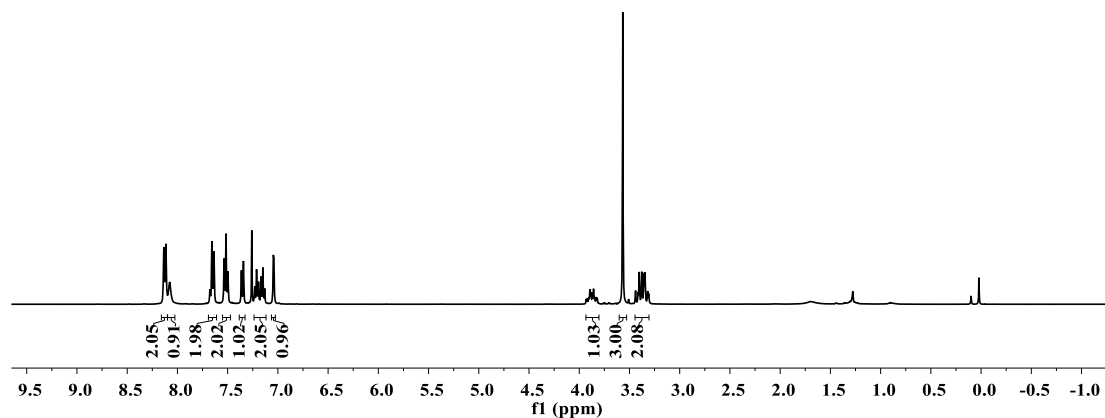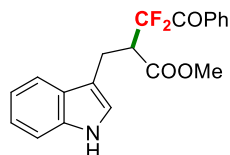

**Compound 3am**

<sup>19</sup>F NMR (376 MHz, CDCl<sub>3</sub>)

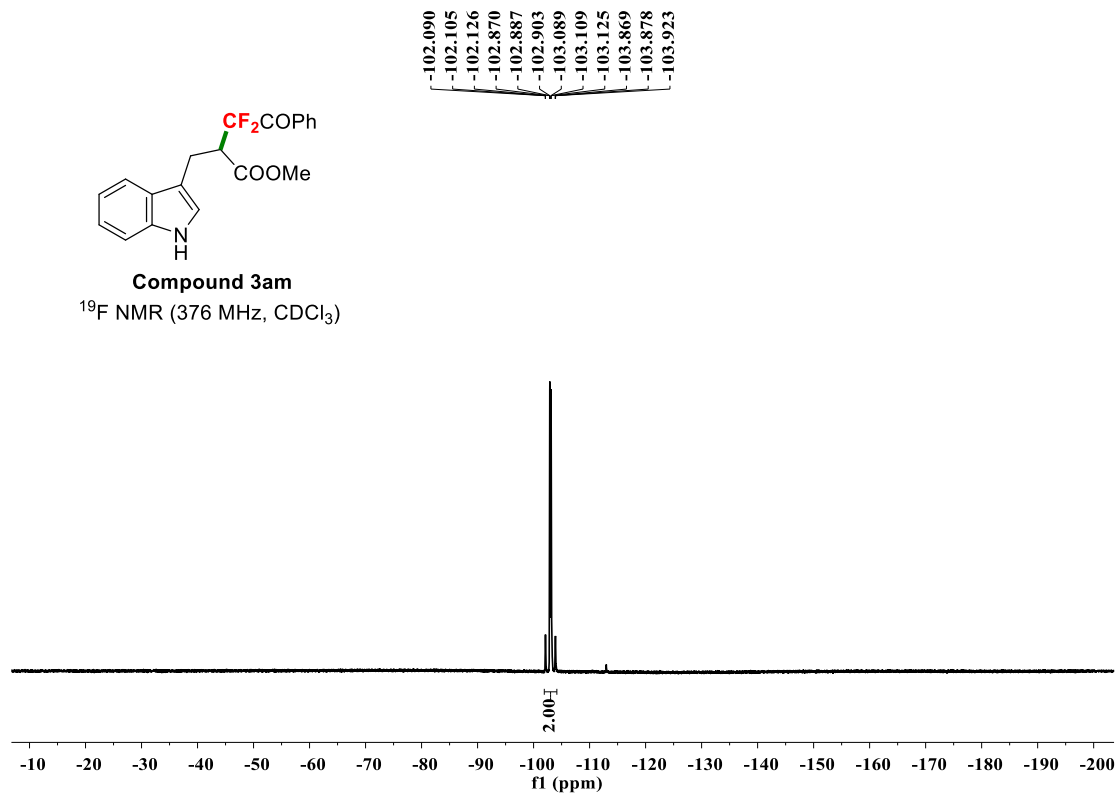

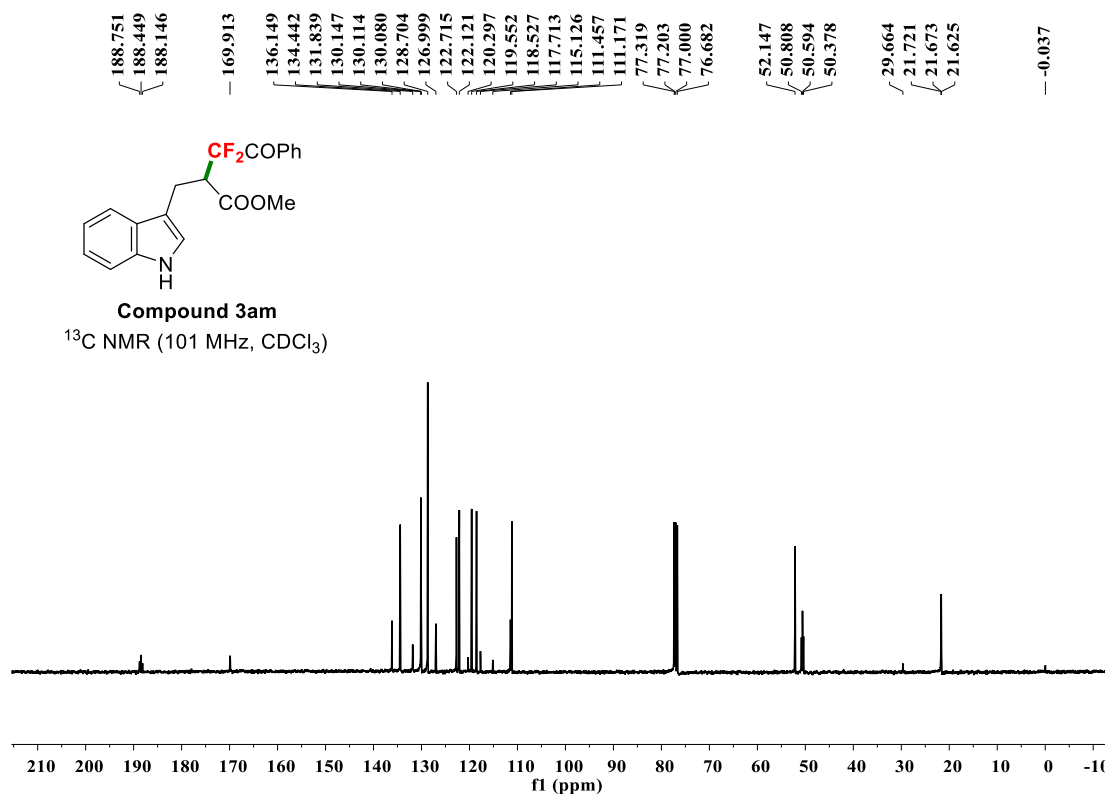

**Tert-butyl 2-(3-(1,1-difluoro-2-oxo-2-phenylethyl)-2-oxo-2,3,4,5-tetrahydro-1H-benzo[b]azepin-1-yl)acetate (3an).**

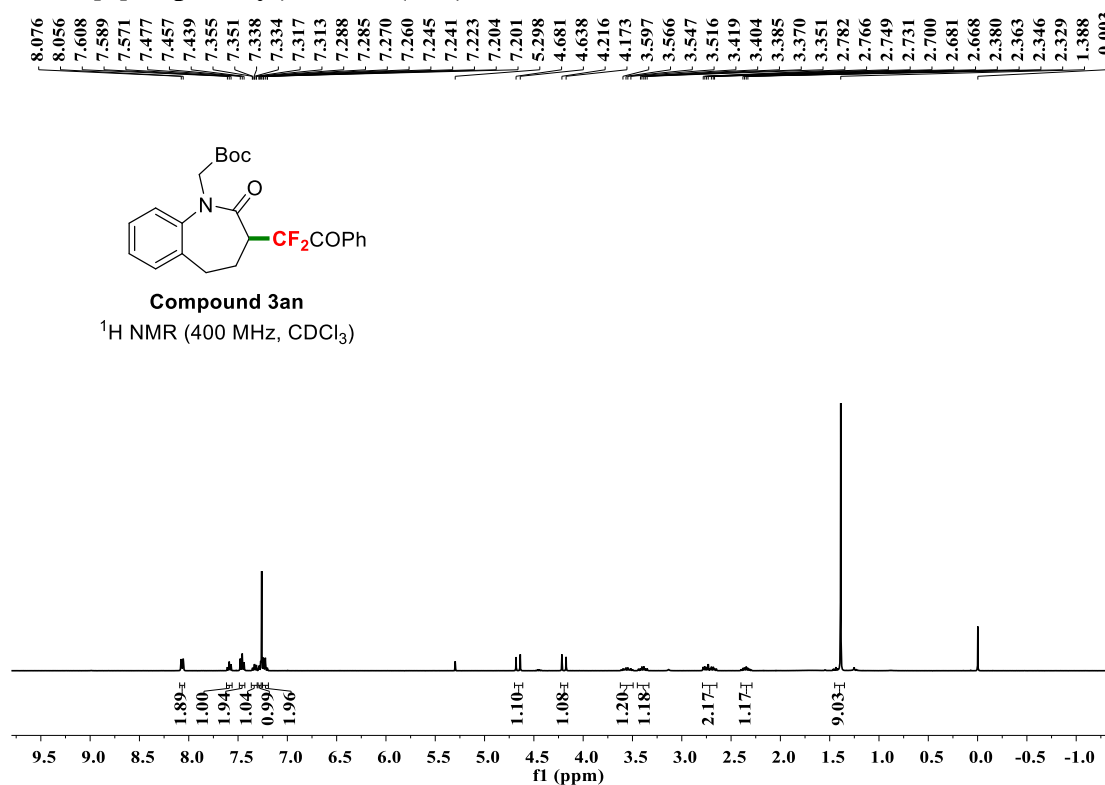

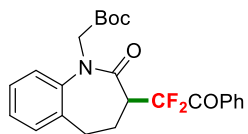

**Compound 3an**

<sup>19</sup>F NMR (376 MHz, CDCl<sub>3</sub>)

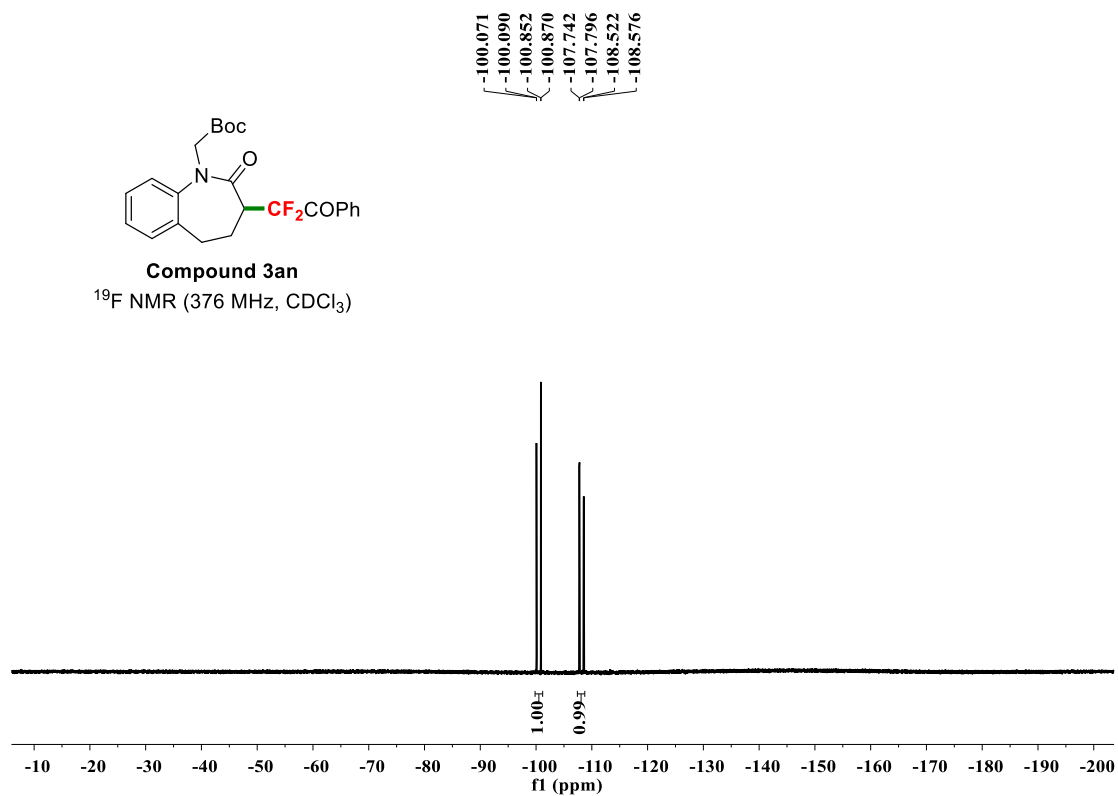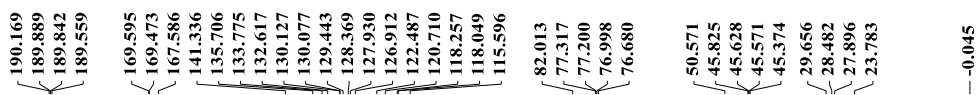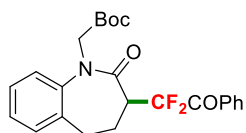

**Compound 3an**

<sup>13</sup>C NMR (101 MHz, CDCl<sub>3</sub>)

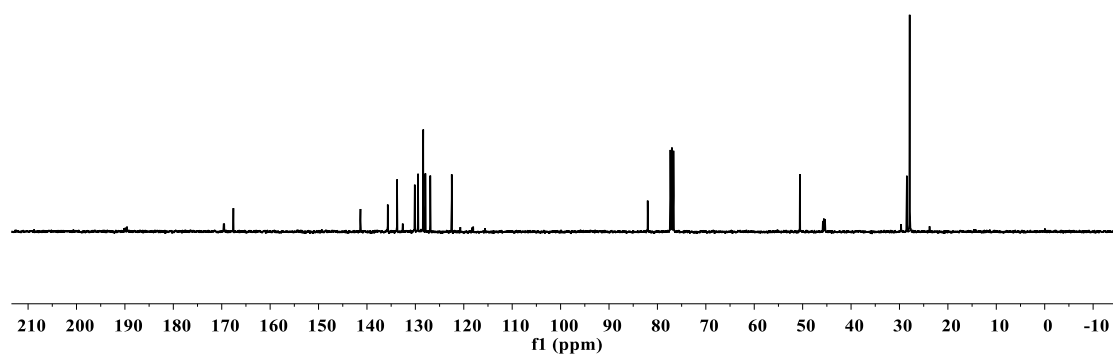



**Methyl (*E*)-6,6-difluoro-7-oxo-7-phenylhept-2-enoate (5).**

8.116  
8.097  
7.665  
7.646  
7.628  
7.525  
7.505  
7.485  
7.260  
7.021  
7.005  
6.988  
6.982  
6.966  
6.949  
5.923  
5.919  
5.915  
5.883  
5.880  
5.876  
3.734  
2.535  
2.518  
2.498  
2.481  
2.420  
2.410  
2.398  
2.379  
2.366  
2.356  
2.337  
2.323  
2.314  
2.296  
1.648  
— 1.250  
— -0.004

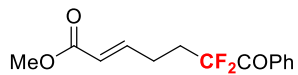

**Compound 5**

<sup>1</sup>H NMR (400 MHz, CDCl<sub>3</sub>)

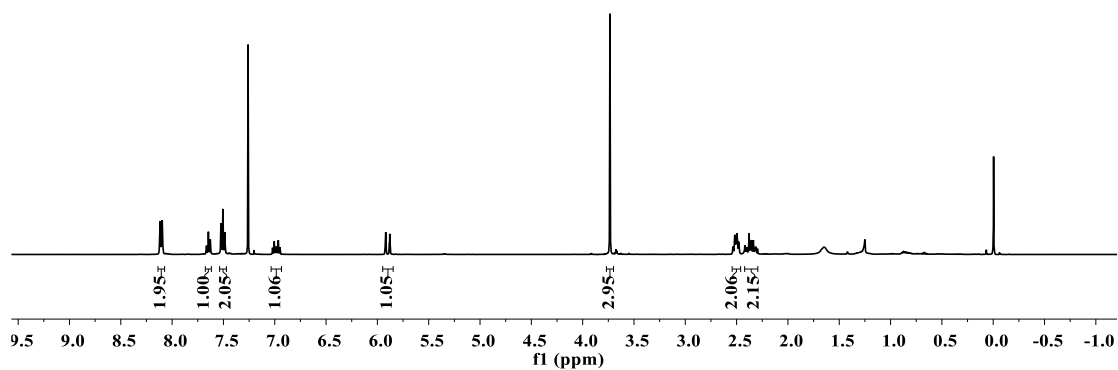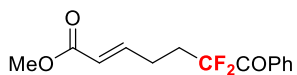

**Compound 5**

<sup>19</sup>F NMR (376 MHz, CDCl<sub>3</sub>)

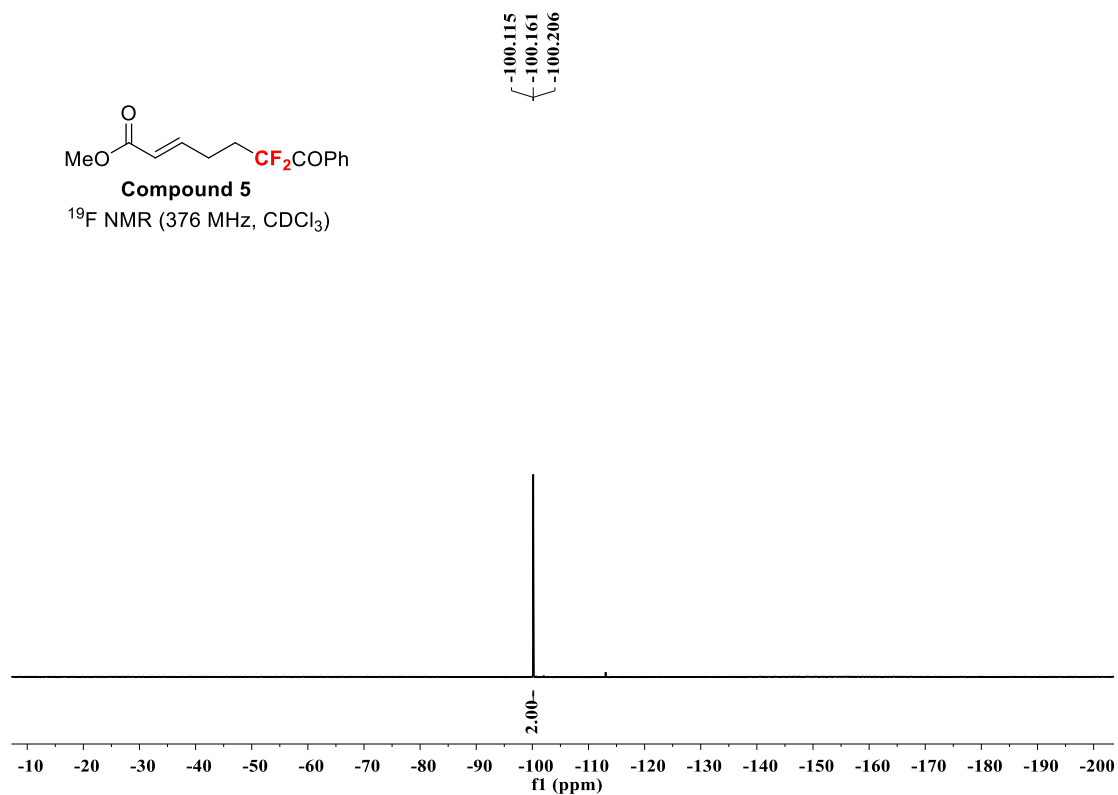

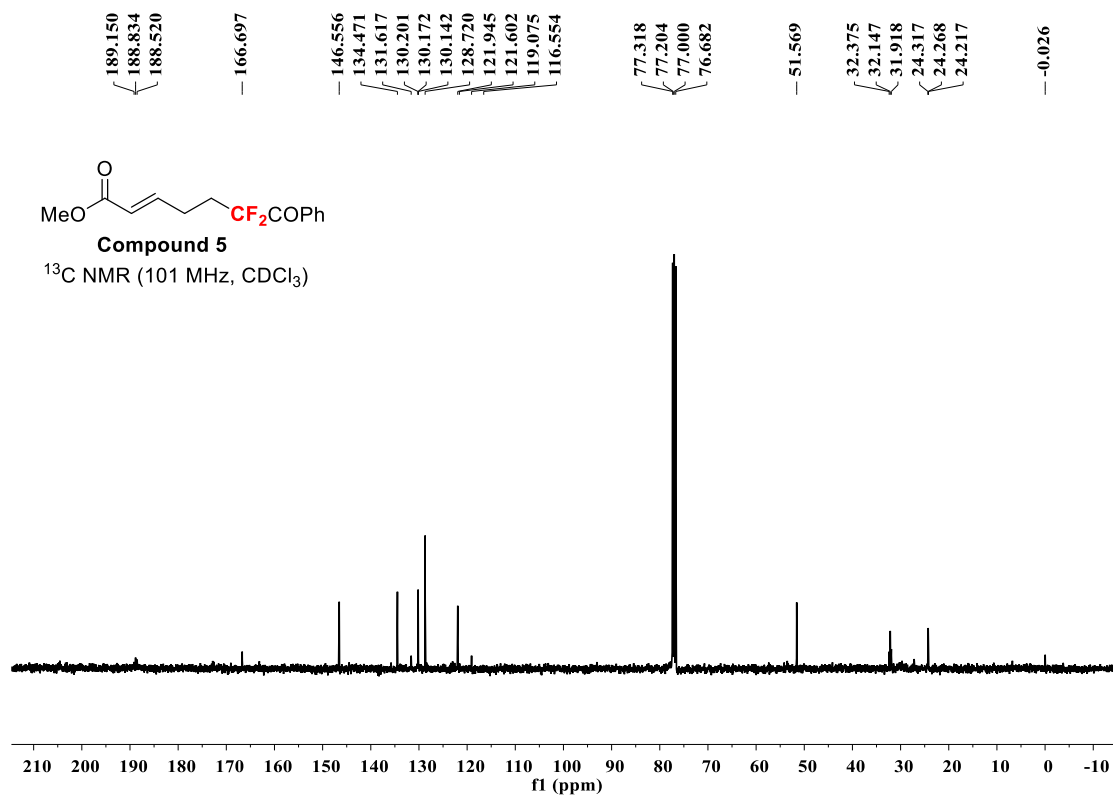

**Diethyl 2,6-dimethylpyridine-3,5-dicarboxylate (6).**

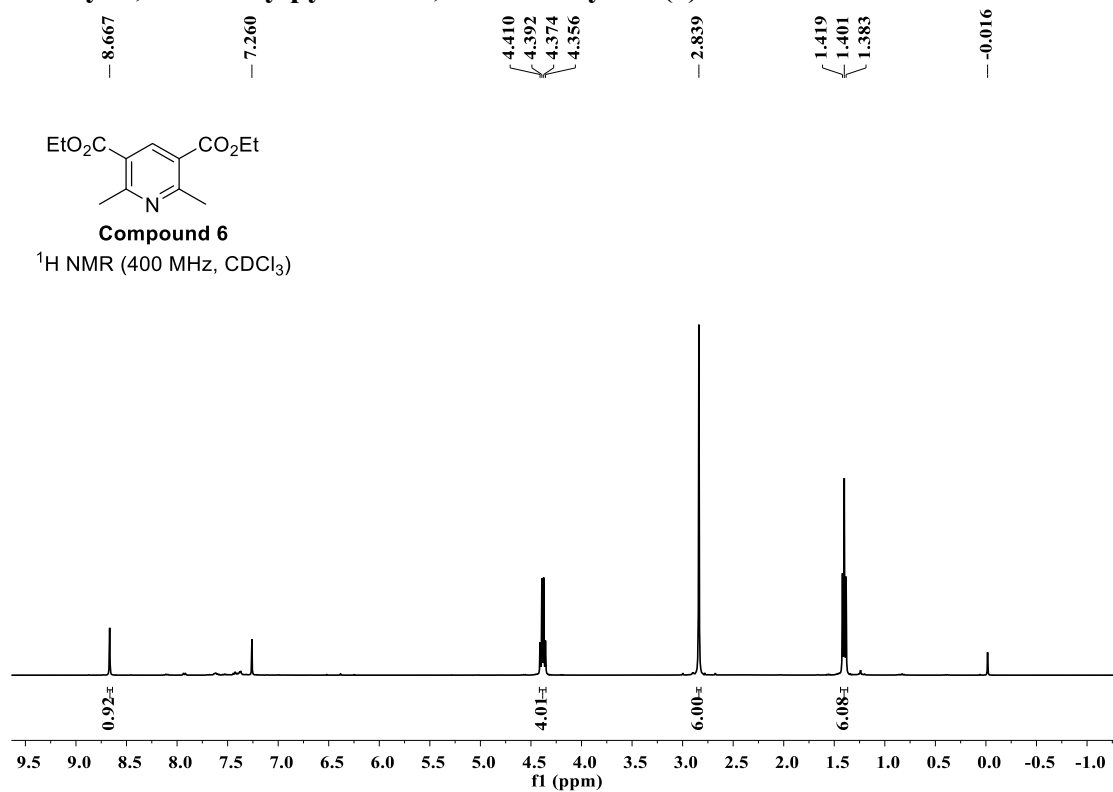

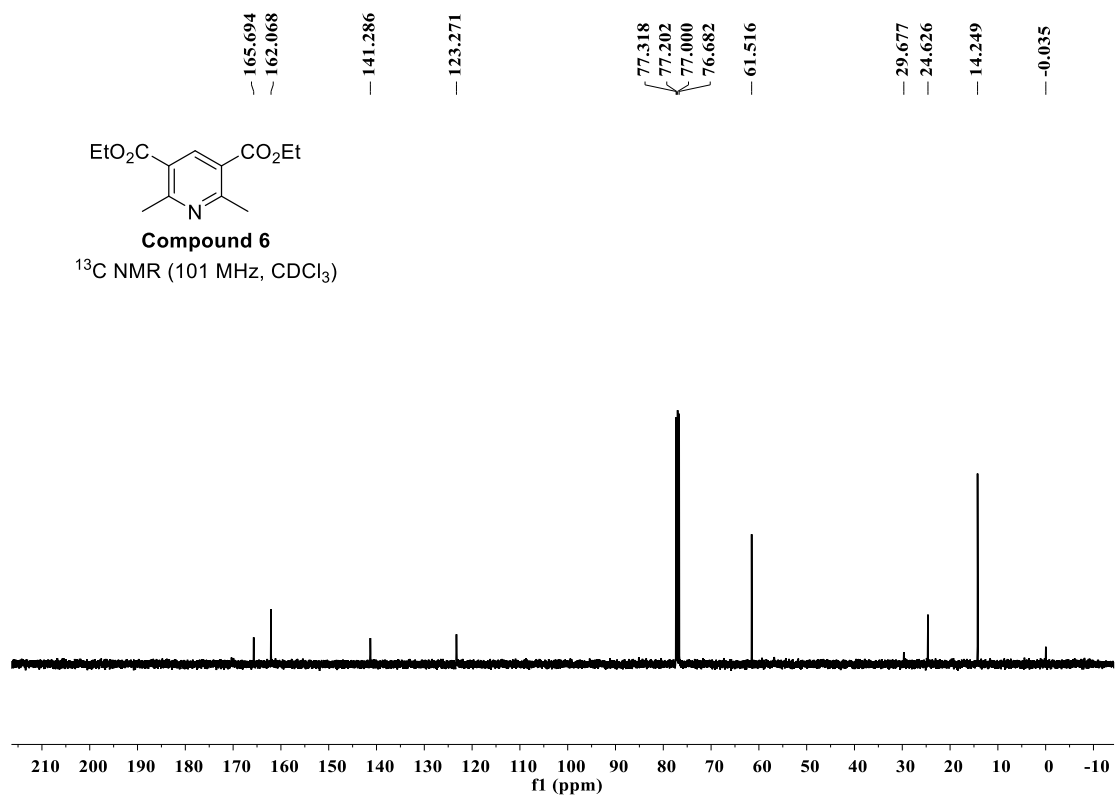

Supplement: d1qo00507c1.pdf [file d1qo00507c1.pdf]
